1                   **The coordinated localization of mRNA to centrosomes**  
2                                   **facilitates error-free mitosis**

3  
4

5                                   Pearl V. Ryder, Junnan Fang, and Dorothy A. Lerit<sup>1</sup>

6  
7

8   **Author affiliations:**

9   <sup>1</sup> Department of Cell Biology, Emory University School of Medicine, Atlanta, GA 30322

10

11   **Corresponding author:**

12   Dorothy A. Lerit, Ph.D.  
13   Department of Cell Biology  
14   Emory University School of Medicine  
15   615 Michael St.  
16   Whitehead Building, Room 444  
17   Atlanta, GA  
18   (404) 427-4707  
19   [dlarit@emory.edu](mailto:dlarit@emory.edu)

20  
21

22

23

24

25   **Running title:** Local mRNA affects centrosome function

26   **Keywords:** centrosome, RNA localization, cell division, embryo, development

27   **Funding:** This work was supported by NIH grants 5K12GM000680, 1F32GM128407 (PVR),  
28   and 5K22HL126922 (DAL) and an American Heart Association Postdoctoral Fellowship  
29   (20POST35210023) to JF.

30

## 31 **Abstract**

32 Centrosomes are microtubule-organizing centers required for error-free mitosis and embryonic  
33 development. The microtubule-nucleating activity of centrosomes is conferred by the  
34 pericentriolar material (PCM), a composite of numerous proteins subject to cell cycle-dependent  
35 oscillations in levels and organization. In diverse cell types, mRNAs localize to centrosomes and  
36 may contribute to changes in PCM abundance. Here, we investigate the regulation of mRNA  
37 localization to centrosomes in the rapidly cycling *Drosophila melanogaster* embryo. We find that  
38 RNA localization to centrosomes is regulated during the cell cycle and developmentally. We  
39 identify a novel role for the fragile-X mental retardation protein (FMRP), which localizes to  
40 pericentrosomal RNA granules, in the post-transcriptional regulation of centrosomal RNA.  
41 Further, the mis-targeting of a model centrosomal mRNA, *centrocortin* (*cen*), is sufficient to alter  
42 cognate protein localization to centrosomes and impair spindle morphogenesis and genome  
43 stability.

44

## 45 **Introduction**

46 The centrosome is a multi-functional organelle that serves as the primary microtubule-  
47 organizing center of most animal cells and comprises a central pair of centrioles surrounded by  
48 a proteinaceous matrix of pericentriolar material (PCM) (Conduit, Wainman, & Raff, 2015).  
49 During mitosis, centrosomes help organize the bipolar mitotic spindle and function to ensure the  
50 fidelity of cell division. In interphase, centrosomes contribute to cell polarization, intracellular  
51 trafficking, and ciliogenesis (Vertii, Hehnly, & Doxsey, 2016).

52 Cell cycle-dependent changes in PCM composition contribute to functional changes in  
53 centrosome activity. Upon mitotic entry, centrosomes undergo mitotic maturation, a process by  
54 which centrosomes augment their microtubule-nucleating capacity through the recruitment of  
55 additional PCM (Palazzo, Vogel, Schnackenberg, Hull, & Wu, 1999). This process is reversed  
56 upon mitotic exit by PCM shedding (Magescas, Zonka, & Feldman, 2019; Mittasch et al., 2020).

57 These dynamic oscillations in PCM composition and organization are essential for centrosome  
58 function, and their deregulation is associated with developmental disorders, increased genomic  
59 instability, and cancer (Conduit et al., 2015; Nigg & Raff, 2009). Nonetheless, the regulation of  
60 PCM dynamics remains incompletely understood.

61       Centrosomes are essential for early *Drosophila* embryogenesis, which proceeds through  
62 14 rounds of rapid, synchronous nuclear cycles (NCs) prior to cellularization (Foe & Alberts,  
63 1983). From NC 10–14, the embryo develops as a syncytial blastoderm, wherein thousands of  
64 nuclei and their associated centrosome pairs divide just under the embryonic cortex. Nuclear  
65 migration and divisions are coordinated by the centrosomes, and numerous mutations in  
66 centrosome-associated genes impair spindle morphogenesis, mitotic synchrony, genome  
67 stability, and embryonic viability (Deák et al., 1997; Freeman, Nüsslein-Volhard, & Glover, 1986;  
68 Sunkel & Glover, 1988). As in many organisms, the early development of the *Drosophila*  
69 embryo proceeds through a period of transcriptional quiescence and is supported by a maternal  
70 supply of mRNA and proteins (Vastenhouw, Cao, & Lipshitz, 2019). Thus, PCM dynamics  
71 apparent in early embryos rely upon post-transcriptional mechanisms.

72       Over a decade ago, a high-throughput screen for mRNAs with distinct subcellular  
73 locations in syncytial *Drosophila* embryos uncovered a subset of mRNAs localizing at or near  
74 spindle poles (Lécuyer et al., 2007). Many of the centrosome-enriched transcripts identified in  
75 that screen encode known centrosome regulators, including *cyclin B* (*cyc B*) and *pericentrin-like*  
76 *protein* (*plp*) (Dalby & Glover, 1992; Martinez-Campos, Basto, Baker, Kernan, & Raff, 2004;  
77 Raff, Whitfield, & Glover, 1990). These findings raise the possibility that RNA localization,  
78 translational control, and other post-transcriptional regulatory mechanisms contribute to  
79 centrosome activity and/or function. Consistent with this idea, RNA is known to associate with  
80 centrosomes in diverse cell types, including early embryos (*Drosophila*, *Xenopus*, zebrafish, and  
81 mollusk), surf clams, and cultured mammalian cells (Alliegro & Alliegro, 2008; Alliegro, Alliegro,  
82 & Palazzo, 2006; Blower, Feric, & Heald, 2007; Lambert & Nagy, 2002; Lécuyer et al., 2007;

83 Raff et al., 1990; Sepulveda et al., 2018). The functional consequences and the mechanisms  
84 that regulate centrosome-localized RNA remain little understood, however (Marshall &  
85 Rosenbaum, 2000; Ryder & Lerit, 2018).

86 Here, we report that multiple RNA transcripts dynamically localize to centrosomes in  
87 *Drosophila* early embryos. We show these RNAs localize in unique patterns, with some RNAs  
88 forming higher-order granules, while others enrich around centrosomes as individual molecules.  
89 We further demonstrate that some RNAs enrich at centrosomal subdomains, such as the  
90 centrosome flares, which extend from interphase centrosomes and define the PCM scaffold  
91 (Lerit et al., 2015; Megraw, Kilaru, Turner, & Kaufman, 2002; Richens et al., 2015). We identify  
92 one centrosomal RNA, *centrocortin* (*cen*), which forms micron-scale granules that localize  
93 asymmetrically to centrosomes. We further define the mechanisms underlying *cen* granule  
94 formation and function. We find that *cen* granules include Cen protein and the translational  
95 regulator fragile-X mental retardation protein (FMRP), the ortholog of the Fragile X Syndrome-  
96 related RNA-binding protein encoded by the *fmr1* gene. Our data show FMRP regulates both  
97 the localization and steady-state levels of *cen* RNA and protein. Moreover, we find that reducing  
98 *cen* dosage is sufficient to rescue the mitotic spindle defects associated with *fmr1* loss. Finally,  
99 we show that mislocalization of *cen* RNA prevents the localization of Cen protein to distal  
100 centrosomes and is associated with disrupted embryonic nuclear divisions.

101

## 102 **Results**

### 103 ***Quantitative analysis of mRNA distributions relative to Drosophila early embryonic*** 104 ***centrosomes***

105 A previous genome-wide screen identified a cohort of mRNAs showing apparent localization  
106 near spindle poles (Lécuyer et al., 2007). To quantitatively assess transcript localization to  
107 centrosomes, we combined single molecule fluorescence *in situ* hybridization (smFISH) with  
108 direct visualization of centrosomes. smFISH permits precise subcellular localization of individual

109 RNA molecules, an important feature when determining enrichment at a relatively small target,  
110 such as the centrosome (Raj, van den Bogaard, Rifkin, van Oudenaarden, & Tyagi, 2008). For  
111 this analysis, we focused on syncytial embryos in NC 13, as their relatively prolonged  
112 interphase facilitates the collection of sufficient samples for quantification (Foe & Alberts, 1983).  
113 We used GFP-Centrosomin (GFP-Cnn) expressed under endogenous regulatory elements to  
114 label centrosomes (Lerit et al., 2015). Cnn is a core component of the centrosome scaffold  
115 required for the organization of the PCM that defines the outer edge of the centrosome (Conduit  
116 et al., 2010; Conduit et al., 2014; Megraw, Li, Kao, & Kaufman, 1999). Among the candidate  
117 RNAs reported to localize near spindle poles, we selected five for investigation based on prior  
118 data implicating their protein products in centrosome regulation and/or cell division: *cyc B*, *p/p*,  
119 *small ovary (sov)*, *partner of inscuteable (pins)*, and *cen* (Lécuyer et al., 2007; Fig. 1  
120 Supplemental Table 1).

121 To examine patterns of RNA localization, we developed an automated custom image  
122 analysis pipeline that calculates the distribution of RNA transcripts relative to the distance from  
123 the centrosome (Fig. 1 Supplement 1A; see Methods). Briefly, smFISH signals and  
124 centrosomes were segmented, and the distances between individual RNA objects and the  
125 closest centrosome were measured (Fig. 1 Supplement 1B, C). This analysis allowed us to  
126 calculate the cumulative distribution of mRNA molecules relative to their distance from the  
127 surface of a centrosome (Fig. 1 Supplement 1D). We define mRNAs residing within 1  $\mu\text{m}$  from  
128 the centrosome surface as pericentrosomal, or centrosome-enriched, because centrosomes  
129 extend dynamic Cnn-rich flares that rapidly sample this volume (Lerit et al., 2015; Megraw et al.,  
130 2002; Mennella et al., 2012). Among these localized mRNAs, those residing at 0  $\mu\text{m}$  overlap  
131 with the centrosome (arrowheads, Fig. 1 Supplement 1C, D).

132 Several prior studies noted an enrichment of *cyc B* mRNA in the spindle pole region of  
133 syncytial *Drosophila* embryos (Dalby & Glover, 1992; Raff et al., 1990; Vardy & Orr-Weaver,

134 2007). Therefore, we initially investigated the localization of *cyc B* relative to a non-localizing  
135 control RNA, *gapdh*, to validate our quantitative imaging approach. Consistent with prior reports,  
136 we observed that *cyc B* was particularly abundant at the posterior pole (Raff et al., 1990).  
137 However, for the purposes of this study, all measurements were made in the somatic region at  
138 approximately 50% egg-length unless otherwise noted. To monitor cell cycle-dependent  
139 changes in RNA distribution, centrosome enrichments were calculated during interphase and  
140 metaphase. As expected, we found that *gapdh* was dispersed as single molecules throughout  
141 the cytoplasm (Fig. 1A, B), and few *gapdh* transcripts resided near centrosomes despite high  
142 levels of expression (Fig. 1C)(Graveley et al., 2011). By contrast, more *cyc B* transcripts  
143 localized in proximity to centrosomes, particularly during interphase (Fig. 1D, E). Approximately  
144 2-fold more *cyc B* was enriched near centrosomes relative to *gapdh* (Fig. 1F and Fig 1.  
145 Supplement 2A, B).

146 In interphase embryos, some *cyc B* smFISH signals appeared brighter and larger,  
147 suggesting that multiple *cyc B* transcripts clustered into higher order structures, hereafter  
148 referred to as RNA granules, near centrosomes (arrowhead, Fig. 1D). Quantification of the  
149 proportion of total RNA residing within granules, defined as an overlapping cluster of four or  
150 more mRNAs (Little, Sinsimer, Lee, Wieschaus, & Gavis, 2015), confirmed that more *cyc B*  
151 RNAs resided within pericentrosomal granules than *gapdh* (Fig. 1 Supplement 3A; Fig. 1  
152 Supplemental Table 2). These findings demonstrate the utility of our analysis pipeline to  
153 quantitatively define RNA enrichments at centrosomes. Moreover, our data suggest that *cyc B*  
154 localization to centrosomes is regulated by granule formation and cell cycle progression.

155

### 156 ***Multiple mRNAs are enriched at centrosomes in a cell-cycle dependent manner***

157 We next investigated the localization of *p/p* mRNA, as PLP protein cooperates with Cnn to  
158 mediate centrosome scaffolding (Lerit et al., 2015; Richens et al., 2015). Recently, orthologous  
159 *PCNT* transcripts were shown to be localized to centrosomes in zebrafish embryos and cultured

160 mammalian cells, specifically during early mitosis (Sepulveda et al., 2018). In contrast, we found  
161 that *p/p* transcripts frequently overlap with centrosomes during interphase (Fig. 1G–I; Fig 1.  
162 Supplement 2C). Specifically, *p/p* was 1.6-fold enriched within 1  $\mu$ m of centrosomes in  
163 interphase embryos relative to *gapdh*, yet only 1.3-fold enriched in metaphase embryos (Fig.  
164 1I). We also noted that a subset of *p/p* RNA (21.6% of total *p/p* transcripts) localized to  
165 pericentrosomal granules in interphase (Fig. 1 Supplement 3B). By contrast, only 6.0% of *p/p*  
166 transcripts in metaphase embryos were contained in pericentrosomal granules (Fig. 1  
167 Supplement 3B; Fig. 1 Supplemental Table 2). These data reveal that *p/p* mRNA enriches within  
168 granules at centrosomes specifically in interphase, coincident with the formation of centrosome  
169 flares containing PLP protein (Lerit et al., 2015), hinting that aspects of *p/p* post-transcriptional  
170 regulation may be differentially regulated over the cell cycle.

171 We similarly analyzed the localization of *p/ins* and *sov* mRNAs relative to centrosomes.  
172 *p/ins* localized throughout the cytoplasm with only modest enrichments near centrosomes (Fig. 1  
173 Supplement 2D and Fig. 1 Supplement 4A–C). Likewise, little *p/ins* is organized into RNA  
174 granules (Fig. 1 Supplement 3C; Fig. 1 Supplemental Table 2). In contrast, we found *sov* mRNA  
175 enriched at centrosomes (Fig. 1 Supplement 2E and Fig. 1 Supplement Fig. 4D–E), as  
176 previously noted (Lécuyer et al., 2007). smFISH highlights the propensity for *sov* mRNA to  
177 localize along centrosomal flares in interphase embryos (arrowheads, inset, Fig. 1 Supplement  
178 4D). Consistent with these observations, over 20% of *sov* transcripts overlapped with interphase  
179 centrosomes (0  $\mu$ m, Fig. 1 Supplement 4F), and ~40% resided within 1  $\mu$ m (1.9-fold enriched  
180 relative to *gapdh*; Fig. 1 Supplemental Table 2). Although centrosome-enrichment of *sov* is  
181 halved during mitosis (~20% within 1  $\mu$ m, Fig. 1 Supplement 4F), it was still 1.8-fold more  
182 enriched than *gapdh* (Fig. 1 Supplemental Table 2). Similarly, the proportion of *sov* within  
183 granules decreases upon mitotic onset (Fig. 1 Supplement 3D).

184 In sum, these findings reveal common and unique features of centrosome-localized

185 mRNAs within *Drosophila* embryos. Generally speaking, localized mRNAs tend to be more  
186 enriched at centrosomes during interphase as compared to metaphase, although the magnitude  
187 of these changes varies by RNA. We also note increased biological variability in the proximity of  
188 mRNA to interphase centrosomes (e.g., compare error bars for interphase vs. mitosis, Fig 1F  
189 and I; Fig 1 Supplement Fig 2). These trends likely reflect the dynamic properties of the  
190 interphase centrosome, which extends protrusive flares to facilitate its expansion after mitotic  
191 exit (Lerit et al., 2015; Megraw et al., 2002). These data also suggest that RNA localization to  
192 centrosomes may be dynamic as well. RNA residence within granules is also more prevalent  
193 during interphase, similarly suggesting that aspects of RNA granule formation are cell cycle  
194 regulated.

195

#### 196 ***Dynamic regulation of micron-scale cen RNA granules***

197 We next investigated the localization of *cen*, which was previously shown to be required for  
198 normal nuclear divisions in the *Drosophila* early embryo (Kao & Megraw, 2009). Unlike the other  
199 RNAs we investigated, the majority of *cen* was enriched at centrosomes (arrow, Fig. 2A).  
200 Throughout NC 13, we found that *cen* formed micron-scale granules, consistent with a recent  
201 report (Fig. 2A, B)(Bergalet et al., 2020). Demonstrating specificity, these signals were not  
202 detected in *cen* null mutant samples (Fig. 2 Supplement 1A). During interphase, these granules  
203 overlapped asymmetrically with a single centrosome (arrow, Fig. 2A). Further analysis revealed  
204 *cen* granules preferentially associate with mother centrosomes (Fig. 2 Supplement 1B, C). In  
205 metaphase, however, *cen* granules appeared less tightly associated with centrosomes (Fig. 2B).  
206 Quantification revealed that more than 50% of *cen* transcripts in NC 13 interphase embryos  
207 overlapped with centrosomes (resided at 0  $\mu\text{m}$ ), and over 80% of *cen* localized within 1  $\mu\text{m}$  of a  
208 centrosome (Fig. 2C and Fig. 2 Supplement 2A). In metaphase, this enrichment is reduced (Fig.  
209 2C). However, in both interphase and metaphase embryos, *cen* was approximately 4-fold more  
210 enriched at centrosomes relative to *gapdh* (Fig. 1 Supplemental Table 2). We further noted that



211 fewer *cen* transcripts were detected in granules within 1  $\mu\text{m}$  of a centrosome, dropping to 48%  
212 in metaphase from 75% in interphase (Fig. 2D; Fig. 2 Supplement 2B; and Fig. 1 Supplemental  
213 Table 2). These data demonstrate that *cen* forms micron-scale granules that localize to  
214 centrosomes in a cell cycle-dependent manner. These granules frequently overlap with  
215 centrosomes, resulting in a bulk enrichment of *cen* mRNA at centrosomes.

216         The strong enrichment of *cen* within pericentrosomal granules prompted us to  
217 investigate the developmental timing of their formation. In NC 10 embryos, the timepoint at  
218 which the syncytial nuclei first reach the cortex, we found that *cen* predominantly existed in  
219 single molecules radiating in a gradient from centrosomes (Fig. 2E). Entry into mitosis  
220 correlated with formation of larger *cen* granules that were closely apposed and symmetrically  
221 distributed to the two centrosomes (Fig. 2F). Similarly, the percentage of *cen* transcripts  
222 localized within 1  $\mu\text{m}$  of a centrosome increased from ~15% in interphase to nearly 20% in  
223 metaphase embryos (Fig. 2G; Fig. 2 Supplement 2C). Concordantly, the amount of *cen* RNA  
224 within pericentrosomal granules also increased, from 12% in interphase to 18% in metaphase (1  
225  $\mu\text{m}$ , Fig. 2H; Fig. 2 Supplement 2D; and Fig. 1 Supplemental Table 2). These data indicate that  
226 the formation of *cen* granules is entrained with the cell cycle and correlates with the initiation of  
227 cortical nuclear divisions. Our finding that *cen* RNA persists in a granular structure during  
228 interphase of NC 13 suggests the capacity for *cen* granule formation or maintenance is  
229 additionally regulated developmentally. Fewer granules are observed in younger embryos,  
230 which may be a feature of the abridged nature of those nuclear division cycles.

231

### 232 ***The cen granule contains Cen protein, yet is dispensable for translation***

233 To gain insight into the regulation and function of *cen* granules, we first investigated granule  
234 content. Recent work uncovered that *cen* granules contain Cen protein, and some *cen* granules  
235 represent sites of local translation (Bergalet et al., 2020). We similarly noted a strong

236 coincidence of *cen* RNA and protein, confirming that Cen protein is abundant in *cen* granules  
237 (Fig. 3A, B).

238 Previous work demonstrated Cen interacts directly with the centrosome scaffold protein,  
239 Cnn. In addition, a point mutation in Cnn, the *cnn<sup>B4</sup>* allele, was sufficient to disrupt binding  
240 between Cnn and Cen and, consequently, Cen protein localization to centrosomes (Kao &  
241 Megraw, 2009). To test whether the centrosome scaffold is required for the localization of *cen*  
242 RNA to centrosomes, we examined if *cen* RNA localized to granules in *cnn<sup>B4</sup>* mutants. We found  
243 that *cen* no longer formed granules in *cnn<sup>B4</sup>* embryos and instead appeared dispersed  
244 throughout the cytoplasm as single molecules (Fig. 3 Supplement 1A). This behavior  
245 subsequently allowed us to test if *cen* granules were required for Cen translation. We observed  
246 no difference in the levels of Cen protein in 0-2 hour wild-type (WT) control versus *cnn<sup>B4</sup>* mutant  
247 embryos, suggesting that the *cen* granule is not required for *cen* translation (Fig. 3 Supplement  
248 1B, B'). These data support a model where the centrosome scaffold contributes to the formation  
249 of the *cen* granule, likely via associations between Cen and Cnn.

250

### 251 ***FMRP associates with cen granules***

252 RNA granules are diverse structures, and RNA-binding proteins are crucial for their formation  
253 and function (Singh, Pratt, Yeo, & Moore, 2015). Therefore, to provide mechanistic insight into  
254 the regulation of the *cen* granule, we assayed the centrosomal localization of a few candidate  
255 RNA-binding proteins, including Maternal expression at 31B (Me31B), Pumilio (Pum),  
256 Egalitarian (Egl), Orb2, and FMRP (Deshpande, Calhoun, & Schedl, 2006; Dienstbier, Boehl, Li,  
257 & Bullock, 2009; Gamberi, Johnstone, & Lasko, 2006); Fig. 3 Supplement 2A–E). Among these,  
258 a subset of FMRP puncta overlapped with centrosomes and *cen* granules (Fig. 3 Supplement  
259 2E (arrowheads) and F (dashed circle)).

260 To further investigate the relationship between Cen and FMRP, we used a proximity  
261 ligation assay (PLA), which detects protein interactions when two primary antibodies bind

262 antigens within a 40 nm threshold (Söderberg et al., 2006). In control experiments without Cen  
263 and FMRP antibodies, we rarely detected PLA signals in NC 14 embryos (Fig. 3C, D, and F).  
264 However, we detected a significant increase in PLA signals with Cen and FMRP antibodies  
265 ( $P < 0.0001$ ; Fig. 3E, F), indicating that subsets of these proteins reside in close physical  
266 proximity.

267 Finally, we biochemically probed *cen*-interacting factors. We isolated endogenous Cen  
268 protein complexes from early embryos by immunoprecipitation and found FMRP specifically  
269 associates with Cen (Fig. 3G). We similarly co-isolated *cen* RNA from Cen immunoprecipitates  
270 (Fig. 3H). Moreover, FMRP pulls down *cen* mRNA (Fig 3I, J). Taken together, we conclude that  
271 the *cen* granule represents a ribonucleoprotein (RNP) complex comprising several protein  
272 constituents, including Cen and FMRP. These data also hint that FMRP may mediate aspects of  
273 *cen* regulation.

274

### 275 ***FMRP functions as a negative regulator of cen RNA granule formation and localization to*** 276 ***centrosomes***

277 FMRP is a multifunctional RNA-binding protein implicated in RNA localization, stability, and  
278 translational regulation (Banerjee, Ifrim, Valdez, Raj, & Bassell, 2018). To determine if FMRP  
279 contributes to *cen* regulation, we first compared the pericentrosomal localization of *cen* RNA  
280 and protein in control versus *fmr1* null mutant embryos expressing the PCM marker  $\gamma$ -Tubulin-  
281 GFP ( $\gamma$ -Tub-GFP). In control NC 10 interphase embryos, *cen* RNA was dispersed in  
282 predominantly single molecules near centrosomes, as we previously noted (Fig. 4 Supplement  
283 1A). In *fmr1* embryos, however, *cen* RNA localized to granules of heterogenous size that  
284 clustered near centrosomes (Fig. 4 Supplement 1B), resulting in enhanced enrichment of *cen*  
285 near centrosomes (Fig. 4 Supplement 1E). In NC 10 metaphase embryos, *cen* formed small  
286 granules near centrosomes in control embryos (Fig. 4 Supplement 1C), but appeared to form

287 larger granules in *fmr1* mutants (Fig. 4 Supplement 1D). Quantification revealed that 1.6-fold  
288 more *cen* was contained in granules localized within 1  $\mu$ m of a centrosome in *fmr1* interphase  
289 embryos relative to controls (Fig. 4 Supplement 1F). In contrast, relatively similar levels of *cen*  
290 were contained in granules in *fmr1* embryos relative to controls during metaphase (Fig. 4  
291 Supplement 1F; Fig. 4 Supplement 2A, B; Fig. 4 Supplemental Table 1). These data  
292 demonstrate that *cen* forms granules precociously in *fmr1* embryos, suggesting that FMRP  
293 normally limits *cen* localization to centrosomes.

294 We next investigated the contribution of FMRP to *cen* localization at later stages of  
295 development. In control NC 13 interphase embryos, *cen* formed micron-scale granules of  
296 heterogenous size (Fig. 4A). These pericentrosomal granules were larger in *fmr1* embryos (Fig.  
297 4B), with 46% of *cen* transcripts overlapping with the centrosome in controls, compared to 68%  
298 in *fmr1* mutants (a 1.5-fold increase over WT; Fig. 4E; Fig. 4. Supplement 2C; Fig. 4  
299 Supplemental Table 1). *fmr1* mutants also had more *cen* contained in granules during  
300 interphase, suggesting *cen* granule formation and/or localization was deregulated (Fig. 4F, Fig.  
301 4 Supplement 2D). During metaphase, distributions of *cen* mRNA within *fmr1* mutants were  
302 more similar to WT, hinting that FMRP may contribute to the cell cycle dependent regulation of  
303 *cen* localization (Fig. 4C–F; Fig. 4. Supplement 2C and D; and Fig. 4 Supplemental Table 1).

304 These data show that loss of FMRP is associated with larger *cen* granules, which reside  
305 closer to and are more likely to overlap with centrosomes during interphase. We conclude that  
306 FMRP negatively regulates *cen* localization to centrosomes.

307

### 308 ***FMRP regulates the abundance of cen RNA and protein***

309 Since the early embryo is transcriptionally inactive for the first two hours of development  
310 (Anderson & Lengyel, 1979), the enhanced formation of *cen* granules in *fmr1* mutants could be  
311 attributed to changes in RNA localization, increased RNA stability, or both.

312 To test if FMRP contributes to *cen* RNA stability, we examined normalized *cen* RNA

313 levels by qPCR. We found no significant change in *cen* RNA levels in *fmr1* vs. WT 0-1 hr  
314 embryos (P=0.07 by unpaired t-test; Fig. 5A). FMRP functions primarily as a translational  
315 repressor, and deregulation of FMRP targets in neurons is considered a significant driver of  
316 Fragile X Syndrome pathophysiology (Banerjee et al., 2018; Damell, 2011). In 0–1 hr embryos,  
317 total levels of Cen protein were also unaffected by loss of *fmr1* (P=0.9 by unpaired t-test; Fig.  
318 5B and B'). In contrast, within 1–3 hr embryos, *cen* RNA levels increased by 1.8–fold in *fmr1*  
319 mutants relative to controls (P<0.0001 by unpaired t-test; Fig. 5C). Similarly, 1–3 hr *fmr1*  
320 embryo extracts contained significantly more Cen protein than controls (3.7–fold increase in  
321 mutants relative to WT, P=0.03 by unpaired t-test; Fig. 5D and D'). Thus, while we found that  
322 both *cen* RNA and protein levels are increased in later stage *fmr1* embryos, the relative  
323 increase in Cen protein is nearly twice that observed for *cen* RNA. Taken together, these data  
324 suggest that FMRP contributes to *cen* RNA turnover and translational repression. The finding  
325 that younger *fmr1* mutant embryos show precocious and enhanced *cen* granule formation,  
326 despite WT levels of *cen* RNA, argues that changes in *cen* RNA localization and expression  
327 levels may be uncoupled and suggests that FMRP contributes to multiple aspects of *cen* RNA  
328 post-transcriptional regulation, either directly or indirectly.

329

### 330 ***cen* and FMRP functionally interact to regulate cell division and embryonic viability**

331 FMRP has established roles in progression through cell division. In neural progenitors, FMRP  
332 regulates proliferative capacity (Callan et al., 2010; Luo et al., 2010). In *Drosophila* embryos,  
333 loss of FMRP results in severe mitotic defects, including improper centrosome separation and  
334 loss of mitotic synchrony (Deshpande et al., 2006). In addition, many *fmr1* embryos form  
335 chromosome bridges or show evidence of lagging chromosomes or nuclear fallout, a  
336 developmental response to DNA damage resulting in the ejection of nuclei from the syncytial  
337 blastoderm cortex (Deshpande et al., 2006; Sullivan, Fogarty, & Theurkauf, 1993). Later in  
338 embryogenesis, loss of *fmr1* is also associated with defects in mitotic progression and

339 cellularization (Monzo et al., 2006; Papoulas et al., 2010). Using hatch rate analysis as a  
340 measure of embryonic viability, we found that while *fmr1* mutants show an average of 6.3%  
341 unhatched embryos, *cen* hemizyosity partially restored viability (Table 1). Western blot  
342 analysis confirmed that *cen* hemizyosity normalized Cen protein levels in *fmr1* embryos (Fig.  
343 5E and E'). These data are consistent with a genetic interaction between *cen* and *fmr1*;  
344 moreover, they implicate elevated Cen dosage as a driver of *fmr1*-mediated embryonic lethality.

345 To directly test if *cen* genetically modifies the mitotic defects observed in *fmr1* mutant  
346 embryos, we tabulated the incidence of abnormal microtubule spindles. Occasionally, even WT  
347 embryos contained aberrant microtubule spindles (3.7%, N=1/27 embryos; Fig. 5F). However,  
348 *cen* mutant embryos showed an increased rate of spindle errors (40.9%, N=9/22 embryos; Fig.  
349 5G, arrowheads), consistent with prior observations (Bergalet et al., 2020; Kao & Megraw,  
350 2009). Similarly, loss of *fmr1* was associated with high rates of spindle defects (76.1%, N=16/21  
351 embryos; Fig. 5H, arrow). We also noted areas of lower nuclear density in *fmr* embryos,  
352 consistent with nuclear fallout (Fig. 5H, dashed lines). In contrast, reducing *cen* dosage in the  
353 context of the *fmr1* null background partially rescued the incidence of mitotic spindle defects  
354 (48.1%, N= 13/27 embryos; Fig 5I). Together, these data demonstrate that normal dosage of  
355 Cen is required for error-free mitosis and that the upregulation of *cen* in *fmr1*-null embryos  
356 contributes to an increased rate of spindle errors and embryonic lethality.

357

### 358 ***Ectopic cen localization disrupts nuclear divisions***

359 Our data support a model whereby the local concentration of *cen* contributes to proper cell cycle  
360 progression. To directly test this model, we engineered a chimeric RNA comprising the *cen*  
361 coding sequence and the *bicoid* (*bcd*) 3'UTR, previously shown to be sufficient to mislocalize  
362 target RNAs to the anterior pole (Macdonald & Struhl, 1988). For these experiments, we  
363 examined embryos from mothers expressing the *cen-bcd 3'UTR* transgene in the context of the  
364 *cen* null background (hereafter, *cen-bcd 3'UTR* embryos).

365 We first confirmed our transgenic construct successfully mistargeted *cen* RNA to the  
366 anterior. Pre-blastoderm *cen-bcd 3'UTR* embryos (aged ~0–30 min), showed a crescent of *cen*  
367 RNA at the anterior pole (Fig. 6A). Immunofluorescence revealed that Cen protein is translated  
368 and also localized to the anterior of young *cen-bcd 3'UTR* embryos (Fig. 6A). Immunoblotting  
369 showed Cen protein is expressed in *cen-bcd 3'UTR* embryos at levels comparable to *fmr1*  
370 mutants (mean 3.3-fold increased relative to WT controls,  $P=0.03$  by unpaired t-test; Fig. 6  
371 Supplement 1A, A'). Given the restricted localization of *cen* to the anterior pole, the local  
372 concentration of *cen* mRNA and protein is expected to be significantly higher than normal.

373 At the anterior of *cen-bcd-3'UTR* embryos, *cen* RNA and protein coalesced into RNPs,  
374 which were much larger than the typical *cen* granules observed in WT (Fig. 6B). These large  
375 RNPs were also prominent during NC 10, when *cen* normally exists as single molecules (Fig. 6  
376 Supplement 1B). Through the use of reporter constructs, it was recently demonstrated that the  
377 *cen* coding sequence is sufficient for centrosome targeting (Bergalet et al., 2020). Consistent  
378 with this idea, the enlarged *cen* RNPs observed in *cen-bcd-3'UTR* embryos retained the ability  
379 to associate with centrosomes (dashed circle, Fig. 6C and Fig. 6 Supplement 1B). These data  
380 suggest that the normal temporal and spatial pattern of *cen* RNA localization requires sequence  
381 or structural elements encoded within the native *cen 3'UTR*.

382 We did not observe *cen* RNA or protein localized to distal centrosomes in *cen-bcd*  
383 *3'UTR* embryos, suggesting that localization elements within the *bcd 3'UTR* confine *cen*  
384 localization to the anterior pole. Moreover, this finding suggests that proper localization of *cen*  
385 mRNA is required for Cen localization to centrosomes. The restricted localization of *cen* mRNA  
386 and protein to the anterior pole within *cen-bcd 3'UTR* embryos allowed us to test whether *cen*  
387 was required locally for error-free mitosis. Examination of mitotic spindles at ~50% egg-length  
388 within *cen-bcd 3'UTR* embryos revealed an increased rate of microtubule spindle defects  
389 (47.6%,  $N=10/21$  embryos; Fig. 6D), indicating that *cen* functions locally to support normal  
390 spindle morphogenesis.

391 Notably, the anterior pole of *cen-bcd 3'UTR* embryos showed lower nuclear density (i.e.,  
392 nuclear fallout), dysmorphic nuclei, and mitotic asynchrony, showcasing significant disruption to  
393 nuclear divisions (Fig. 6B and E). To further characterize the underlying mechanisms  
394 responsible for the nuclear division defects observed at the anterior region of *cen-bcd-3'UTR*  
395 embryos, we examined their mitotic spindles. We found severe disruptions to microtubule  
396 organization in these embryos, as well as nuclei associated with supernumerary centrosomes  
397 (Fig. 6E). Quantification revealed that 85% of *cen-bcd-3'UTR* embryos showed spindle defects  
398 at the anterior (N=17/20 embryos). In contrast, spindle defects occurred less frequently in  
399 control embryos (N=2/21 embryos; similar results observed in N=3 independent replicates for  
400 both genotypes).

401 Given these phenotypes, we next examined embryonic viability. While *cen* mutant  
402 embryos show an elevated rate of unhatched embryos relative to controls, consistent with prior  
403 work (mean 10.7% unhatched; (Kao & Megraw, 2009), *cen-bcd 3'UTR* embryos showed  
404 increased lethality (mean 19.2%; P=0.049 relative to *cen* by unpaired t-test; Table 1). We  
405 propose a model in which the deregulated balance of Cen levels impairs mitotic spindle  
406 organization (Fig. 7). Collectively, our data suggest that temporal and spatial regulation of *cen*  
407 RNA at centrosomes is required for error-free mitosis and embryonic viability.

408

## 409 **Discussion**

410 Centrosome-localized RNA has been described in a variety of organismal contexts, and while  
411 the conserved feature of mRNA at centrosomes hints at a biological function, the underlying  
412 physiological significance has remained unclear (Marshall & Rosenbaum, 2000; Ryder & Lerit,  
413 2018). To begin to resolve this question, we systematically examined five transcripts predicted  
414 to enrich near spindle poles, and we quantitatively characterized their common and unique  
415 localization patterns in interphase and mitotic *Drosophila* embryos. We identified subsets of  
416 mRNAs showing centrosome enrichment in a cell cycle and developmentally regulated manner.



417 These non-random variances in RNA distributions over time further imply biological relevance.  
418 We directly tested if RNA localization contributes to normal centrosome functions through in-  
419 depth studies with the model transcript *cen*. We identified FMRP as an RNA-binding protein  
420 required for the regulation of *cen* RNA localization, organization, and translational control.  
421 Further, we showed that reducing *cen* dosage ameliorates *fmr1*-dependent mitotic errors and  
422 embryonic lethality. We also directly tested the consequences of mistargeting *cen* mRNA.  
423 Mislocalization of *cen* mRNA to the anterior abrogated the normal localization of Cen to more  
424 distal centrosomes and disrupted spindle organization. Anterior mitotic divisions were also  
425 severely disrupted due to the increased local concentration of Cen. These studies suggest that  
426 a normalized local concentration of *cen* is essential for normal cell division and genome stability.  
427

#### 428 *Centrosomes as platforms for translational regulation*

429 FMRP is a multifunctional RNA-binding protein with roles in translational repression, activation,  
430 RNA localization, and RNA stability (Darnell, 2011; Estes, O'Shea, Clasen, & Zarnescu, 2008;  
431 Greenblatt & Spradling, 2018; Pilaz, Lennox, Rouanet, & Silver, 2016). In humans, mutations in  
432 the gene encoding FMRP, *FMR1*, are the leading cause of heritable intellectual disability and  
433 autism. As a result, numerous high-throughput studies have identified putative RNA substrates,  
434 although surprisingly few of these have been validated (Santoro, Bray, & Warren, 2012). Our  
435 studies demonstrate that *cen* is regulated by FMRP, either directly or indirectly, and that titrating  
436 *cen* dosage is sufficient to partially restore embryonic viability in *fmr1* mutants. Consistent with  
437 direct regulation of *cen* by FMRP, the *cen* coding sequence contains six putative binding motifs  
438 for FMRP, according to RBPmap, an RNA-binding motif predictor (Paz, Kosti, Ares, Cline, &  
439 Mandel-Gutfreund, 2014). Moreover, human orthologs of *cen*, *CDR2* and *CDR2L*, were  
440 identified as direct FMRP targets by PAR-CLIP (photoactivatable ribonucleoside-enhanced  
441 crosslinking and immunoprecipitation) (Ascano et al., 2012). Deregulation of *CDR2* and *CDR2L*  
442 is associated with paraneoplastic cerebellar degeneration, indicating that their altered levels or

443 activities contribute to neural degeneration (Albert et al., 1998; Corradi, Yang, Darnell, Dalmau,  
444 & Darnell, 1997). Our studies suggest *Drosophila cen* may serve as a valuable model to  
445 uncover mechanisms underlying FMRP-mediated regulation of *CDR2* and *CDR2L*.

446 The enhanced recruitment of *cen* to heterogeneously sized pericentrosomal granules,  
447 coupled with the increased production of Cen protein within *fmr1* mutants, led us to speculate  
448 that *cen* granules may be sites of local translation, as was recently proposed (Bergalet et al.,  
449 2020). However, disruption of *cen* granule formation, as in *cnh<sup>B4</sup>* mutants, does not impair total  
450 Cen protein levels. This finding raises the possibility that Cen may be translated at alternate  
451 sites or that maternal stores of Cen obscure changes resulting from *cen* granule loss.

452 Nonetheless, our data suggest that centrosomes serve as platforms for translation control,  
453 which may be positive or negative depending on the specific transcript and/or cell cycle stage.  
454 We propose a model, wherein *cen* granules are sites of Cen translational regulation (Fig. 7).  
455 Our data suggest that FMRP functions as a negative regulator of *cen*, limiting Cen expression  
456 and, consequently, *cen* granule size and bulk enrichment at centrosomes. In the absence of  
457 FMRP, Cen expression becomes deregulated and may help recruit additional *cen* mRNA  
458 molecules from the cytoplasm to enlarged pericentrosomal granules. An imbalance of Cen  
459 levels at centrosomes – either too little (as in *cen* mutants) or too much (as in *fmr* mutants or  
460 *cen-bcd-3'UTR* embryos) – impairs centrosome function/spindle integrity and embryonic  
461 viability. Given our finding that loss of *fmr* does little to *cen* localization in mitotic embryos, we  
462 speculate that FMRP normally represses *cen* during interphase. Cen expression may normally  
463 be derepressed upon mitotic onset to permit local translation.

464

#### 465 *Differential enrichment of mRNAs on interphase centrosomes*

466 A common trend emerging from our comparative analyses is the greater enrichment of RNA at  
467 centrosomes during interphase versus metaphase, as exemplified by *cen*, *cyc B*, *plp*, and *sov*.  
468 One possible explanation is the differential size of interphase centrosomes, which are

469 significantly larger in *Drosophila* embryos due to the elaboration of extended centrosome flares,  
470 part of the architecture of the centrosome scaffold (Lerit et al., 2015; Megraw et al., 2002;  
471 Richens et al., 2015). This pattern contrasts with mammalian centrosomes, which are smaller in  
472 interphase and larger in mitosis (Lawo, Hasegan, Gupta, & Pelletier, 2012). According to this  
473 size model, a larger centrosome might nonspecifically recruit or dock additional RNAs simply  
474 due to the increased volume it occupies in the cell. We discount this model based on our finding  
475 that a highly expressed control transcript, *gapdh*, does not enrich at interphase centrosomes.  
476 This result also argues against the idea that centrosomes non-specifically recruit RNA  
477 molecules spuriously. Relatively few RNAs localize to centrosomes, while many others do not  
478 (Lécuyer et al., 2007; Raff et al., 1990). Here, we show the localization of centrosome-  
479 associated RNA is regulated in space and time.

480         Why do RNAs localize to interphase centrosomes? Recent work in mammalian cells  
481 proposed that some lengthy transcripts may be cotranslationally transported to centrosomes  
482 (Sepulveda et al., 2018). This model would account for contemporaneous recruitment and  
483 colocalization of centrosome RNA and proteins. If some centrosome transcripts utilize  
484 cotranslational transport, *sov* may prove to be an exception. Of the RNAs overlapping with the  
485 centrosome surface, *sov* was unique in that it appeared to preferentially dock along centrosome  
486 flares, localizing to the outer PCM zone. However, we do not detect *Sov* at centrosomes.  
487 Instead, *Sov* resides in the nucleus during interphase and is undetectable after nuclear  
488 envelope breakdown (Benner et al., 2019). These findings suggest that *Sov* is rapidly  
489 translocated into the nucleus. Live imaging of RNA transport and nascent protein synthesis is  
490 required to rigorously test the dynamics of RNA localization and local translation.

491         Another model that may account for enrichment of centrosome RNAs at interphase  
492 centrosomes is the possibility that RNA contributes to centrosome structure, perhaps as a  
493 component of the PCM scaffold itself. Recent work has suggested that phase transitions may  
494 contribute to PCM structure and function (Woodruff et al., 2017; Woodruff et al., 2015; Zwicker,

495 Decker, Jaensch, Hyman, & Jülicher, 2014). A common principle of phase transitions is the  
496 association of intrinsically disordered proteins with specific RNA molecules to form non-  
497 membrane bound organelles with unique biophysical properties (Berry, Brangwynne, & Haataja,  
498 2018). Centrosome-associated RNA may function as a physiological crowding agent  
499 contributing to phase transitions of the PCM. A related intriguing question raised by our work is  
500 if *cen* granules represent phase-separated domains. Cen protein contains multiple predicted  
501 intrinsically disordered domains, which is congruous with phase-separation (Ishida & Kinoshita,  
502 2007). While we cannot rule out the contribution of all centrosome-enriched RNAs, our studies  
503 do not support a model for *cen* RNA contributing to centrosome structure. Mistargeting *cen* to  
504 the anterior cortex did not appear to disrupt the organization of distal centrosomes, for example.

505         Critically, disrupting the PCM scaffold is sufficient to inhibit *cen* granule formation. We  
506 previously showed that the PCM scaffold becomes progressively more structured during the  
507 prolonged interphases of later NCs (Lerit et al., 2015). Additionally, the mother centrosome  
508 organizes a larger PCM scaffold due to inherently greater levels of Cnn and PLP (Conduit et al.,  
509 2010; Lerit et al., 2015). Collectively, these features may account for the asymmetric localization  
510 of *cen* granules to mother centrosomes in late-stage syncytial embryos. These data lead us to  
511 conclude that the PCM scaffold organized by Cnn and PLP is upstream of the recruitment and  
512 organization of *cen* RNA granules (Fig. 7).

513

#### 514 *Towards an understanding of the post-transcriptional regulation of centrosomal RNAs*

515 Our finding that some population of most pericentrosomal RNAs organize into higher-order  
516 granules hints that these structures might represent regulatory RNPs. Many types of RNP  
517 granules form within cells, including stress granules, germ granules, P-bodies, etc., which all  
518 have unique functions and modes of assembly. The spatial proximity of multiple RNA molecules  
519 may facilitate intermolecular RNA interactions subsequently recognized by RNA-binding  
520 proteins (Van Treeck & Parker, 2018). While the FMRP-containing *cen* granule represents one

521 such RNP, an area of active investigation in our lab is the functional characterization of other  
522 centrosomal RNAs. As the early *Drosophila* embryo is transcriptionally quiescent, post-  
523 transcriptional regulatory mechanisms, and especially translational control, are fundamentally  
524 important for proper centrosome regulation and function.  
525

526 **Methods**

527 **Fly stocks**

528 The following *Drosophila* strains and transgenic lines were used:  $y^1w^{1118}$  (Bloomington  
529 *Drosophila* Stock Center, BDSC #1495) was used as the WT control unless otherwise noted;  
530  $P_{BAC}\text{-GFP-Cnn}$ , which expresses Cnn tagged at the N-terminus with EGFP under endogenous  
531 regulatory elements (Lerit et al., 2015);  $Ubi\text{-GFP-}\gamma\text{-Tub23C}$  expresses  $GFP\text{-}\gamma\text{-Tub}$  under the  
532 *Ubiquitin* promoter (Lerit & Rusan, 2013); null *cen* mutant embryos derive from homozygous  
533  $cen^{f04787}$  animals (BDSC #18805) (Kao & Megraw, 2009); null *fmr1* mutant embryos derive from  
534  $fmr1^{\Delta113M}/fmr^3$  trans-heterozygotes ( $fmr1^{\Delta113M}$  BDSC #67403) (Zhang et al., 2001);  $fmr^3$  gift from  
535 T. Jongens, UPenn) (Dockendorff et al., 2002); and hypomorphic  $cnn^{B4}$  mutants were a gift from  
536 T. Megraw (Florida State University). The *maternal*  $\alpha\text{-Tub}$  promoter was used to control *GAL4*  
537 expression ( $matGAL4$ ; BDSC #7063) to drive expression of  $pUASp\text{-}cen\text{-}bcd\text{-}3'UTR$  (this study).  
538  $FMRP\text{-GFP}$  is a recombineered line expressing FMRP tagged at the C-terminus with GFP  
539 under endogenous regulatory elements (gift from M. Ramaswami, Trinity College Dublin)  
540 (Sudhakaran et al., 2014). In all experiments, mutant embryos represent progeny derived from  
541 mutant mothers to examine maternal effects. Flies were raised on molasses-based *Drosophila*  
542 medium, and crosses were maintained at 25°C in a light and temperature-controlled chamber.

543

544 **Construction of transgenic animals**

545 To generate  $pUASp\text{-}cen\text{-}bcd\text{-}3'UTR$ , the *cen* coding sequence was PCR amplified using  
546 Phusion high-fidelity DNA polymerase from the cDNA clone LD41224 (*Drosophila* Genomics  
547 Resource Center (DGRC)) using the primers 5'-GCAGGCTCCGCGGCCGCCCCCTTCACCAG-  
548 GATGGAGGAATCCAATCACGGTTC-3' and 5'-GAAACTCTCTAACAGCCTCTCATCCAGGT-

549 TACTTTTGACGAAACTGATGATGATGACTC-3'. The *bcd*-3'UTR was PCR amplified using Q5  
550 high-fidelity polymerase (New England Biolabs, M0491S) from genomic DNA using the primers  
551 5'-GAGTCATCA-  
552 TCATCAGTTTCGTCAAAAGTAACCTGGATGAGAGGCGTGTTAGAG-3' and 5'-CTGGGTCTG-  
553 GCGCGCCCACCCTTGTCTAGGTAGTTAGTCACAATTTACCCGAGTAGAGTAG-3'. The *cen*  
554 start and stop codons are underlined. The *cen-bcd*-3'UTR fusion was assembled and  
555 directionally cloned into the pENTR-D vector (Invitrogen) by Gibson assembly using 5-fold molar  
556 excess of the *bcd*-3'UTR. Sequence-verified single colony clones were shuttled into the  
557 destination vector pPW (UASp promoter) using the Gateway cloning system (Invitrogen).  
558 Transgenic animals were generated by BestGene, Inc.

559

#### 560 **Embryonic hatch rate analysis**

561 24-hr collections of eggs were collected on yeasted grape juice agar plates, transferred to fresh  
562 grape juice agar plates, and aged for 48-hr at 25 °C. Unhatched embryos were counted from a  
563 total of ~600 embryos, and data presented are mean  $\pm$  S.D. from 3 biological replicates.

564

#### 565 **Immunofluorescence**

566 Embryos were prepared for immunofluorescence as described in Lerit et al. 2015. Briefly,  
567 samples were fixed in paraformaldehyde, blocked extensively in BBT (PBS supplemented with  
568 0.1% Tween-20 and 0.1% BSA, or 0.5% BSA for Asl staining), then incubated overnight at 4°C  
569 with primary antibodies diluted in BBT. The next day, samples were further blocked in BBT  
570 supplemented with 2% normal goat serum (NGS) and then incubated with secondary antibodies  
571 and DAPI for 2 hr at room temperature prior to mounting in AquaPoly/Mount mounting medium  
572 (VWR, 87001-902).

573 The following primary antibodies were used: rabbit anti-Cen (1:500; gift from T. Megraw,

574 Florida State University) (Kao & Megraw, 2009), rabbit anti-Cnn (1:3500; gift from T. Megraw),  
575 guinea pig anti-Asl (1:3000; gift from G. Rogers, University of Arizona), mouse anti- $\alpha$ -Tub DM1 $\alpha$   
576 (1:500; Sigma, T6199), rabbit anti-Egl (1:2000; gift from R. Lehmann, New York University),  
577 rabbit anti-Pum (1:1000; gift from Martine Simonelig, Institute of Human Genetics, University of  
578 Montpellier), mouse anti-Orb2 (1:1000; Developmental Studies Hybridoma Bank (DSHB) clone  
579 4G8), mouse anti-Me31b (1:3000; gift from A. Nakamura, Kumamoto University); and mouse  
580 anti-FMRP (1:10; DSHB clone 5A11).

581 Secondary antibodies and stains: Alexa fluor 488, 568, or 647 (1:500, Molecular  
582 Probes). DAPI was used at 10 ng/mL (Thermo Fisher).

583

#### 584 **Detection of RNA by smFISH**

585 smFISH experiments were adapted from manufacturer's recommended protocols. All steps  
586 were performed with RNase-free solutions. Briefly, fixed and rehydrated embryos were washed  
587 in PBST (PBS plus 0.1% Tween-20) then washed in wash buffer (WB; 10% formamide and 2x  
588 saline sodium citrate (SSC) supplemented fresh each experiment with 0.1% Tween-20 and 2  
589  $\mu$ g/mL nuclease-free BSA (VWR, 0332-25G)). Embryos were then incubated with 100  $\mu$ L of  
590 hybridization buffer (HB; 100 mg/mL dextran sulfate and 10% formamide in 2x SSC  
591 supplemented fresh each experiment with 0.1% Tween-20, 2  $\mu$ g/mL nuclease-free BSA, and 10  
592 mM ribonucleoside vanadyl complex (RVC; New England Biolabs, S1402S) for 10-20 minutes in  
593 a 37°C water bath. Stellaris smFISH probes conjugated to Quasar 570 dye (LGC Biosearch  
594 Technologies) were designed against the coding region for each gene of interest using the  
595 Stellaris RNA FISH probe designer and stored at -20 °C as stock solutions of 25  $\mu$ M in  
596 nuclease-free water. See Fig. 1 Supplemental Table 3 for detailed information regarding probes.  
597 After pre-incubation in HB, embryos were incubated in a 37 °C water bath overnight in 25  $\mu$ L of  
598 HB containing a 1:50 dilution of smFISH probe. The next morning, embryos were washed three



599 times for 30 min each in pre-warmed WB, stained with DAPI for 1 hr at room temperature,  
600 washed with PBST, then mounted with Vectashield mounting medium (Vector Laboratories, H-  
601 1000). Slides were stored at 4 °C and imaged within 1 week.

602 For experiments where immunofluorescence was combined with smFISH, we adapted a  
603 protocol from Xu et al., 2015. Following an overnight incubation with smFISH probes, embryos  
604 were washed well in WB, followed by two 10 min washes in 2x SSC-0.1% Tween-20, and then  
605 four 10 min washes in PBST. Embryos were then blocked for two hours in blocking solution  
606 (PBS supplemented with 1 mg/mL nuclease-free BSA, 0.1% Tween-20, and 2 mM RVC,  
607 prepared fresh), then incubated overnight in primary antibodies at 4 °C. The next day, embryos  
608 were washed well in blocking solution, incubated with secondary antibodies and DAPI at room  
609 temperature, then washed in PBST prior to mounting in Vectashield.

610

### 611 **Proximity Ligation Assays**

612 Proximity ligation assays were performed using the Sigma Duolink PLA kit (DUO92101)  
613 following manufacturer's recommendations with minor modification. Fixed and rehydrated  
614 embryos were incubated in 1 drop (~ 40 µL) of the Duolink blocking solution at 37 °C for 60 min  
615 without nutation. Embryos were then incubated in primary antibodies diluted in BBT (PBS, 0.1%  
616 Tween-20, and 0.5% BSA) overnight at 4 °C. The next day, embryos were washed with Duolink  
617 Wash Buffer A twice for 5 min, incubated with 40 µL of Duolink PLA probes diluted 1:5 in  
618 Duolink antibody diluent for 60 min at 37 °C, re-washed in Wash Buffer A, incubated with  
619 Duolink Ligase diluted 1:40 in 1x Duolink Ligation Buffer at 37 °C for 30 min, and then re-  
620 washed with Wash Buffer A. The amplification step was then performed using 0.5 µL of  
621 polymerase diluted in 40 µL of 1x amplification buffer at 37 °C for 100 minutes. Finally, embryos  
622 were incubated with DAPI diluted in Wash Buffer B for 15 min, washed twice in Wash Buffer B,  
623 and mounted in Vectashield. Slides were stored at -20 °C and imaged within 48 hours.

624 The following primary antibody pairs were used: rabbit anti-Cen (1:500) and mouse anti-  
625 FMRP (1:10, DSHB); negative controls included rabbit anti-Cnn (1:3500) and mouse anti-GFP  
626 (1:1000; DSHB clone 4C9) and no primary antibodies.

627

### 628 **Microscopy**

629 Images were acquired on a Nikon Ti-E system fitted with a Yokogawa CSU-X1 spinning disk  
630 head, Hamamatsu Orca Flash 4.0 v2 digital CMOS camera, Perfect Focus system, and a Nikon  
631 LU-N4 solid state laser launch (15 mW 405, 488, 561, and 647 nm) using the following  
632 objectives: 100x 1.49 NA Apo TIRF oil immersion, 40x 1.3 NA Plan Fluor oil immersion, and 20x  
633 0.75 NA Plan Apo. This microscope was powered through Nikon Elements AR software on a  
634 64-bit HP Z440 workstation.

635

### 636 **Image analysis**

637 Images were assembled using Fiji (NIH) (Schindelin et al., 2012), Adobe Photoshop, and Adobe  
638 Illustrator software to separate or merge channels, crop regions of interest, generate maximum-  
639 intensity projections, and adjust brightness and contrast.

640

### 641 *RNA detection and measurements*

642 For quantification of single molecule RNA distribution relative to centrosomes, Nikon .nd2 files  
643 were first opened in Fiji, split into individual channels, and saved as .tif files using a custom  
644 macro. Raw images were then segmented using code adapted from the Allen Institute for Cell  
645 Science Cell Segmenter (Chen et al., 2018). Images were processed in batch using custom  
646 code written in Python and implemented using Jupyter notebooks. To minimize bias, we applied  
647 the same segmentation code to segment RNA objects under different biological conditions.  
648 Each segmented image was compared to the original image to validate accurate segmentation.  
649 RNA objects  $\geq 50$  pixels in segmented images were identified using the scikit-image tool label

650 (van der Walt et al., 2014). Object features were then extracted using the regionprops tool from  
651 scikit-image. Extracted features included the raw image total pixel intensity, the object centroid  
652 coordinates, and the surface coordinates. These features were stored in a relational database  
653 using PostgreSQL.

654 For each image, the distances between centroid RNA coordinates and centroid  
655 centrosome coordinates was measured using the numpy vector normalization tool norm (van  
656 der Walt, Colbert, & Varoquaux, 2011). We then measured the distance between surface  
657 coordinates for a select number of RNA-centrosome pairs. Approximately 100 RNA objects  
658 were manually inspected to compare distances measured using centroid coordinates compared  
659 to distances measured using surface coordinates. The closest surface-to-surface distance for  
660 any given RNA corresponded to a centrosome in the top two closest centroid distance  
661 measurements. For this reason, the three closest centrosomes detected by centroid distance  
662 measurements were selected for surface measurements, to ensure that the closest centrosome  
663 was detected. This approach minimized processing time. The distance between the surface of  
664 each RNA object and its closest centrosome was recorded in the PostgreSQL database.

665 For single molecule normalization, we defined single molecules of RNA as RNA objects  
666 containing 50-100 pixels. These thresholds were selected based on the diffraction-limited 200  
667 nm size of single RNA molecules detected by smFISH. For each RNA probe, we divided the  
668 integrated intensity of each RNA object by the averaged integrated intensity of all single RNA  
669 molecules, allowing an approximation of the number of RNA molecules per object, as previously  
670 described (Mueller et al., 2013). We then calculated the percentage of total RNA and  
671 percentage of total RNA in granules within a given distance from the centrosome (50 nm steps  
672 up to the pseudocell radius). We selected 10  $\mu\text{m}$  and 4  $\mu\text{m}$  as the pseudocell radius for NC 10  
673 and NC 13, respectively, based on measuring the centrosome-to-centrosome distances from a  
674 set of representative images. The mean  $\pm$  S.D. of the cumulative distributions were visualized  
675 using the Seaborn lineplot tool (Waskom et al., 2018).

676

677 *Spindle morphology defects*

678 Mitotic embryos imaged at 40x were examined for the following morphologies: bent spindles,  
679 multipolar or fused spindles, acentrosomal spindle poles, and defective centrosome separation.  
680 If any spindles within an embryo contained one of these phenotypes, the embryo was  
681 considered positive for a spindle morphology defect. Three independent biological replicates  
682 were performed for each genotype.

683

684 **Immunoblotting**

685 Aged embryos were harvested, dechorionated in bleach, flash frozen in liquid nitrogen, and  
686 stored at -80 °C. 5-10 mg of frozen embryos were lysed with a 1 mL glass dounce homogenizer  
687 (Wheaton) in 100  $\mu$ L lysis buffer (50 mM HEPES, 150 mM NaCl, 2.5 mM MgCl<sub>2</sub>, 0.1% Triton X-  
688 100, and 250 mM sucrose supplemented with 1x EDTA-free protease inhibitor cocktail (Roche,  
689 04693159001), 1  $\mu$ g/mL Pepstatin A (Sigma, P5318), 1 mM DTT (Sigma, 10197777001), and 2  
690 mM RVC). 25  $\mu$ L of 5x SDS loading dye was added to each lysate and samples were boiled for  
691 10 min at 95 °C then resolved by SDS-PAGE gel and transferred to nitrocellulose membrane by  
692 wet transfer. Membranes were blocked for 1 hr at room temperature in a 5% dry milk solution  
693 diluted in TBST (Tris-based saline with 0.05% Tween-20), washed well with TBST, and  
694 incubated overnight at 4 °C with primary antibodies. After washing with TBST, membranes were  
695 incubated for 1 hr in the following secondary antibodies diluted 1:5000 in TBST, 5% milk: goat  
696 anti-mouse HRP (Thermo Fisher, 31430) and goat anti-rabbit HRP (Thermo Fisher, 31460).  
697 Membranes were washed well in TBST, and bands were visualized with Clarity ECL substrate  
698 (Bio-Rad, 1705061) on a Bio-Rad ChemiDoc imaging system.

699 Densitometry was measured using Fiji software using the ROI measure tool. For each  
700 sample, the ratio between the protein of interest and a loading control (e.g.  $\beta$ -Tub) was

701 calculated. The mean relative expression and standard deviation were calculated and  
702 normalized to the mean of the biological control. Three independent biological replicates were  
703 processed on the same gel.

704 The following primary antibodies were used: rabbit anti-Cen (1:1000; gift from T.  
705 Megraw), mouse anti-FMRP (1:100; DSHB clone 5A11); mouse anti- $\beta$ -Tub (1:1000; DSHB E7);  
706 and mouse anti-Actin (1:1000; DSHB clone JLA20).

707

### 708 **Immunoprecipitation**

709 ~30 mg of frozen embryos were lysed with a glass dounce in 100  $\mu$ L lysis buffer (50 mM  
710 HEPES pH 7.4, 150 mM NaCl, 2.5 mM MgCl<sub>2</sub>, 250 mM sucrose, 0.1% Triton X-100)  
711 supplemented with 1x protease inhibitor cocktail, 1  $\mu$ g/mL Pepstatin A, 1 mM DTT, 1U/ $\mu$ L  
712 RNase Inhibitor (New England Biolabs, M0314S), and 2 mM RVC. Lysates were cleared by  
713 centrifugation, and the supernatant was pre-cleared in 25  $\mu$ L of washed Protein A/G magnetic  
714 agarose beads (Pierce, 88802), or blocked magnetic beads (Chromotek, bmp-20) for GFP-Trap  
715 of FMRP, to reduce non-specific binding. 0.1-volumes of pre-cleared lysates were reserved as  
716 input, while the remainder was immunoprecipitated for 2 hr at 4°C in the following antibodies:  
717 rabbit anti-GFP (Invitrogen, A-11122), rabbit anti-Cen, or no antibodies as a control, then  
718 transferred to 25  $\mu$ L washed Protein A/G magnetic agarose beads for immunoprecipitation for 2  
719 hr. GFP-Trap magnetic agarose beads (Chromotek, gtma-10) were used for FMRP. Beads were  
720 then washed well in IP buffer (lysis buffer with 8 U/mL RNase Out and 0.4 mM RVC) then  
721 resuspended in 100  $\mu$ L IP buffer. 50  $\mu$ L of the beads (20% of volume for GFP-Trap) were  
722 analyzed for protein content by SDS-PAGE as described above. RNA was extracted from the  
723 other 50  $\mu$ L of beads (80% of volume for GFP-Trap) using TRI Reagent (Sigma, T9424) and  
724 then treated with TURBO DNase (Thermo Fisher, AM2238) prior to RT-PCR.

725 cDNA was synthesized from 500 ng of RNA using Superscript IV Reverse Transcriptase

726 (Thermo Fisher, 18091050) according to the manufacturer's protocol with (RT+) or without (RT-)  
727 reverse transcriptase. DNA was amplified by PCR using Phusion High Fidelity DNA Polymerase  
728 (New England Biolabs, M0530L).

729 The following primers were used:

730 *cen* forward 5'-TAACCGCAGACGGACAAC-3'

731 *cen* reverse: 5'-GAATGCCCTATGGCTAGAAT-3'

732 *gapdh* forward: 5'-CACCCATTCGTCTGTGTTTCG-3'

733 *gapdh* reverse: 5'-CAACAGTGATTCCCGACCAG-3'

734 *fmr* forward: 5'-CATCGTTTCGACGGAGTAACA-3'

735 *fmr* reverse: 5'-GGAGCTTGTTGTTGGCTGAT-3'

736

### 737 **qPCR**

738 RNA was extracted from ~ 5 mg of frozen embryos using TRI Reagent, treated with Ambion  
739 Turbo DNase (Thermo Fisher, AM2238) for 30 min at 37 °C, followed by phenol:chloroform  
740 extraction. On the same day, RNA concentrations were measured with a spectrophotometer,  
741 and cDNA was synthesized from 500 ng of RNA using the iScript kit according to the  
742 manufacturer's protocol (Bio-Rad, 170-8891).

743 qPCR was performed on a Bio-Rad CFX96 Real-time system with iTaq Universal SYBR  
744 Green Supermix (Bio-Rad, 172-5121). Three biological samples were tested in triplicate using  
745 96 well-plates (Bio-Rad, HSP9601). *cen* expression levels were normalized to Ribosomal  
746 protein L32 (*RP49*).

747 The following primers were used:

748 *cen* forward: 5'-TGAGGATACGACGCTCTGTG-3'

749 *cen* reverse 5'-AAAGTACCCCGGTAACACC-3', amplicon 78 bp;

750 *RP49* forward 5'-CATACAGGCCCAAGATCGTG-3'

751 *RP49* reverse 5'-ACAGCTTAGCATATCGATCCG-3', amplicon 75 bp.

752

753 **Statistical Analysis**

754 Data were plotted and statistical analysis was performed using Microsoft Excel and GraphPad  
755 Prism software. To calculate significance, the distribution normality was first assessed with a  
756 D'Agnostino and Pearson normality test. Data were then analyzed by Student's two-tailed t-test,  
757 ANOVA, or the appropriate nonparametric tests and are displayed as mean  $\pm$  SD. Data shown  
758 are representative results from at least two independent experiments, as indicated in the figure  
759 legends.

760 **Acknowledgements**

761 We received gifts of reagents from Drs. Liz Gavis, Nasser Rusan, Tim Megraw, Greg Rogers,  
762 Ruth Lehmann, Mani Ramaswami, Martine Simonelig, Akira Nakamura, and Tom Jongens. We  
763 are grateful to Lauren Lym and Jina Lee for assistance with timed embryo collections and hatch  
764 rate analysis, respectively. We are indebted to Drs. Liz Gavis, Nasser Rusan, and members of  
765 the Lerit lab for helpful discussions and critical reading of this manuscript. Stocks obtained from  
766 the Bloomington *Drosophila* Stock Center (NIH grant P40OD018537); antibodies from the  
767 Developmental Studies Hybridoma Bank, created by the NICHD of the NIH and maintained at  
768 the University of Iowa Department of Biology; and reagents from the *Drosophila* Genomics  
769 Resource Center (NIH grant 2P40OD010949) were all used in this study. This work was  
770 supported by NIH grants 5K12GM000680 and 1F32GM128407 to PVR, AHA grant  
771 20POST35210023 to JF, and NIH grant 5K22HL126922 to DAL.

772



773 **REFERENCES**

- 774
- 775 Albert, M. L., Darnell, J. C., Bender, A., Francisco, L. M., Bhardwaj, N., & Darnell, R. B.  
776 (1998). Tumor-specific killer cells in paraneoplastic cerebellar degeneration. *Nature*  
777 *medicine*, 4(11), 1321-1324. doi:10.1038/3315
- 778 Alliegro, M. C., & Alliegro, M. A. (2008). Centrosomal RNA correlates with intron-poor nuclear  
779 genes in *Spisula* oocytes. *Proceedings of the National Academy of Sciences of the United*  
780 *States of America*, 105(19), 6993-6997. doi:10.1073/pnas.0802293105
- 781 Alliegro, M. C., Alliegro, M. A., & Palazzo, R. E. (2006). Centrosome-associated RNA in surf  
782 clam oocytes. *Proceedings of the National Academy of Sciences of the United States of*  
783 *America*, 103(24), 9034-9038. doi:10.1073/pnas.0602859103
- 784 Anderson, K. V., & Lengyel, J. A. (1979). Rates of synthesis of major classes of RNA in  
785 *Drosophila* embryos. *Developmental Biology*, 70(1), 217-231. doi:10.1016/0012-  
786 1606(79)90018-6
- 787 Ascano, M., Mukherjee, N., Bandaru, P., Miller, J. B., Nusbaum, J. D., Corcoran, D. L., . . .  
788 Tuschl, T. (2012). FMRP targets distinct mRNA sequence elements to regulate protein  
789 expression. *Nature*, 492(7429), 382-386. doi:10.1038/nature11737
- 790 Banerjee, A., Ifrim, M. F., Valdez, A. N., Raj, N., & Bassell, G. J. (2018). Aberrant RNA  
791 translation in fragile X syndrome: From FMRP mechanisms to emerging therapeutic  
792 strategies. *Brain Research*, 1693(Pt A), 24-36. doi:10.1016/j.brainres.2018.04.008
- 793 Benner, L., Castro, E. A., Whitworth, C., Venken, K. J. T., Yang, H., Fang, J., . . . Lerit, D. A.  
794 (2019). *Drosophila* Heterochromatin Stabilization Requires the Zinc-Finger Protein Small  
795 Ovary. *Genetics*, 213(3), 877-895. doi:10.1534/genetics.119.302590
- 796 Bergalet, J., Patel, D., Legendre, F., Lapointe, C., Benoit Bouvrette, L. P., Chin, A., . . . Lecuyer,  
797 E. (2020). Inter-dependent Centrosomal Co-localization of the cen and ik2 cis-Natural  
798 Antisense mRNAs in *Drosophila*. *Cell Rep*, 30(10), 3339-3352 e3336.  
799 doi:10.1016/j.celrep.2020.02.047
- 800 Berry, J., Brangwynne, C. P., & Haataja, M. (2018). Physical principles of intracellular  
801 organization via active and passive phase transitions. *Reports on progress in physics*.  
802 *Physical Society (Great Britain)*, 81(4), 046601. doi:10.1088/1361-6633/aaa61e
- 803 Blower, M. D., Feric, E., & Heald, R. (2007). Genome-wide analysis demonstrates conserved  
804 localization of messenger RNAs to mitotic microtubules. *The Journal of Cell Biology*,  
805 179(7), 1365-1373. doi:10.1083/jcb.200705163
- 806 Callan, M. A., Cabernard, C., Heck, J., Luois, S., Doe, C. Q., & Zarnescu, D. C. (2010). Fragile  
807 X protein controls neural stem cell proliferation in the *Drosophila* brain. *Human*  
808 *Molecular Genetics*, 19(15), 3068-3079. doi:10.1093/hmg/ddq213
- 809 Chen, J., Ding, L., Viana, M. P., Hendershott, M. C., Yang, R., Mueller, I. A., & Rafelski, S. M.  
810 (2018). The Allen Cell Structure Segmenter: a new open source toolkit for segmenting  
811 3D intracellular structures in fluorescence microscopy images. *bioRxiv*, 1-27.  
812 doi:10.1101/491035
- 813 Conduit, P. T., Brunk, K., Dobbelaere, J., Dix, C. I., Lucas, E. P., & Raff, J. W. (2010).  
814 Centrioles regulate centrosome size by controlling the rate of Cnn incorporation into the  
815 PCM. *Current biology : CB*, 20(24), 2178-2186. doi:10.1016/j.cub.2010.11.011
- 816 Conduit, P. T., Feng, Z., Richens, J. H., Baumbach, J., Wainman, A., Bakshi, S. D., . . . Raff, J.  
817 W. (2014). The centrosome-specific phosphorylation of Cnn by Polo/Plk1 drives Cnn  
818 scaffold assembly and centrosome maturation. *Developmental Cell*, 28(6), 659-669.  
819 doi:10.1016/j.devcel.2014.02.013

- 820 Conduit, P. T., Wainman, A., & Raff, J. W. (2015). Centrosome function and assembly in animal  
821 cells. *Nature Publishing Group*, *16*(10), 611-624. doi:doi/10.1038/nrm4062
- 822 Corradi, J. P., Yang, C., Darnell, J. C., Dalmay, J., & Darnell, R. B. (1997). A post-  
823 transcriptional regulatory mechanism restricts expression of the paraneoplastic cerebellar  
824 degeneration antigen cdr2 to immune privileged tissues. *The Journal of Neuroscience*,  
825 *17*(4), 1406-1415. doi:10.1523/JNEUROSCI.17-04-01406.1997
- 826 Dalby, B., & Glover, D. M. (1992). 3' non-translated sequences in *Drosophila* cyclin B  
827 transcripts direct posterior pole accumulation late in oogenesis and peri-nuclear  
828 association in syncytial embryos. *Development (Cambridge, England)*, *115*(4), 989-997.  
829 doi:539E97C1-F7E3-4791-8B74-97D4C54BD115
- 830 Darnell, J. C. (2011). Defects in translational regulation contributing to human cognitive and  
831 behavioral disease. *Current opinion in genetics & development*, *21*(4), 465-473.  
832 doi:10.1016/j.gde.2011.05.002
- 833 Deák, P., Omar, M. M., Saunders, R. D., Pál, M., Komonyi, O., Szidonya, J., . . . Glover, D. M.  
834 (1997). P-element insertion alleles of essential genes on the third chromosome of  
835 *Drosophila melanogaster*: correlation of physical and cytogenetic maps in chromosomal  
836 region 86E-87F. *Genetics*, *147*(4), 1697-1722. doi:32FED1BA-423B-4CE8-A7CF-  
837 0EA6F798C3FC
- 838 Deshpande, G., Calhoun, G., & Schedl, P. (2006). The *drosophila* fragile X protein dFMR1 is  
839 required during early embryogenesis for pole cell formation and rapid nuclear division  
840 cycles. *Genetics*, *174*(3), 1287-1298. doi:10.1534/genetics.106.062414
- 841 Dienstbier, M., Boehl, F., Li, X., & Bullock, S. L. (2009). Egalitarian is a selective RNA-binding  
842 protein linking mRNA localization signals to the dynein motor. *Genes & development*,  
843 *23*(13), 1546-1558. doi:10.1101/gad.531009
- 844 Dockendorff, T. C., Su, H. S., McBride, S. M. J., Yang, Z., Choi, C. H., Siwicki, K. K., . . .  
845 Jongens, T. A. (2002). *Drosophila* lacking *dfmr1* activity show defects in circadian output  
846 and fail to maintain courtship interest. *Neuron*, *34*(6), 973-984. doi:10.1016/s0896-  
847 6273(02)00724-9
- 848 Estes, P. S., O'Shea, M., Clasen, S., & Zarnescu, D. C. (2008). Fragile X protein controls the  
849 efficacy of mRNA transport in *Drosophila* neurons. *Molecular and cellular*  
850 *neurosciences*, *39*(2), 170-179. doi:10.1016/j.mcn.2008.06.012
- 851 Foe, V. E., & Alberts, B. M. (1983). Studies of nuclear and cytoplasmic behaviour during the  
852 five mitotic cycles that precede gastrulation in *Drosophila* embryogenesis. *Journal of Cell*  
853 *Science*, *61*, 31-70. doi:2ABE2954-C06E-42D4-AFF0-6391BB6933DD
- 854 Freeman, M., Nüsslein-Volhard, C., & Glover, D. M. (1986). The dissociation of nuclear and  
855 centrosomal division in *gnu*, a mutation causing giant nuclei in *Drosophila*. *Cell*, *46*(3),  
856 457-468. doi:055D5884-3A0A-4DE2-8794-71D0D291186A
- 857 Gamberi, C., Johnstone, O., & Lasko, P. (2006). *Drosophila* RNA Binding Proteins. In (*null*)  
858 (Vol. 248, pp. 43-139): Elsevier.
- 859 Graveley, B. R., Brooks, A. N., Carlson, J. W., Duff, M. O., Landolin, J. M., Yang, L., . . .  
860 Celniker, S. E. (2011). The developmental transcriptome of *Drosophila melanogaster*.  
861 *Nature*, *471*(7339), 473-479. doi:doi/10.1038/nature09715
- 862 Greenblatt, E. J., & Spradling, A. C. (2018). Fragile X mental retardation 1 gene enhances the  
863 translation of large autism-related proteins. *Science*, *361*(6403), 709-712.  
864 doi:10.1126/science.aas9963

- 865 Ishida, T., & Kinoshita, K. (2007). PrDOS: prediction of disordered protein regions from amino  
866 acid sequence. *Nucleic Acids Research*, *35*(Web Server issue), W460-464.  
867 doi:10.1093/nar/gkm363
- 868 Kao, L.-R., & Megraw, T. L. (2009). Centrocortin Cooperates with Centrosomin to Organize  
869 Drosophila Embryonic Cleavage Furrows. *Current Biology*, *19*(11), 937-942.  
870 doi:10.1016/j.cub.2009.04.037
- 871 Lambert, J. D., & Nagy, L. M. (2002). Asymmetric inheritance of centrosomally localized  
872 mRNAs during embryonic cleavages. *Nature*, *420*(6916), 682-686.  
873 doi:10.1038/nature01241
- 874 Lawo, S., Hasegan, M., Gupta, G. D., & Pelletier, L. (2012). Subdiffraction imaging of  
875 centrosomes reveals higher-order organizational features of pericentriolar material.  
876 *Nature Cell Biology*, *14*(11), 1148-1158. doi:10.1038/ncb2591
- 877 Lécuyer, E., Yoshida, H., Parthasarathy, N., Alm, C., Babak, T., Cerovina, T., . . . Krause, H. M.  
878 (2007). Global Analysis of mRNA Localization Reveals a Prominent Role in Organizing  
879 Cellular Architecture and Function. *Cell*, *131*(1), 174-187. doi:10.1016/j.cell.2007.08.003
- 880 Lerit, D. A., Jordan, H. A., Poulton, J. S., Fagerstrom, C. J., Galletta, B. J., Peifer, M., & Rusan,  
881 N. M. (2015). Interphase centrosome organization by the PLP-Cnn scaffold is required  
882 for centrosome function. *The Journal of Cell Biology*, *210*(1), 79-97.  
883 doi:10.1083/jcb.201503117
- 884 Lerit, D. A., & Rusan, N. M. (2013). PLP inhibits the activity of interphase centrosomes to  
885 ensure their proper segregation in stem cells. *The Journal of Cell Biology*, *202*(7), 1013-  
886 1022. doi:10.1083/jcb.201303141
- 887 Ling, S. C., Fahrner, P. S., Greenough, W. T., & Gelfand, V. I. (2004). Transport of Drosophila  
888 fragile X mental retardation protein-containing ribonucleoprotein granules by kinesin-1  
889 and cytoplasmic dynein. *Proc Natl Acad Sci U S A*, *101*(50), 17428-17433.  
890 doi:10.1073/pnas.0408114101
- 891 Little, S. C., Sinsimer, K. S., Lee, J. J., Wieschaus, E. F., & Gavis, E. R. (2015). Independent and  
892 coordinate trafficking of single Drosophila germ plasm mRNAs. *17*(5), 558-568.  
893 doi:doi/10.1038/ncb3143
- 894 Luo, Y., Shan, G., Guo, W., Smrt, R. D., Johnson, E. B., Li, X., . . . Zhao, X. (2010). Fragile x  
895 mental retardation protein regulates proliferation and differentiation of adult neural  
896 stem/progenitor cells. *PLOS Genetics*, *6*(4), e1000898.  
897 doi:10.1371/journal.pgen.1000898
- 898 Macdonald, P. M., & Struhl, G. (1988). cis-acting sequences responsible for anterior localization  
899 of bicoid mRNA in Drosophila embryos. *Nature*, *336*(6199), 595-598.  
900 doi:10.1038/336595a0
- 901 Magescas, J., Zonka, J. C., & Feldman, J. L. (2019). A two-step mechanism for the inactivation  
902 of microtubule organizing center function at the centrosome. *eLife*, *8*, 851.  
903 doi:10.7554/eLife.47867
- 904 Marshall, W. F., & Rosenbaum, J. L. (2000). Are there nucleic acids in the centrosome? *Current*  
905 *topics in developmental biology*, *49*, 187-205. doi:10.1016/s0070-2153(99)49009-x
- 906 Martinez-Campos, M., Basto, R., Baker, J., Kernan, M., & Raff, J. W. (2004). The Drosophila  
907 pericentrin-like protein is essential for cilia/flagella function, but appears to be  
908 dispensable for mitosis. *The Journal of Cell Biology*, *165*(5), 673-683.  
909 doi:10.1083/jcb.200402130

- 910 Megraw, T. L., Kilaru, S., Turner, F. R., & Kaufman, T. C. (2002). The centrosome is a dynamic  
911 structure that ejects PCM flares. *Journal of Cell Science*. doi:10.1242/jcs.00134
- 912 Megraw, T. L., Li, K., Kao, L. R., & Kaufman, T. C. (1999). The centrosomin protein is required  
913 for centrosome assembly and function during cleavage in *Drosophila*. *Development*  
914 (*Cambridge, England*), *126*(13), 2829-2839. doi:E26478EA-F903-4DD8-81FC-  
915 D634FF528F8A
- 916 Mennella, V., Keszthelyi, B., McDonald, K. L., Chhun, B., Kan, F., Rogers, G. C., . . . Agard, D.  
917 A. (2012). Subdiffraction-resolution fluorescence microscopy reveals a domain of the  
918 centrosome critical for pericentriolar material organization. *Nature Cell Biology*, *14*(11),  
919 1159-1168. doi:10.1038/ncb2597
- 920 Mittasch, M., Tran, V. M., Rios, M. U., Fritsch, A. W., Enos, S. J., Ferreira Gomes, B., . . .  
921 Woodruff, J. B. (2020). Regulated changes in material properties underlie centrosome  
922 disassembly during mitotic exit. *The Journal of Cell Biology*, *219*(4), 647.  
923 doi:10.1083/jcb.201912036
- 924 Monzo, K., Papoulas, O., Cantin, G. T., Wang, Y., Yates, J. R., & Sisson, J. C. (2006). Fragile X  
925 mental retardation protein controls trailer hitch expression and cleavage furrow formation  
926 in *Drosophila* embryos. *Proceedings of the National Academy of Sciences*, *103*(48),  
927 18160-18165. doi:10.1073/pnas.0606508103
- 928 Mueller, F., Senecal, A., Tantale, K., Marie-Nelly, H., Ly, N., Collin, O., . . . Zimmer, C. (2013).  
929 FISH-quant: automatic counting of transcripts in 3D FISH images. *Nature Publishing*  
930 *Group*, *10*(4), 277-278. doi:10.1038/nmeth.2406
- 931 Nigg, E. A., & Raff, J. W. (2009). Centrioles, Centrosomes, and Cilia in Health and Disease.  
932 *Cell*, *139*(4), 663-678. doi:10.1016/j.cell.2009.10.036
- 933 Palazzo, R. E., Vogel, J. M., Schnackenberg, B. J., Hull, D. R., & Wu, X. (1999). Centrosome  
934 maturation. *Current topics in developmental biology*. doi:10.1016/s0070-2153(99)49021-  
935 0
- 936 Papoulas, O., Monzo, K. F., Cantin, G. T., Ruse, C., Yates, J. R., Ryu, Y. H., & Sisson, J. C.  
937 (2010). dFMRP and Caprin, translational regulators of synaptic plasticity, control the cell  
938 cycle at the *Drosophila* mid-blastula transition. *Development (Cambridge, England)*,  
939 *137*(24), 4201-4209. doi:10.1242/dev.055046
- 940 Paz, I., Kosti, I., Ares, M., Cline, M., & Mandel-Gutfreund, Y. (2014). RBPmap: a web server  
941 for mapping binding sites of RNA-binding proteins. *Nucleic Acids Research*, *42*(Web  
942 Server issue), W361-367. doi:10.1093/nar/gku406
- 943 Pilaz, L.-J., Lennox, A. L., Rouanet, J. P., & Silver, D. L. (2016). Dynamic mRNA Transport  
944 and Local Translation in Radial Glial Progenitors of the Developing Brain. *Current*  
945 *biology : CB*, *26*(24), 3383-3392. doi:10.1016/j.cub.2016.10.040
- 946 Raff, J. W., Whitfield, W. G., & Glover, D. M. (1990). Two distinct mechanisms localise cyclin  
947 B transcripts in syncytial *Drosophila* embryos. *Development (Cambridge, England)*,  
948 *110*(4), 1249-1261. doi:uuid/4D66B8F1-B1A5-4338-A695-988574F8249F
- 949 Raj, A., van den Bogaard, P., Rifkin, S. A., van Oudenaarden, A., & Tyagi, S. (2008). Imaging  
950 individual mRNA molecules using multiple singly labeled probes. *Nature Methods*,  
951 *5*(10), 877-879. doi:10.1038/nmeth.1253
- 952 Richens, J. H., Barros, T. P., Lucas, E. P., Peel, N., Pinto, D. M. S., Wainman, A., & Raff, J. W.  
953 (2015). The *Drosophila* Pericentrin-like-protein (PLP) cooperates with Cnn to maintain  
954 the integrity of the outer PCM. *Biology Open*, *4*(8), 1052-1061. doi:10.1242/bio.012914

- 955 Ryder, P. V., & Lerit, D. A. (2018). RNA localization regulates diverse and dynamic cellular  
956 processes. *Traffic (Copenhagen, Denmark)*, *19*(7), 496-502. doi:10.1111/tra.12571
- 957 Santoro, M. R., Bray, S. M., & Warren, S. T. (2012). Molecular mechanisms of fragile X  
958 syndrome: a twenty-year perspective. *Annual review of pathology*, *7*(1), 219-245.  
959 doi:10.1146/annurev-pathol-011811-132457
- 960 Schindelin, J., Arganda-Carreras, I., Frise, E., Kaynig, V., Longair, M., Pietzsch, T., . . .  
961 Cardona, A. (2012). Fiji: an open-source platform for biological-image analysis. *Nature*  
962 *Methods*, *9*(7), 676-682. doi:10.1038/nmeth.2019
- 963 Sepulveda, G., Antkowiak, M., Brust-Mascher, I., Mahe, K., Ou, T., Castro, N. M., . . . Jao, L.-E.  
964 (2018). Co-translational protein targeting facilitates centrosomal recruitment of PCNT  
965 during centrosome maturation in vertebrates. *eLife*, *7*, 711. doi:10.7554/eLife.34959
- 966 Singh, G., Pratt, G., Yeo, G. W., & Moore, M. J. (2015). The Clothes Make the mRNA: Past and  
967 Present Trends in mRNP Fashion. *Annual Review of Biochemistry*, *84*(1), 325-354.  
968 doi:10.1146/annurev-biochem-080111-092106
- 969 Söderberg, O., Gullberg, M., Jarvius, M., Ridderstråle, K., Leuchowius, K.-J., Jarvius, J., . . .  
970 Landegren, U. (2006). Direct observation of individual endogenous protein complexes in  
971 situ by proximity ligation. *Nature Methods*, *3*(12), 995-1000. doi:10.1038/nmeth947
- 972 Sudhakaran, I. P., Hillebrand, J., Dervan, A., Das, S., Holohan, E. E., Hulsmeier, J., . . .  
973 Ramaswami, M. (2014). FMRP and Ataxin-2 function together in long-term olfactory  
974 habituation and neuronal translational control. *Proc Natl Acad Sci U S A*, *111*(1), E99-  
975 E108. doi:10.1073/pnas.1309543111
- 976 Sullivan, W., Fogarty, P., & Theurkauf, W. (1993). Mutations affecting the cytoskeletal  
977 organization of syncytial *Drosophila* embryos. *Development (Cambridge, England)*,  
978 *118*(4), 1245-1254. doi:586BBE41-951D-488E-B11D-8145EB42AEF3
- 979 Sunkel, C. E., & Glover, D. M. (1988). polo, a mitotic mutant of *Drosophila* displaying abnormal  
980 spindle poles. *Journal of Cell Science*, *89 (Pt 1)*, 25-38. doi:9D245140-0808-4682-  
981 A79B-2D51ACE64E5A
- 982 van der Walt, S., Colbert, S. C., & Varoquaux, G. (2011). The NumPy Array: A Structure for  
983 Efficient Numerical Computation. *Computing in Science & Engineering*, *13*(2), 22-30.  
984 doi:10.1109/MCSE.2011.37
- 985 van der Walt, S., Schönberger, J. L., Nunez-Iglesias, J., Boulogne, F., Warner, J. D., Yager, N., .  
986 . . Yu, T. (2014). scikit-image: image processing in Python. *PeerJ*, *2*(2), e453-418.  
987 doi:10.7717/peerj.453
- 988 Van Treeck, B., & Parker, R. (2018). Emerging Roles for Intermolecular RNA-RNA Interactions  
989 in RNP Assemblies. *Cell*, *174*(4), 791-802. doi:10.1016/j.cell.2018.07.023
- 990 Vardy, L., & Orr-Weaver, T. L. (2007). The *Drosophila* PNG Kinase Complex Regulates the  
991 Translation of Cyclin B. *Developmental Cell*, *12*(1), 157-166.  
992 doi:10.1016/j.devcel.2006.10.017
- 993 Vastenhouw, N. L., Cao, W. X., & Lipshitz, H. D. (2019). The maternal-to-zygotic transition  
994 revisited. *Development (Cambridge, England)*, *146*(11), dev161471.  
995 doi:10.1242/dev.161471
- 996 Vertii, A., Hehnl, H., & Doxsey, S. (2016). The Centrosome, a Multitalented Renaissance  
997 Organelle. *Cold Spring Harbor Perspectives in Biology*, *8*(12), a025049-025013.  
998 doi:10.1101/cshperspect.a025049

- 999 Waskom, M., Botvinnik, O., O'Kane, D., Hobson, P., Ostblom, J., Lukauskas, S., . . . Qalieh, A.  
1000 (2018). *mwaskom/seaborn: v0.9.0 (July 2018)*. Retrieved from  
1001 <https://doi.org/10.5281/zenodo.1313201>
- 1002 Woodruff, J. B., Gomes, B. F., Widlund, P. O., Mahamid, J., Honigmann, A., & Hyman, A. A.  
1003 (2017). The Centrosome Is a Selective Condensate that Nucleates Microtubules by  
1004 Concentrating Tubulin. *Cell*, *169*(6), 1066-1071.e1010. doi:10.1016/j.cell.2017.05.028
- 1005 Woodruff, J. B., Wueseke, O., Viscardi, V., Mahamid, J., Ochoa, S. D., Bunkenborg, J., . . .  
1006 Hyman, A. A. (2015). Regulated assembly of a supramolecular centrosome scaffold in  
1007 vitro. *Science*, *348*(6236), 808-812. doi:10.1126/science.aaa3923
- 1008 Xu, H., Sepúlveda, L. A., Figard, L., Sokac, A. M., & Golding, I. (2015). Combining protein and  
1009 mRNA quantification to decipher transcriptional regulation. *Nature Methods*, *12*(8), 739-  
1010 742. doi:10.1038/nmeth.3446
- 1011 Zhang, Y. Q., Bailey, A. M., Matthies, H. J., Renden, R. B., Smith, M. A., Speese, S. D., . . .  
1012 Broadie, K. (2001). *Drosophila* fragile X-related gene regulates the MAP1B homolog  
1013 Futsch to control synaptic structure and function. *Cell*, *107*(5), 591-603.  
1014 doi:10.1016/s0092-8674(01)00589-x
- 1015 Zwicker, D., Decker, M., Jaensch, S., Hyman, A. A., & Jülicher, F. (2014). Centrosomes are  
1016 autocatalytic droplets of pericentriolar material organized by centrioles. *Proceedings of*  
1017 *the National Academy of Sciences of the United States of America*, *111*(26), E2636-2645.  
1018 doi:10.1073/pnas.1404855111  
1019

1020 **FIGURE LEGENDS**

1021 **Figure 1. Quantitative localization of mRNA to centrosomes.** Maximum intensity projections  
1022 showing smFISH for the indicated RNAs (magenta) in interphase and metaphase NC 13  
1023 embryos expressing the centrosome marker GFP-Cnn (green). Nuclei are labeled with DAPI  
1024 (blue). Boxed regions are enlarged in insets. Open arrowheads mark enrichments of *cyc B* and  
1025 *p/p* mRNAs near the PCM. Quantification of the cumulative percentage of RNA located within 1  
1026  $\mu\text{m}$  from the centrosome surface is shown to the right and plotted as mean (dark line)  $\pm$  S.D.  
1027 (shading). (A–C) *gapdh*, (D–F) *cyc B*, and *p/p* (G–I). See Fig. 1 Supplemental Table 2 for details  
1028 regarding the number of embryos, centrosomes, and RNA objects quantified per condition.  
1029 Scale bars: 5  $\mu\text{m}$  and 1  $\mu\text{m}$  (insets).

1030

1031 **Figure 1 Supplement 1. Schematic of image analysis for quantification of localized RNA.**

1032 (A) Workflow used to quantify RNA distributions relative to centrosomes. (B) Cartoon shows the  
1033 total RNA (magenta) within a syncytial *Drosophila* embryo pseudocell (dashed gray line) and  
1034 RNA residing within 1  $\mu\text{m}$  from a centrosome (green) surface (solid black lines). (C) The  
1035 distances from the surfaces of each RNA object to the nearest centrosome were calculated  
1036 (dashed lines). RNA objects that overlapped with centrosomes (open arrowheads) localized 0  
1037  $\mu\text{m}$  from the centrosome. (D) Mock plot showing the cumulative distribution of RNA relative to  
1038 distance from the centrosome, where 0  $\mu\text{m}$  indicates RNA signals overlapping with centrosome  
1039 signals. We define RNAs residing within 1  $\mu\text{m}$  from the centrosome as centrosome-enriched (or  
1040 pericentrosomal).

1041

1042 **Figure 1 Supplement 2. Cumulative distributions of centrosome-associated RNAs across**  
1043 **the total cell volume.** Graphs show the cumulative percentage of RNA as a function of  
1044 distance from the centrosome surface as measured in NC 13 interphase or metaphase

1045 embryos. Data are plotted as mean  $\pm$  S.D. (A) *gapdh*, (B) *cyc B*, (C) *plp*, (D) *pins*, and (E) *sov*.

1046 See Fig. 1 Supplemental Table 2 for details.

1047

1048 **Figure 1 Supplement 3. Cumulative distributions of granule-localized RNAs.** Graphs show

1049 the cumulative percentage of RNA contained in granules ( $\geq 4$  overlapping RNA objects) within 1

1050  $\mu\text{m}$  from a centrosome as measured in NC 13 interphase or metaphase embryos. Data are

1051 plotted as mean  $\pm$  S.D. (A) *cyc B*, (B) *plp*, (C) *pins*, and (D) *sov*. See Fig. 1 Supplemental Table

1052 2 for details.

1053

1054 **Figure 1 Supplement 4. Localization of *pins* and *sov* mRNAs.** Maximum intensity projections

1055 showing smFISH for *pins* or *sov* mRNAs (magenta) in interphase and metaphase NC 13

1056 embryos expressing GFP-Cnn (green). Boxed regions are enlarged in the insets. Open

1057 arrowheads denote association of *sov* mRNA with centrosome flares. Quantification of the

1058 cumulative percentage of RNA located within 1  $\mu\text{m}$  of the centrosome surface is shown to the

1059 right and plotted as mean  $\pm$  S.D. (A–C) *pins* and (D–F) *sov*. See Fig. 1 Supplemental Table 2 for

1060 details. Scale bars: 5  $\mu\text{m}$  and 1  $\mu\text{m}$  (insets).

1061

1062 **Figure 2. *cen* mRNA localizes to centrosomes in micron-scale granules that are cell cycle**

1063 **and developmentally regulated.** Maximum intensity projections showing *cen* smFISH

1064 (magenta) in interphase and metaphase embryos expressing GFP-Cnn (green). Boxed regions

1065 are enlarged below (zoom). (A–D) Distribution of *cen* mRNA during NC 13. (A) During

1066 interphase, *cen* resides within a large granule asymmetrically localized to a single centrosome

1067 (arrow). (B) During metaphase, the *cen* granule is displaced from the centrosome (arrowheads).

1068 Quantifications show (C) the cumulative percentage of *cen* located within 1  $\mu\text{m}$  from the

1069 centrosome surface and (D) the cumulative percentage of *cen* residing within RNA granules ( $\geq$



1070 4 overlapping RNAs) within 1  $\mu\text{m}$  from the centrosome surface. During interphase, the majority  
1071 of *cen* resides at the centrosome surface (0  $\mu\text{m}$ ) within RNA granules. (E–H) Distribution of *cen*  
1072 mRNA during NC 10. (E) Interphase embryos show *cen* mRNA localized symmetrically and  
1073 primarily as single molecules near centrosomes. (F) *cen* often resides within RNA granules in  
1074 mitotic embryos. (G) Plot shows the cumulative distribution of *cen* located within 1  $\mu\text{m}$  from the  
1075 centrosome surface. (H) Plot shows the cumulative percentage of *cen* within RNA granules.  
1076 Note the similarity to the cumulative distribution plot in (G), indicating that the majority of *cen*  
1077 located within 1  $\mu\text{m}$  of the centrosome is contained within granules. See Fig. 1 Supplemental  
1078 Table 2 for details. Data are plotted as mean  $\pm$  S.D. Scale bars: 10  $\mu\text{m}$  and 2.5  $\mu\text{m}$  (insets).

1079

1080 **Figure 2 Supplement 1. The *cen* granule preferentially localizes to the mother**

1081 **centrosome.** (A and B) Maximum intensity projections showing *cen* smFISH (magenta) in NC  
1082 13 embryos relative to Cnn (green). (A) *cen* smFISH signals are not detected within null *cen*  
1083 mutant embryos. Centrosomes are labeled with anti-Cnn antibodies. (B) An embryo expressing  
1084 GFP-Cnn where the mother (M) and daughter (D) centrosomes are labeled. Arrows mark a *cen*  
1085 granule localizing to the mother centrosome. (C) Quantification shows the frequency distribution  
1086 of *cen* granule localization to the mother or daughter centrosome. N=107 centrosome pairs  
1087 were measured from n=5 embryos. Scale bars: 10  $\mu\text{m}$  (A) and (B) 2.5  $\mu\text{m}$ .

1088

1089 **Figure 2 Supplement 2. Cumulative distributions of *cen* RNA across the total cell volume.**

1090 Graphs show the cumulative distributions of *cen* RNA (blue lines) relative to *gapdh* (orange  
1091 lines) in interphase and metaphase embryos. (A and B) During interphase, NC 13 embryos  
1092 show a majority of *cen* mRNA resides at centrosomes as a result of the accumulation of *cen*  
1093 within pericentrosomal granules. (C and D) NC 10 embryos show more modest centrosomal  
1094 enrichments of *cen* mRNA. Data are plotted as mean  $\pm$  S.D. See Fig. 1 Supplemental Table 2

1095 for details.

1096

1097 **Figure 3. Composition of the *cen* granule.** (A) Maximum intensity projection of a NC 13  
1098 embryo expressing GFP-Cnn (magenta) showing colocalization of *cen* mRNA (green) and  
1099 protein (red). Boxed region is enlarged to the right (zoom); arrows highlight a *cen* granule. (B)  
1100 Chart displays the Pearson's correlation coefficient for colocalization between *cen* smFISH and  
1101 anti-Cen signals (a.u., arbitrary units). Each dot represents a single measurement from N=10  
1102 NC 13 embryos; mean  $\pm$  S.D. is shown (red). (C–E) Maximum intensity projections of NC 14  
1103 embryos expressing GFP-Cnn (green) with PLA signals (magenta) from the specified  
1104 antibodies. (C) No primary antibodies, (D) control rabbit (rab) anti-Cnn and mouse (ms) anti-  
1105 GFP antibodies, and (E) rabbit anti-Cen and mouse anti-FMRP antibodies. (F) Each dot shows  
1106 the number of PLA signals counted within a single embryo within the field-of-view,  $\sim 4,430 \mu\text{m}^2$ ,  
1107 from N=21 embryos using no primary antibodies, N=19 embryos using control anti-rabbit and  
1108 anti-mouse antibodies, and N=19 embryos using rabbit anti-Cen and mouse anti-FMRP  
1109 antibodies; n.s. not significant; \*\*\*\*  $P \leq 0.0001$  by the Kruskal-Wallis test followed by Dunn's  
1110 test. (G) Immunoblot from anti-Cen immunoprecipitation using 1-3 hr embryonic extracts. Lane  
1111 1, 10% input; lane 2, no antibody (- ab)/empty beads; lane 3, control rabbit anti-GFP antibody;  
1112 and lane 4, rabbit anti-Cen antibody. Cen pulls down itself (top) and FMRP (middle and bottom).  
1113 The bottom blot shows an increased exposure to highlight the FMRP band; note, lane 1 was  
1114 cropped due to over-saturated signal. (H) RNA-immunoprecipitation where RT-PCR reactions  
1115 were run in the presence (+) or absence (-) of reverse transcriptase (RT). Lanes 1 and 2, 10%  
1116 input; lanes 3 and 4, no antibody (- ab)/empty beads; lanes 5 and 6, control rabbit anti-GFP  
1117 antibody; and lanes 7 and 8, rabbit anti-Cen antibody. The middle image shows an increased  
1118 exposure to highlight the *cen* band; note, lanes 1 and 2 were cropped due to over-saturated  
1119 signal. (I) Immunoblots from FMRP-GFP immunoprecipitation using 0-2 hr WT or FMRP-GFP

1120 embryonic extracts and GFP-Trap beads probed with rabbit anti-GFP (top) and mouse anti- $\beta$ -  
1121 Tub antibodies (bottom). GFP pulls out FMRP-GFP. Bracket denotes bands representing  
1122 nonspecific and/or degradation products. (J) RNA-immunoprecipitation from GFP-Trap beads  
1123 detects *cen* and the positive control, *fmr* (Ling, Fahrner, Greenough, & Gelfand, 2004). Scale  
1124 bars: 10  $\mu$ m and 1  $\mu$ m (insets).

1125

1126 **Figure 3 Supplement 1. *cen* granule formation requires the centrosome scaffold.** (A)

1127 Image shows immunofluorescence for Cnn (green) and *cen* smFISH (magenta) in an NC 12  
1128 *cnn<sup>B4</sup>* embryo. Boxed region is enlarged below. Note the absence of large pericentrosomal *cen*  
1129 granules. (B) Immunoblots show Cen protein content in 0-2 hour WT and *cnn<sup>B4</sup>* lysates. Actin is  
1130 used as a loading control. (B') Graph shows the normalized expression levels of Cen. Each dot  
1131 represents the levels of Cen normalized to the mean relative expression of the Actin load  
1132 control. n.s. not significant (P=0.672) by unpaired t-test. Scale bars: 10  $\mu$ m and 1  $\mu$ m (insets).

1133

1134 **Figure 3 Supplement 2. Candidate-based screen for centrosomal RNA-binding proteins.**

1135 Images show interphase NC 12 embryos stained with Cnn (magenta) and antibodies for the  
1136 indicated RNA-binding proteins (green): (A) Egl, (B) Orb2, (C) Me31B, (D) Pum, and (E) FMRP.  
1137 Arrowheads shows FMRP overlapping with Cnn. (F) Immunofluorescence for FMRP was  
1138 coupled with *cen* smFISH. Dashed circle marks FMRP puncta overlapping with *cen* RNA. Boxed  
1139 regions are enlarged below. Scale bars: 10  $\mu$ m and 2  $\mu$ m (insets).

1140

1141 **Figure 4. *Fmr1* regulates *cen* granule formation and size.** Images show maximum intensity

1142 projections of WT or *fmr1* mutant NC 13 embryos expressing  $\gamma$ Tub-GFP and labeled with *cen*  
1143 smFISH during (A and B) interphase or (C and D) mitosis. Boxed regions are enlarged to the  
1144 right (zoom). (A) *cen* mRNA is typically packaged into a pericentrosomal granule in interphase

1145 control embryos. (B) *cen* granules are larger and less organized within *fmr1* embryos. (C) A  
1146 control embryo showing *cen* granules displaced from mitotic centrosomes. (D) The distribution  
1147 of *cen* mRNA within mitotic *fmr1* embryos resembles controls. (E) Graph shows the cumulative  
1148 percentage of *cen* located within 1  $\mu\text{m}$  of the centrosome surface in WT (orange) vs. *fmr1*  
1149 mutant (blue) embryos. (F) Graph shows the cumulative percentage of *cen* found in RNA  
1150 granules located within 1  $\mu\text{m}$  of the centrosome surface. Data are plotted as mean  $\pm$  S.D. See  
1151 Fig. 4 Supplemental Table 1 for the number of embryos, centrosomes, and RNA objects  
1152 quantified. Scale bars: 10  $\mu\text{m}$  and 2.5  $\mu\text{m}$  (insets).

1153  
1154 **Figure 4. Supplement 1. FMRP instructs the timing of *cen* RNA granule formation.** Images  
1155 show maximum intensity projections of WT or *fmr1* mutant NC 10 embryos expressing  $\gamma\text{Tub}$ -  
1156 GFP and labeled with *cen* smFISH during (A and B) interphase or (C and D) mitosis. Boxed  
1157 regions are enlarged to the right (zoom). (A) In interphase control embryos, *cen* is largely  
1158 distributed as single molecules. (B) More *cen* granules are observed in interphase *fmr1*  
1159 embryos. (C) In controls, *cen* granules form during mitosis. (F) In *fmr1* mutants, more *cen* is  
1160 organized as granules. (E) Cumulative percentage of *cen* within 1  $\mu\text{m}$  of the centrosome surface  
1161 in WT (orange) or *fmr1* mutant (blue) embryos. (F) Cumulative percentage of *cen* within RNA  
1162 granules up to 1  $\mu\text{m}$  from the centrosome surface. Data are plotted as mean  $\pm$  S.D. Note the  
1163 similarity of the cumulative distribution plots in (E) and (F), indicating that the majority of the *cen*  
1164 transcripts are contained within granules in both genotypes. See Fig. 4 Supplemental Table 1  
1165 for details. Scale bars are 10  $\mu\text{m}$  and 2.5  $\mu\text{m}$  (insets).

1166  
1167 **Figure 4 Supplement 2. Cumulative distributions of *cen* RNA across the total cell volume**  
1168 **in *fmr1* mutants.** Graphs show the cumulative percentage of *cen* RNA as a function of distance  
1169 from a centrosome surface, as measured in WT (orange lines) and *fmr1* mutant (blue lines) (A

1170 and B) NC 10 and (C and D) NC 13 interphase or metaphase embryos. Data are plotted as  
1171 mean  $\pm$  S.D. See Fig. 4 Supplemental Table 1 for details.

1172

1173 **Figure 5. FMRP regulates *cen* to ensure error-free mitosis.** (A) Levels of *cen* RNA were  
1174 normalized to *RP49* as detected by qPCR from 0–1 hr embryonic lysates. (B) Immunoblots  
1175 show Cen protein content relative to the  $\beta$ -Tub loading control from 0-1 hour embryonic extracts  
1176 and are quantified in (B'). (C) Normalized levels of *cen* RNA from 1–3 hr embryos. (D)  
1177 Immunoblots show Cen protein content relative to the  $\beta$ -Tub loading control in 1-3 hour  
1178 embryonic extracts and are quantified in (D'). (E) Immunoblots show Cen protein content  
1179 relative to actin loading control in 1-3 hour embryonic lysates from the indicated genotypes and  
1180 are quantified in (E'). For (A–E'), data are normalized to the mean relative expression of the WT  
1181 controls from N=3 biological replicates. (F–I) Maximum intensity projections of mitotic NC 11  
1182 embryos from the indicated genotypes showing immunofluorescence for  $\alpha$ -Tub to label  
1183 microtubules (red), Cnn labels PCM (green), and Asterless (*Asl*) labels centrioles (magenta).  
1184 DAPI labels nuclei (blue). (F) WT embryos show normal, evenly spaced bipolar mitotic spindles.  
1185 (G) Many *cen* embryos show spindle defects, including reduced microtubule organization and  
1186 poorly condensed DNA (open arrowheads), as well as poorly separated centrosomes (closed  
1187 arrowheads). (H) Spindle defects were common in *fmr1* mutants, as evidenced by massive  
1188 nuclear fallout (dashed lines), as well as bent and disorganized spindles (arrows). (I)  
1189 Hemizyosity for *cen* in the context of a *fmr1* background resulted in partial rescue of spindle  
1190 defects and embryonic viability. n.s. not significant; \* $P < 0.05$ ; \*\*\*\*  $P < 0.0001$  by unpaired t-test.  
1191 Scale bars: 5  $\mu$ m.

1192

1193 **Figure 6. Ectopic localization of *cen* RNA disrupts nuclear divisions.** Images show  
1194 maximum intensity projections of *cen-bcd-3'UTR* embryos, which are progeny from females

1195 expressing the *pUASp-cen-bcd-3'UTR* transgene under the *maternal  $\alpha$ -Tub GAL4* driver in the  
1196 *cen* null background. (A and B) Low magnification images showing anterior localization of *cen*  
1197 smFISH signals (magenta) costained with DAPI (blue) and anti-Cen antibodies (green). (A) NC  
1198 4 embryo showing a gradient of *cen* RNA and protein focused at the anterior pole. (B) NC 14  
1199 embryo showing the disruption of nuclear spacing at the anterior pole. (C) Ectopic localization of  
1200 *cen* RNA to the anterior pole results in the formation of massive *cen* RNA granules (magenta)  
1201 decorated by numerous centrosomes (Cnn, green). Boxed region is enlarged below (zoom);  
1202 dashed circle highlights a nucleus and part of a *cen* RNP associated with supernumerary  
1203 centrosomes. Nuclear fallout is evident by holes in the nuclear monolayer. (D) NC 12 embryo  
1204 showing a mitotic spindle defect at ~50% egg-length; arrowhead marks a detached centrosome.  
1205 (E) NC 12 embryo showing extensive disruptions to microtubule organization ( $\alpha$ -Tub, green)  
1206 and centrosome positioning (Cnn, magenta) at the anterior pole. DAPI-labeled nuclei (blue) are  
1207 often enlarged or dysmorphic (dashed lines). Clusters of anucleated centrosomes indicate  
1208 nuclear fallout. Boxed regions show insets enlarged below (zoom). Scale bars: (A and B) 50  $\mu$ m;  
1209 (C–E) 10  $\mu$ m and 2  $\mu$ m (insets).

1210

1211 **Figure 6 Supplement 1. Cen protein expression in *cen-bcd-3'UTR* embryos.** (A)

1212 Immunoblots show Cen protein content relative to the actin loading control from 1-3 hour  
1213 embryonic extracts and are quantified in (A'). Levels of Cen were normalized to the mean WT  
1214 levels of actin from N=3 independent biological replicates, each with n=2 technical replicates run  
1215 on the same gel. (B) Maximum intensity projection of an early interphase NC 10 *cen-bcd-3'UTR*  
1216 embryo. Note the formation of large-scale *cen*-containing RNPs adjacent to centrosomes. \*  
1217 P<0.05 by unpaired t-test. Scale bars: 10  $\mu$ m and 2  $\mu$ m (insets).

1218

1219 **Figure 7. Model of FMRP-mediated *cen* mRNA localization and translational control at**

1220 **centrosomes.** Diagram illustrates *cen* mRNA (magenta) recruitment to interphase centrosomes  
1221 (green); nucleus is blue. A direct interaction between Cnn and Cen recruits Cen to the  
1222 centrosome (Kao & Megraw, 2009). Cen protein is sufficient to recruit *cen* mRNA, and local  
1223 translation of Cen creates a positive feedback loop, resulting in a concentrated, pericentrosomal  
1224 enrichment of *cen* (Bergalet et al., 2020). We show that *cen* mRNA and protein form an  
1225 immunoprecipitable complex, and they colocalize within micron-scale granules. We further show  
1226 that the localization of *cen* mRNA to centrosomes, its organization into granules, the stability of  
1227 *cen* mRNA, and its translation are all regulated by FMRP. Finally, our genetic epistasis work  
1228 demonstrates that *cen* is an important target of FMRP required for centrosome separation,  
1229 spindle morphogenesis, and error-free mitosis.

1230

1231 **Figure 1 Supplemental Table 1. Candidate centrosomal RNAs.** Genes documented to  
1232 localize to centrosomes or spindle poles in (Lécuyer et al., 2007). Listed are the cDNAs used to  
1233 generate traditional FISH probes in the Lécuyer screen (Column A) and the corresponding gene  
1234 identifier information (Columns B and C). Additional information is annotated at [http://fly-](http://fly-fish.cabr.utoronto.ca/)  
1235 [fish.cabr.utoronto.ca/](http://fly-fish.cabr.utoronto.ca/).

1236

1237 **Figure 1 Supplemental Table 2. Quantification of RNA localization to centrosomes.** For  
1238 each mRNA analyzed (Column A), we documented the number of embryos (Column B),  
1239 centrosomes (Column C), and RNA objects (Column D) quantified within NC 10 and 13  
1240 embryos in interphase versus metaphase. For each biological condition, we calculated the  
1241 mean (Column E) and standard deviation (Column F) for the percentage of RNA within 1  $\mu\text{m}$  of  
1242 the centrosome surface per image. We used these data to calculate the mean fold-enrichment  
1243 of mRNA relative to *gapdh* (Column G). We also calculated the mean (Column H) and standard  
1244 deviation (Column I) percentage of RNA contained in granules containing 4 or more transcripts  
1245 within 1  $\mu\text{m}$  of the centrosome surface.

1246

1247 **Figure 1 Supplemental Table 3. smFISH probe sequences.** 5' to 3' smFISH probe

1248 sequences for *cen*, *cyc B*, *pins*, *plp*, *sov*, and *gapdh* are provided.

1249

1250 **Figure 4 Supplemental Table 1. Quantification of *cen* localization to centrosomes in WT**

1251 **and *fmr1* embryos.** For each given genotype (Column A), developmental stage (Column B),

1252 and cell cycle stage (Column C), we documented the number of embryos (Column D),

1253 centrosomes (Column E), and RNA objects (Column F) quantified. For each biological condition,

1254 we calculated the mean (Column G) and standard deviation (Column H) for the percentage of

1255 RNA overlapping with the centrosome surface per image. We used these data to calculate the

1256 mean fold enrichment of mRNA relative to the WT control (Column I). We also calculated the

1257 mean (Column J) and standard deviation (Column K) percentage of RNA contained in granules

1258 containing 4 or more transcripts overlapping with the centrosome surface. We repeated these

1259 same calculations for the volume within 1  $\mu\text{m}$  of the centrosome surface (Columns M–Q).

1260

1261 **Table 1. *cen* overexpression increases embryonic lethality.** (A) Lethality rates in *fmr1*

1262 embryos and *fmr1* embryos that are hemizygous at the *cen* allele. (B) Lethality rates in *cen*-null

1263 embryos and embryos expressing the *cen-bcd-3'UTR* transgene in a *cen*-null background.



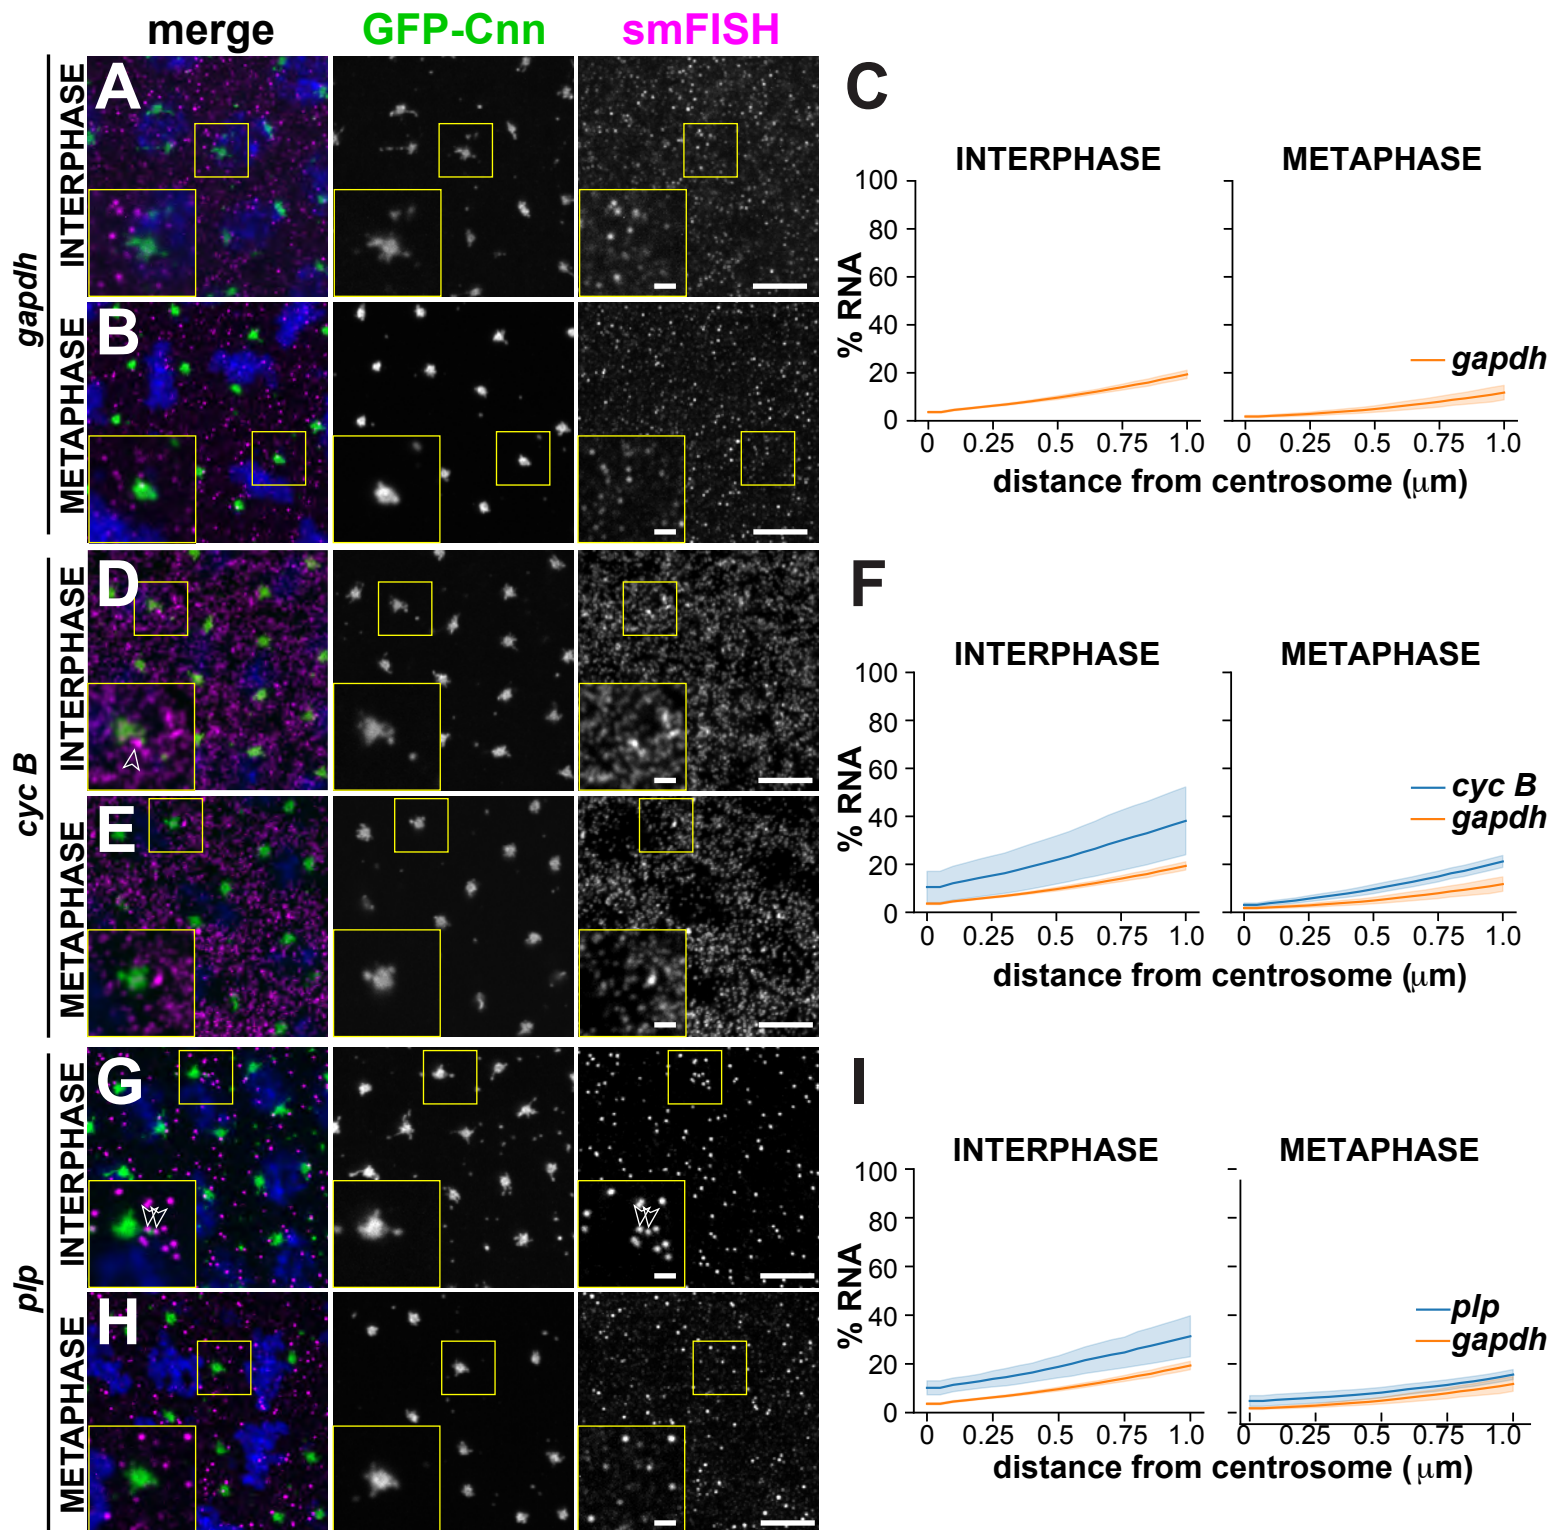

Figure 1. *cyc B* and *plp* mRNAs localize to centrosomes.

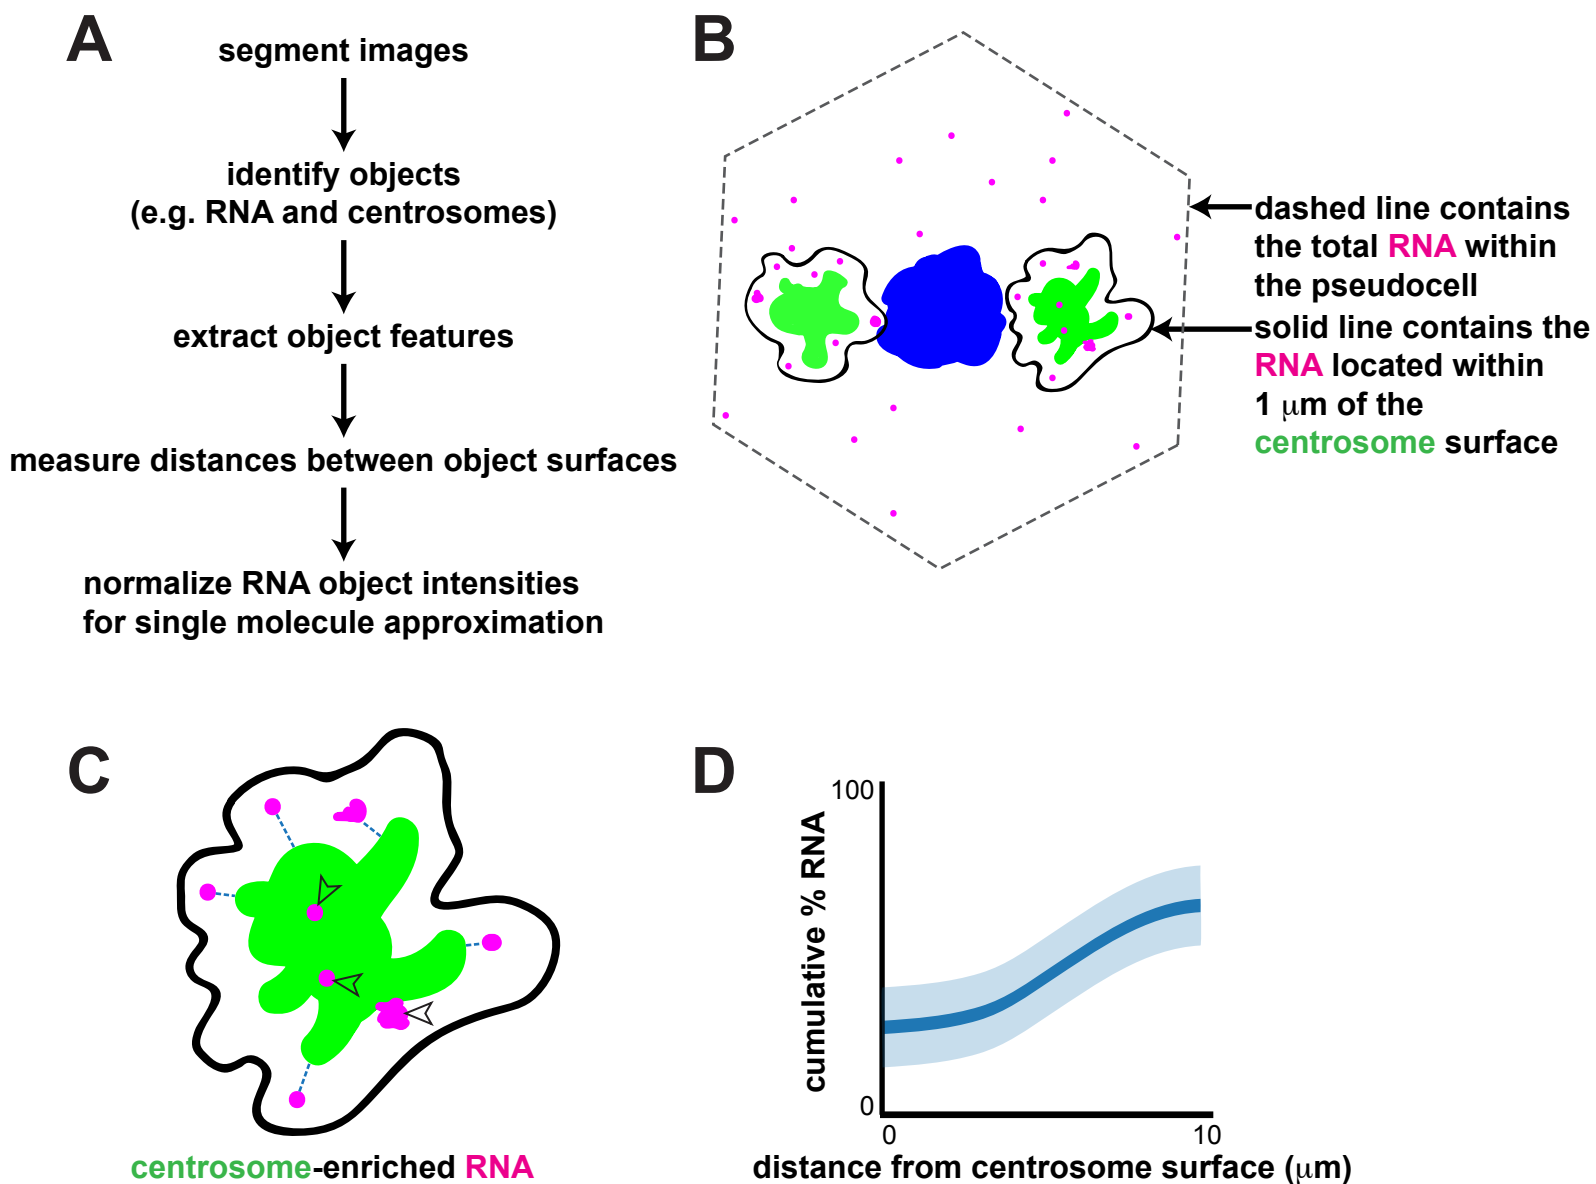

**Figure 1 Supplement 1. Schematic of image analysis for quantification of localized RNA.**

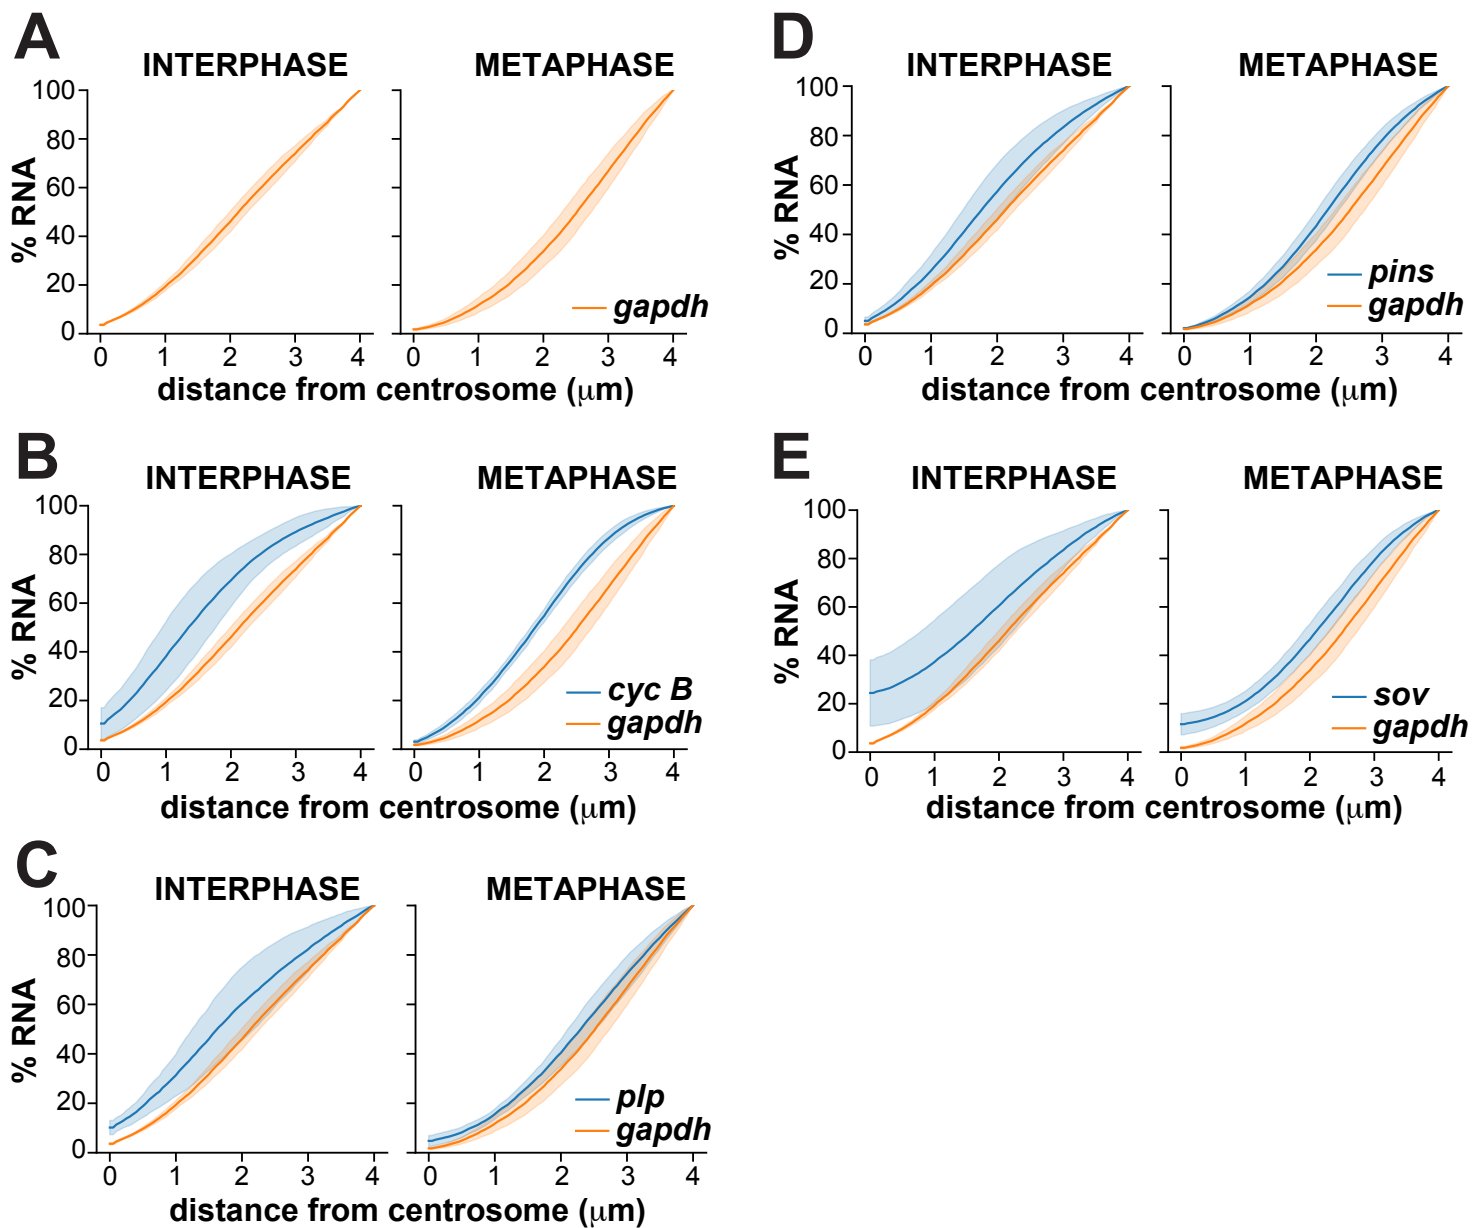

Figure 1 Supplement 2. Cumulative distributions of centrosome-associated RNAs across the total cell volume.

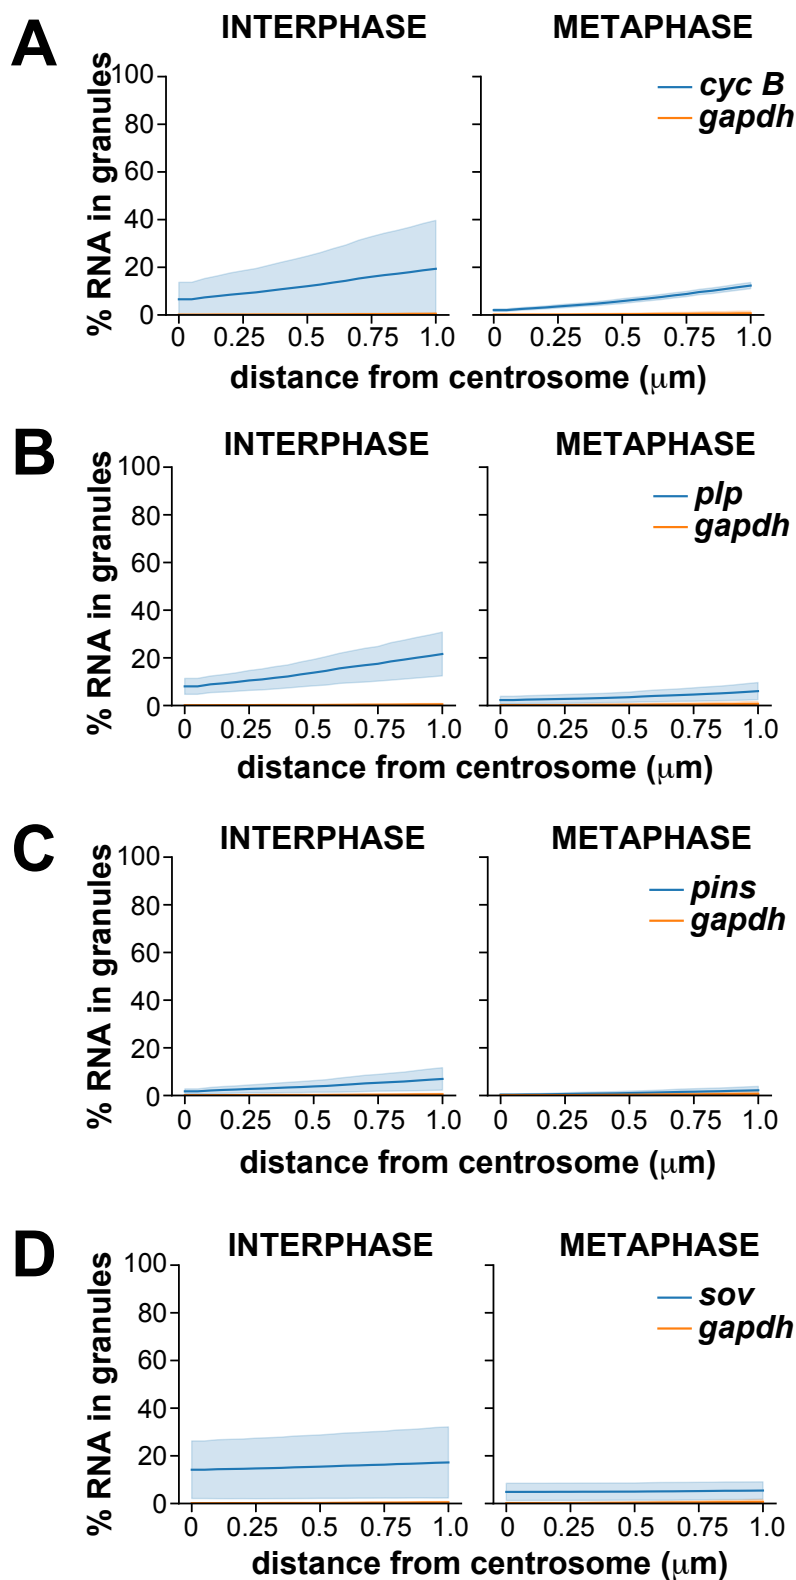

Figure 1 Supplement 3. Cumulative distributions of granule-localized RNAs.

merge GFP-Cnn smFISH

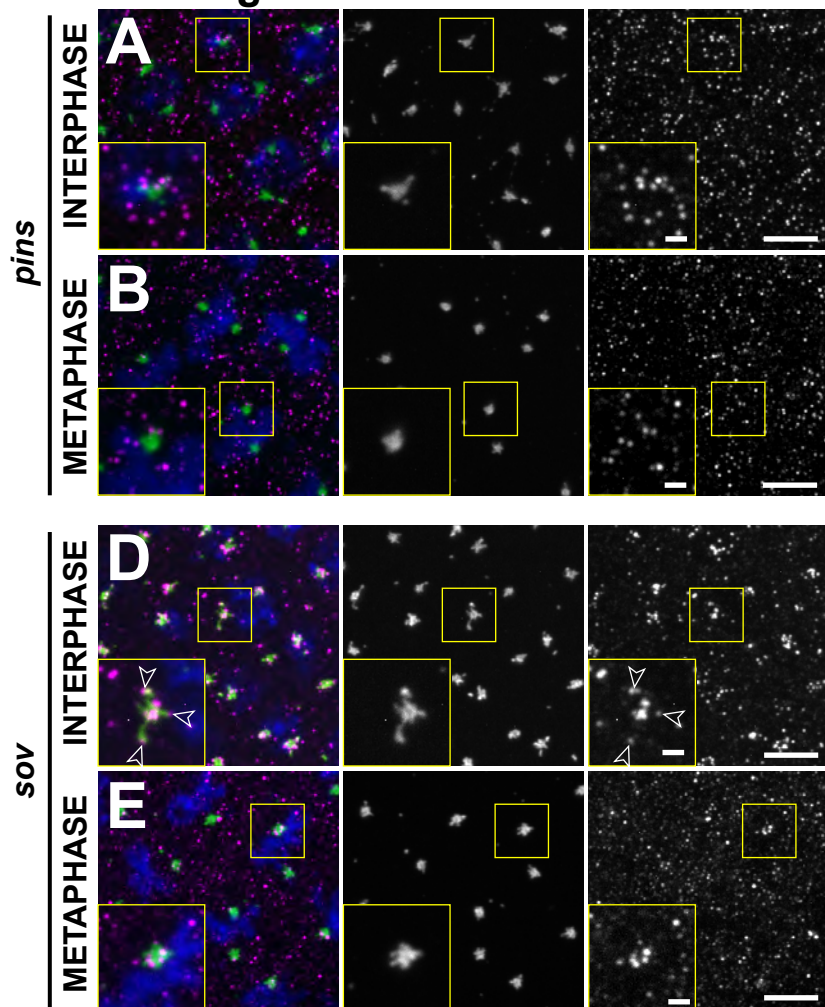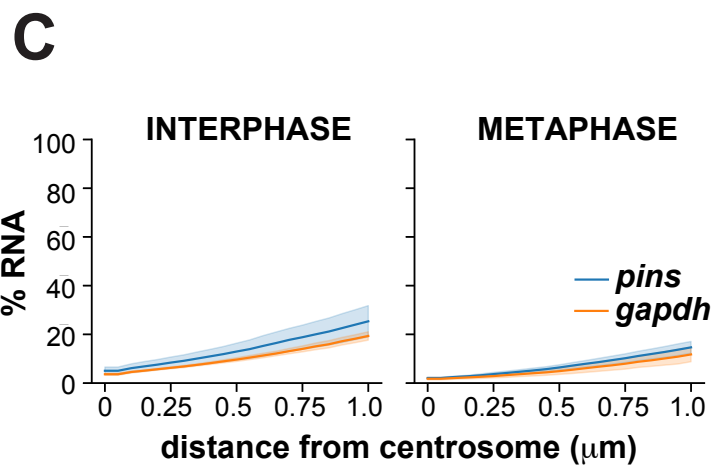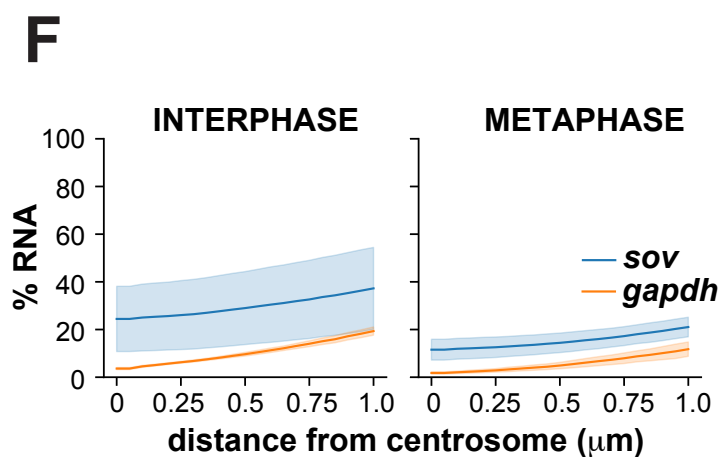

Figure 1 Supplement 4. Localization of *pins* and *sov* mRNAs.

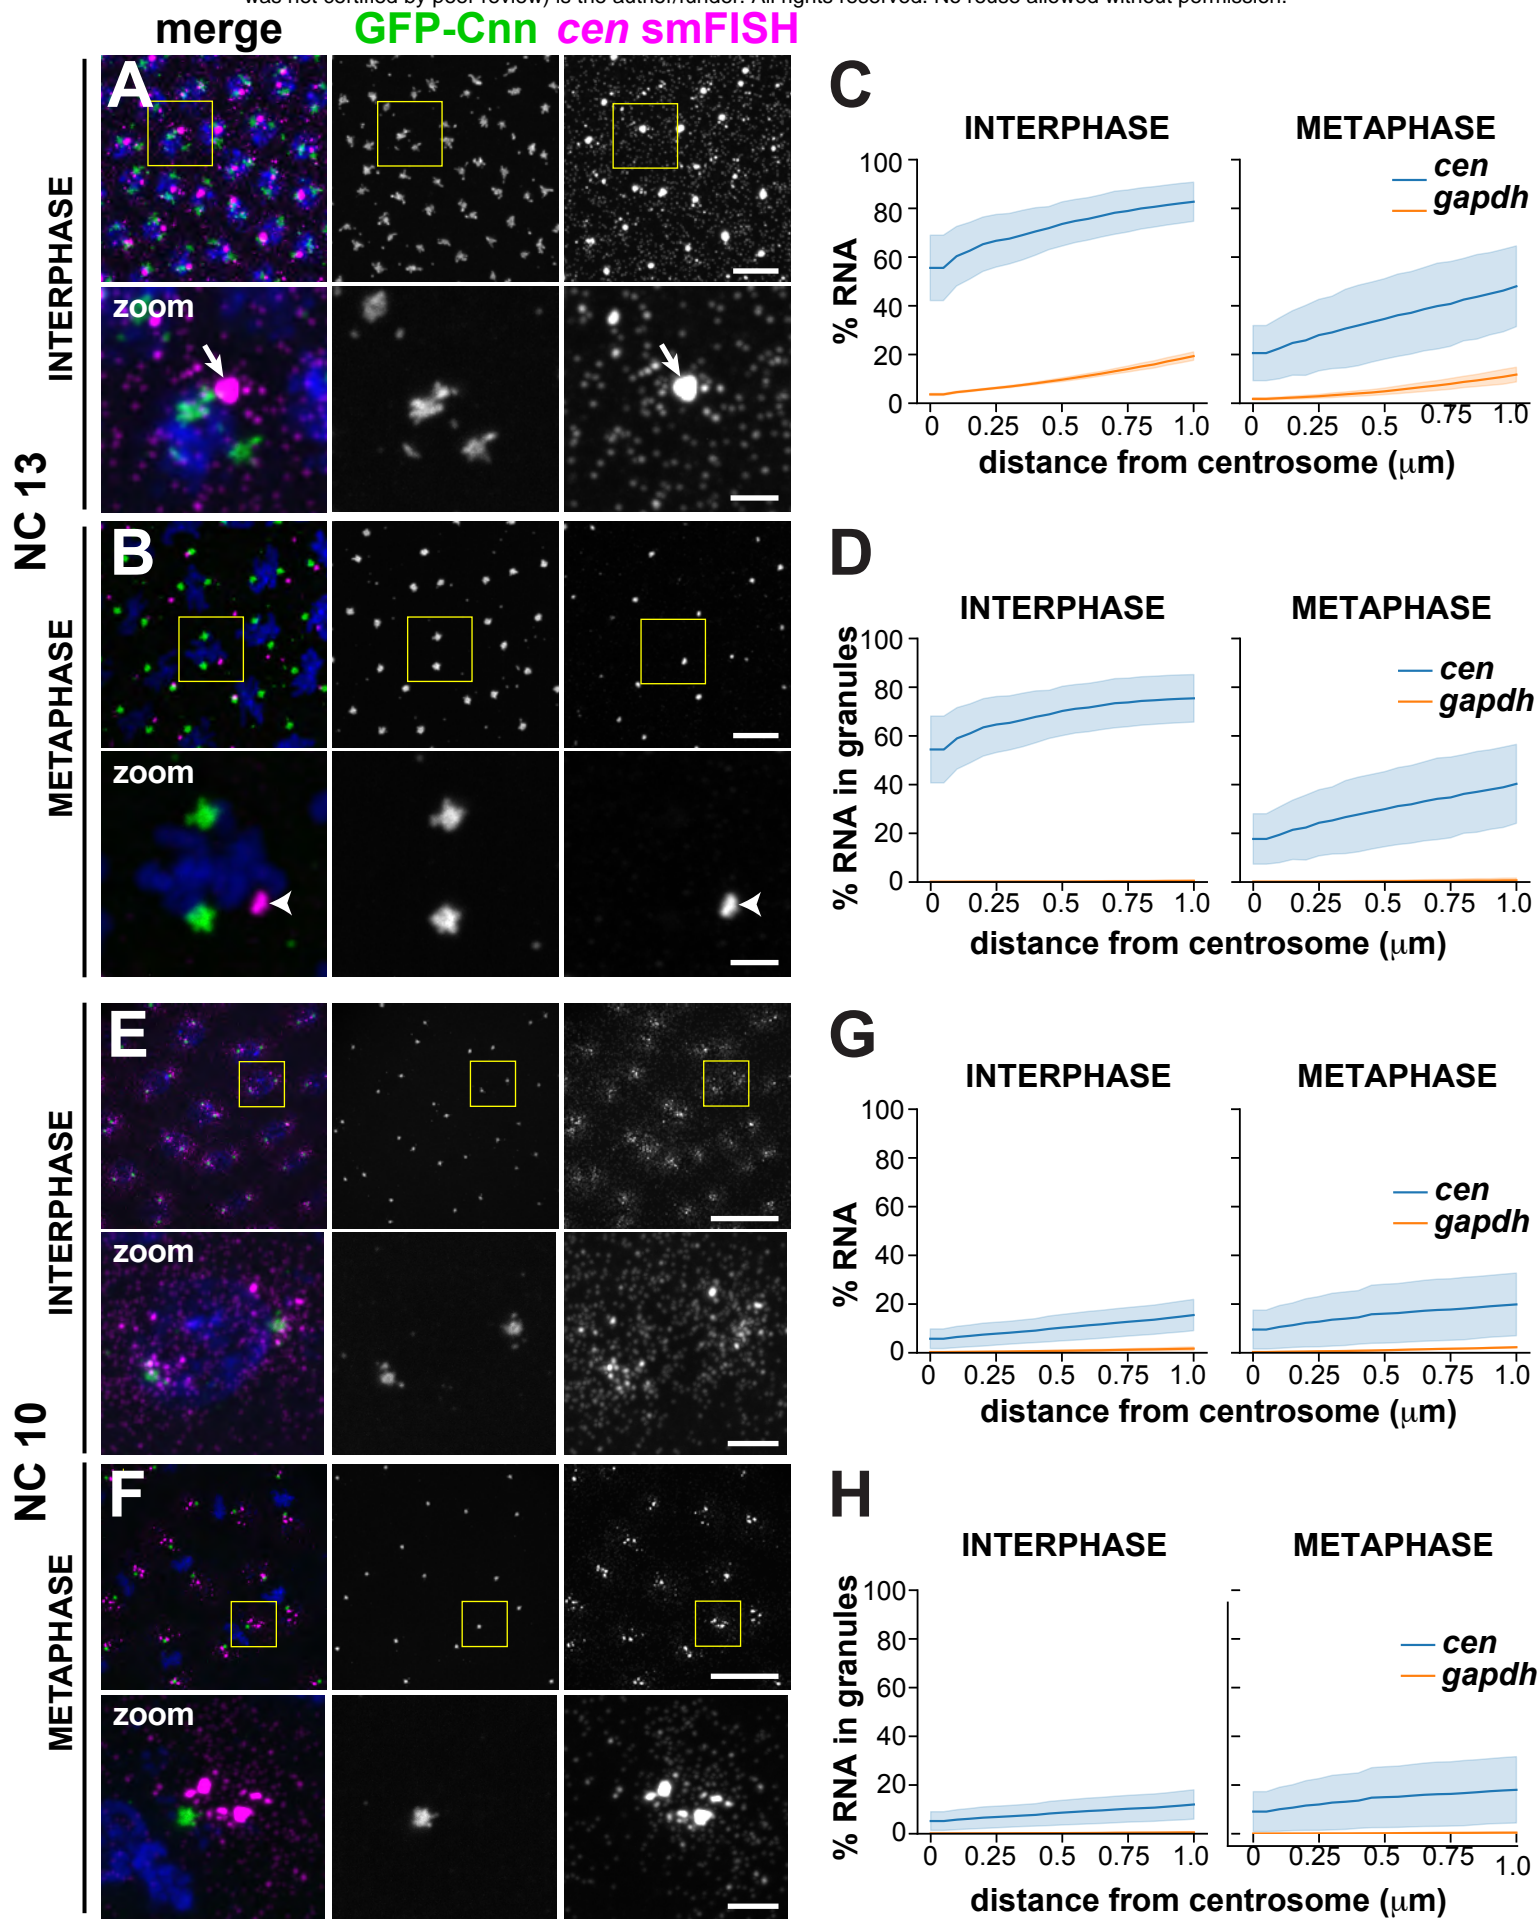

**Figure 2. *cen* mRNA localizes to centrosomes in micron-scale granules that are cell cycle and developmentally regulated**

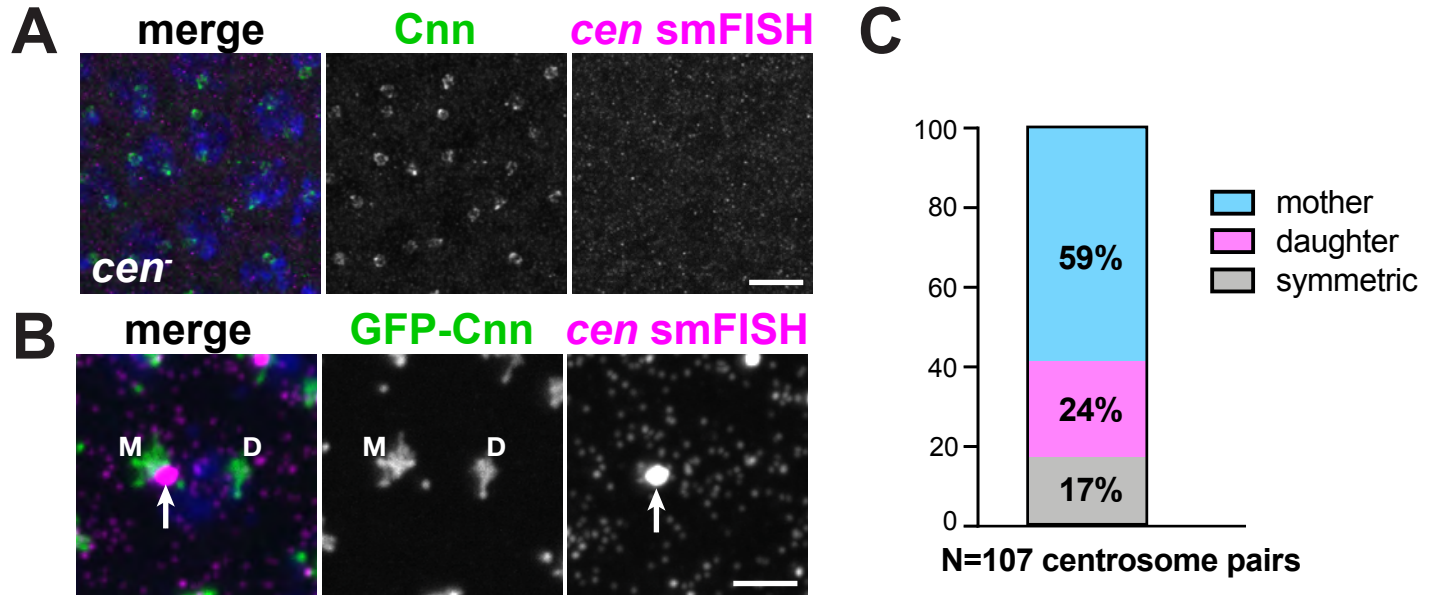

**Figure 2 Supplement 1. The *cen* granule preferentially localizes to the mother centrosome.**

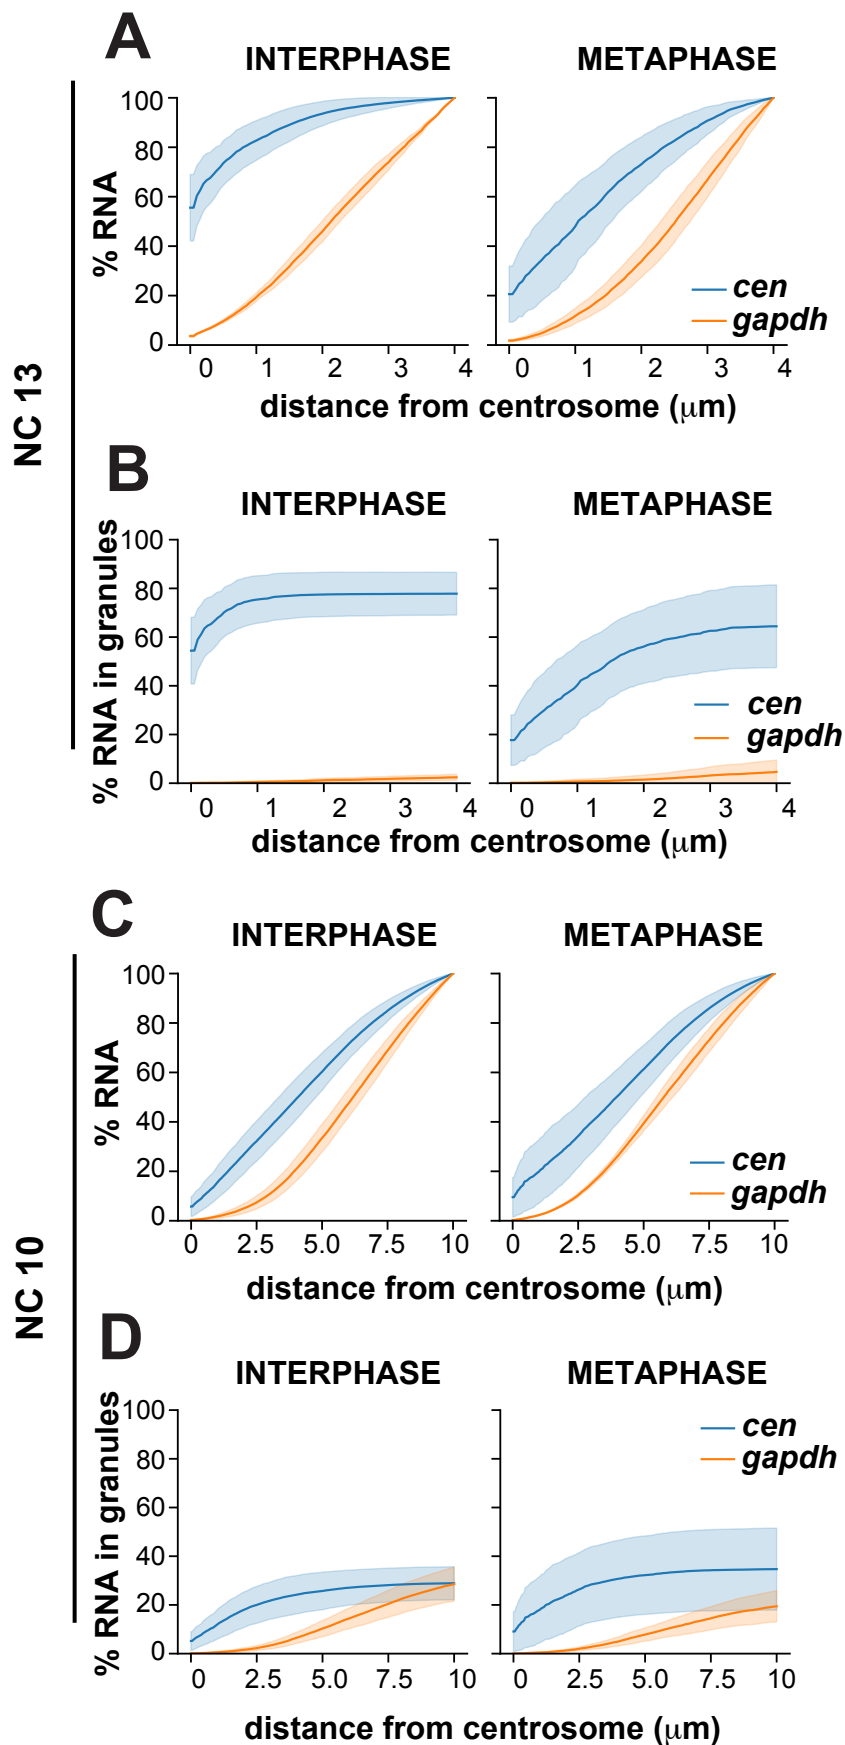

Figure 2 Supplement 2. Cumulative distributions of *cen* RNA across the total cell volume.



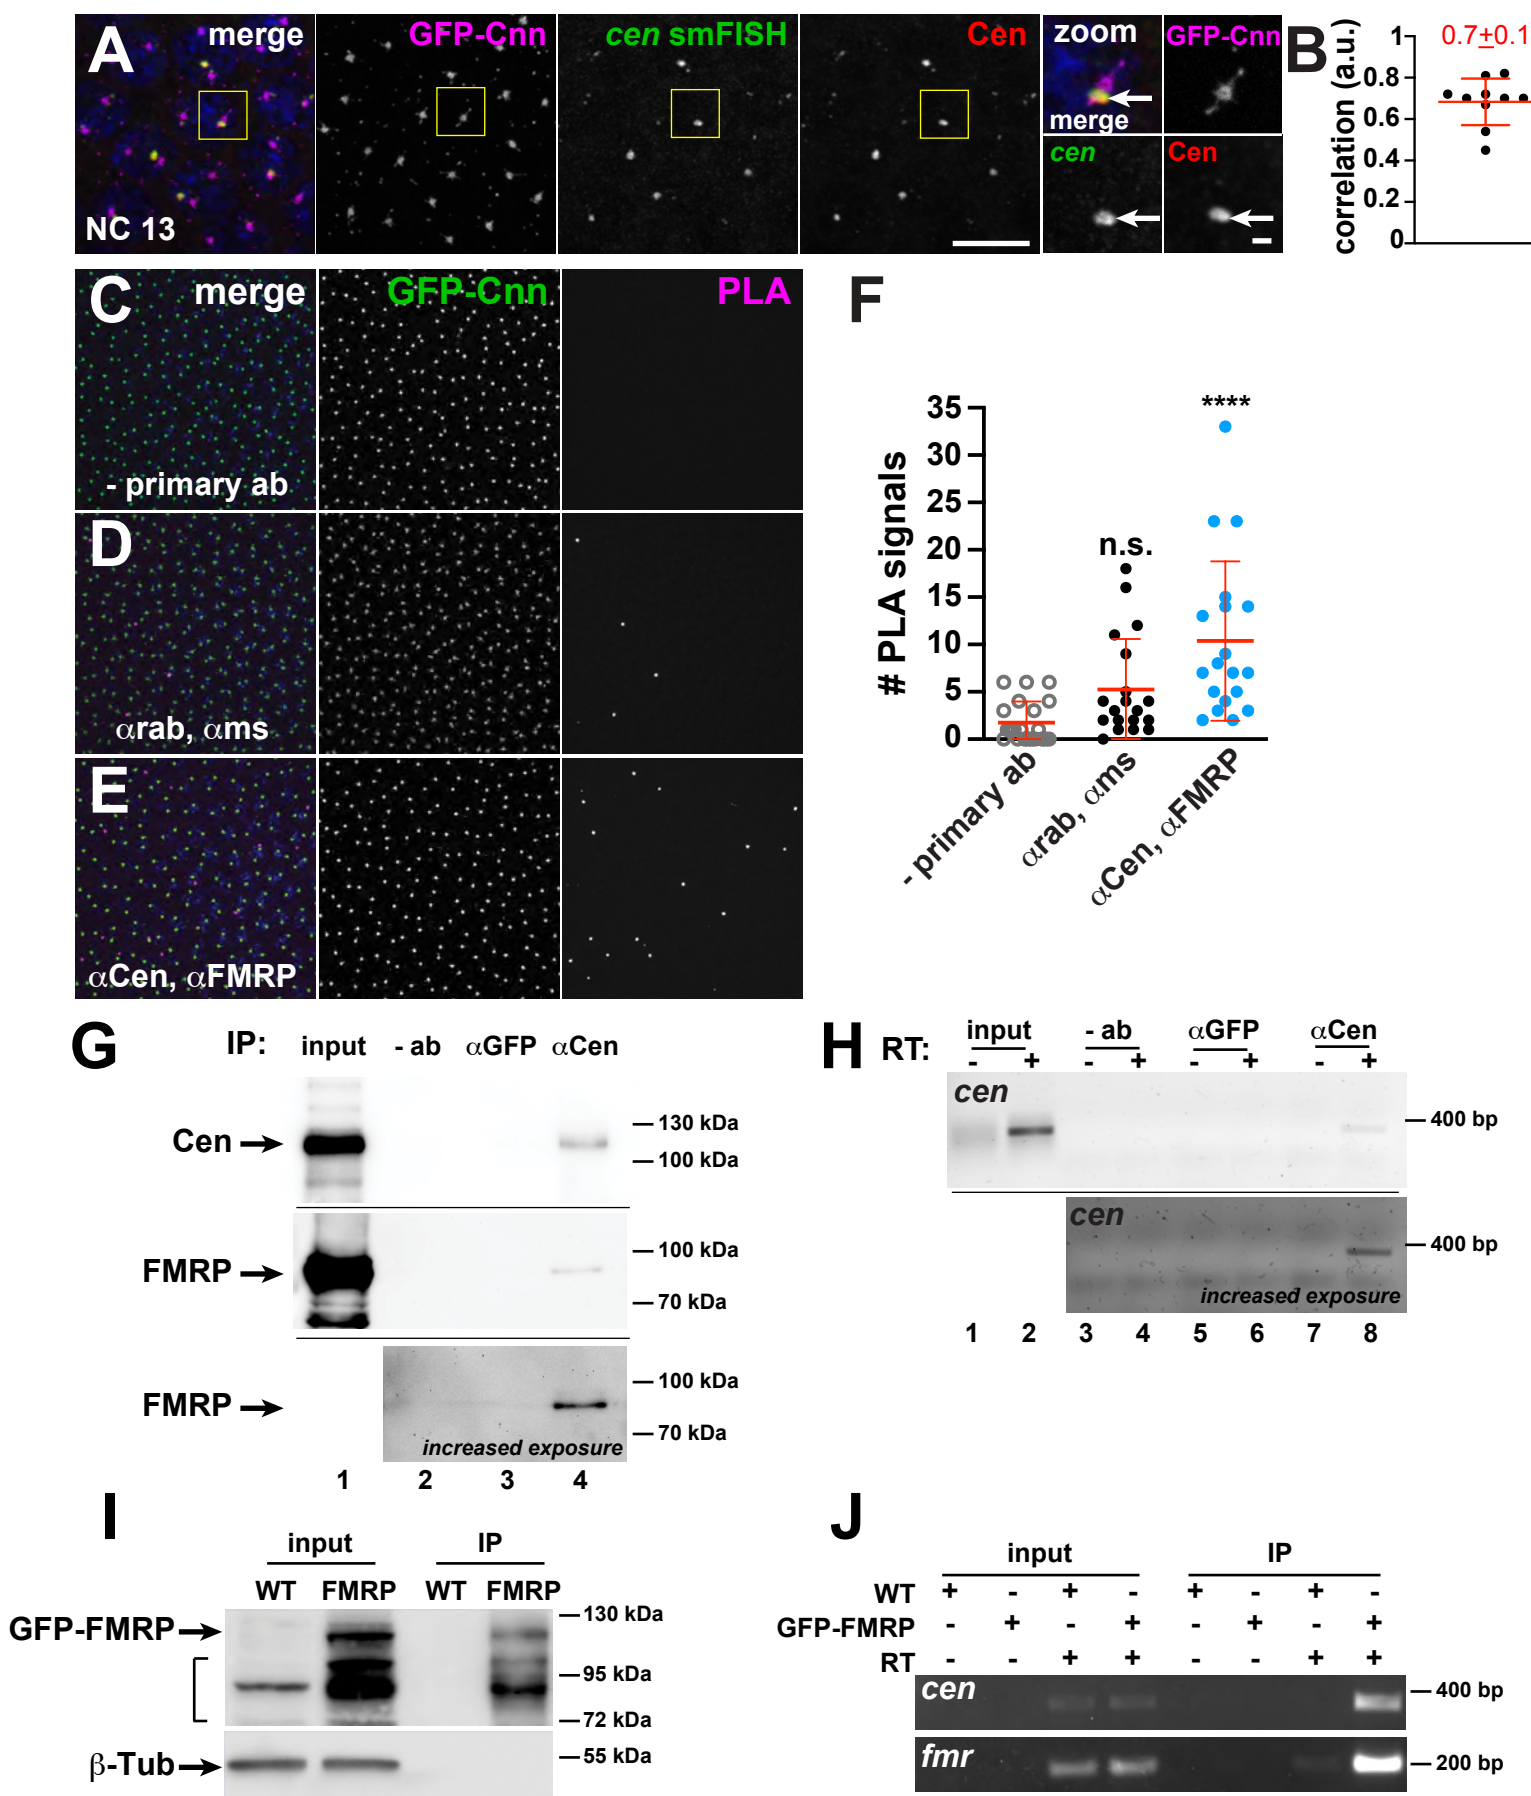

Figure 3. Composition of the *cen* granule.

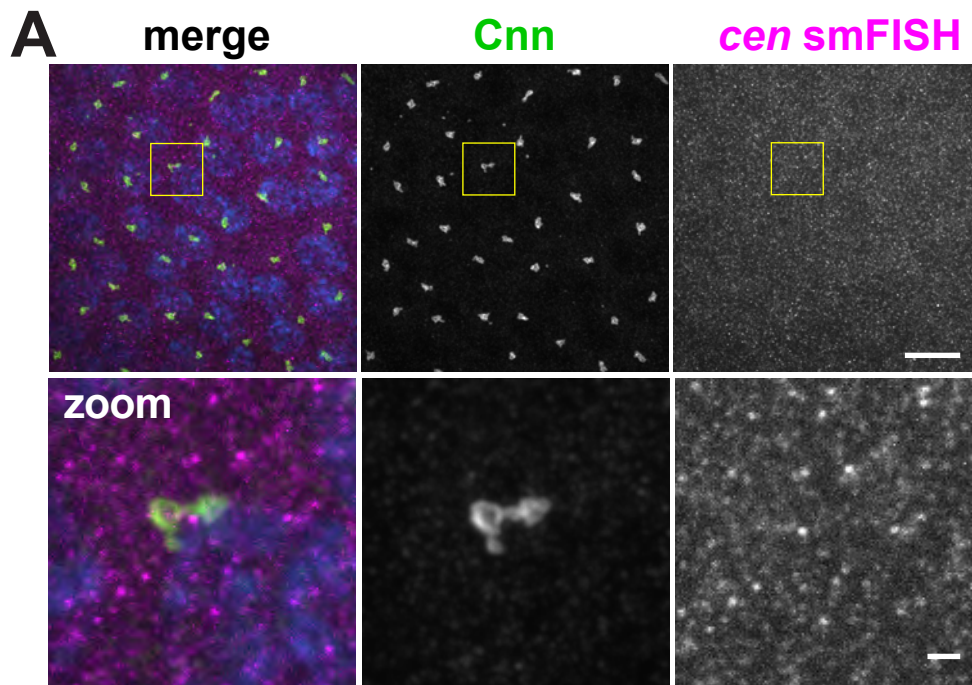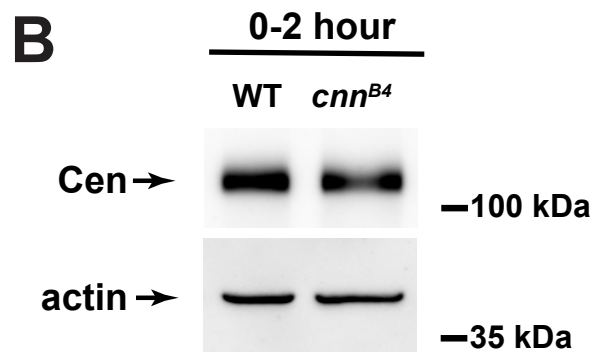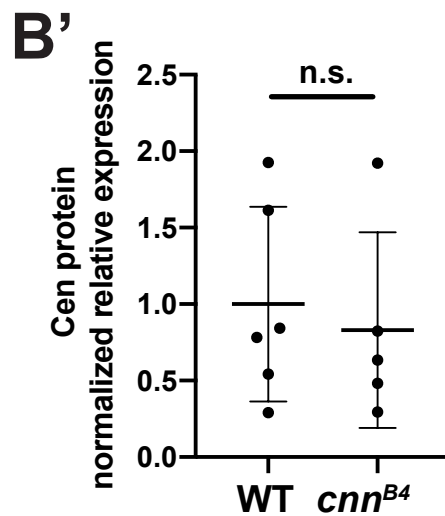

**Figure 3 Supplement 1. *cen* granule formation requires the centrosome scaffold.**

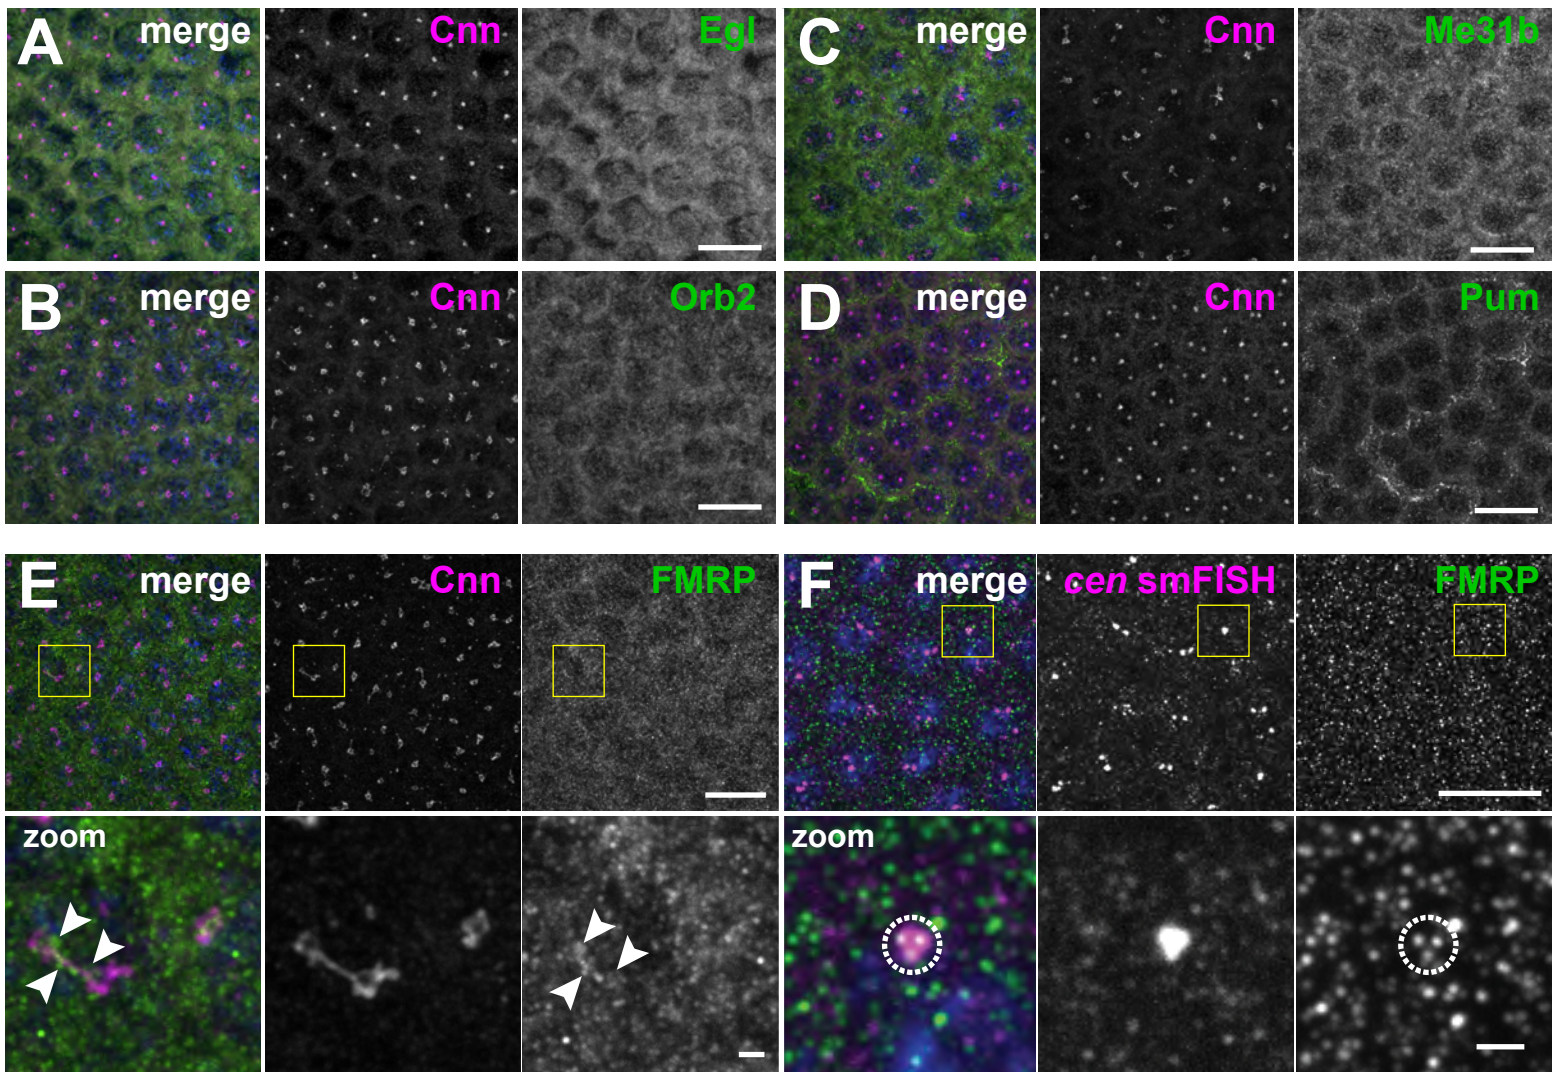

**Figure 3 Supplement 2. Candidate-based screen for centrosome localization of RNA-binding proteins.**

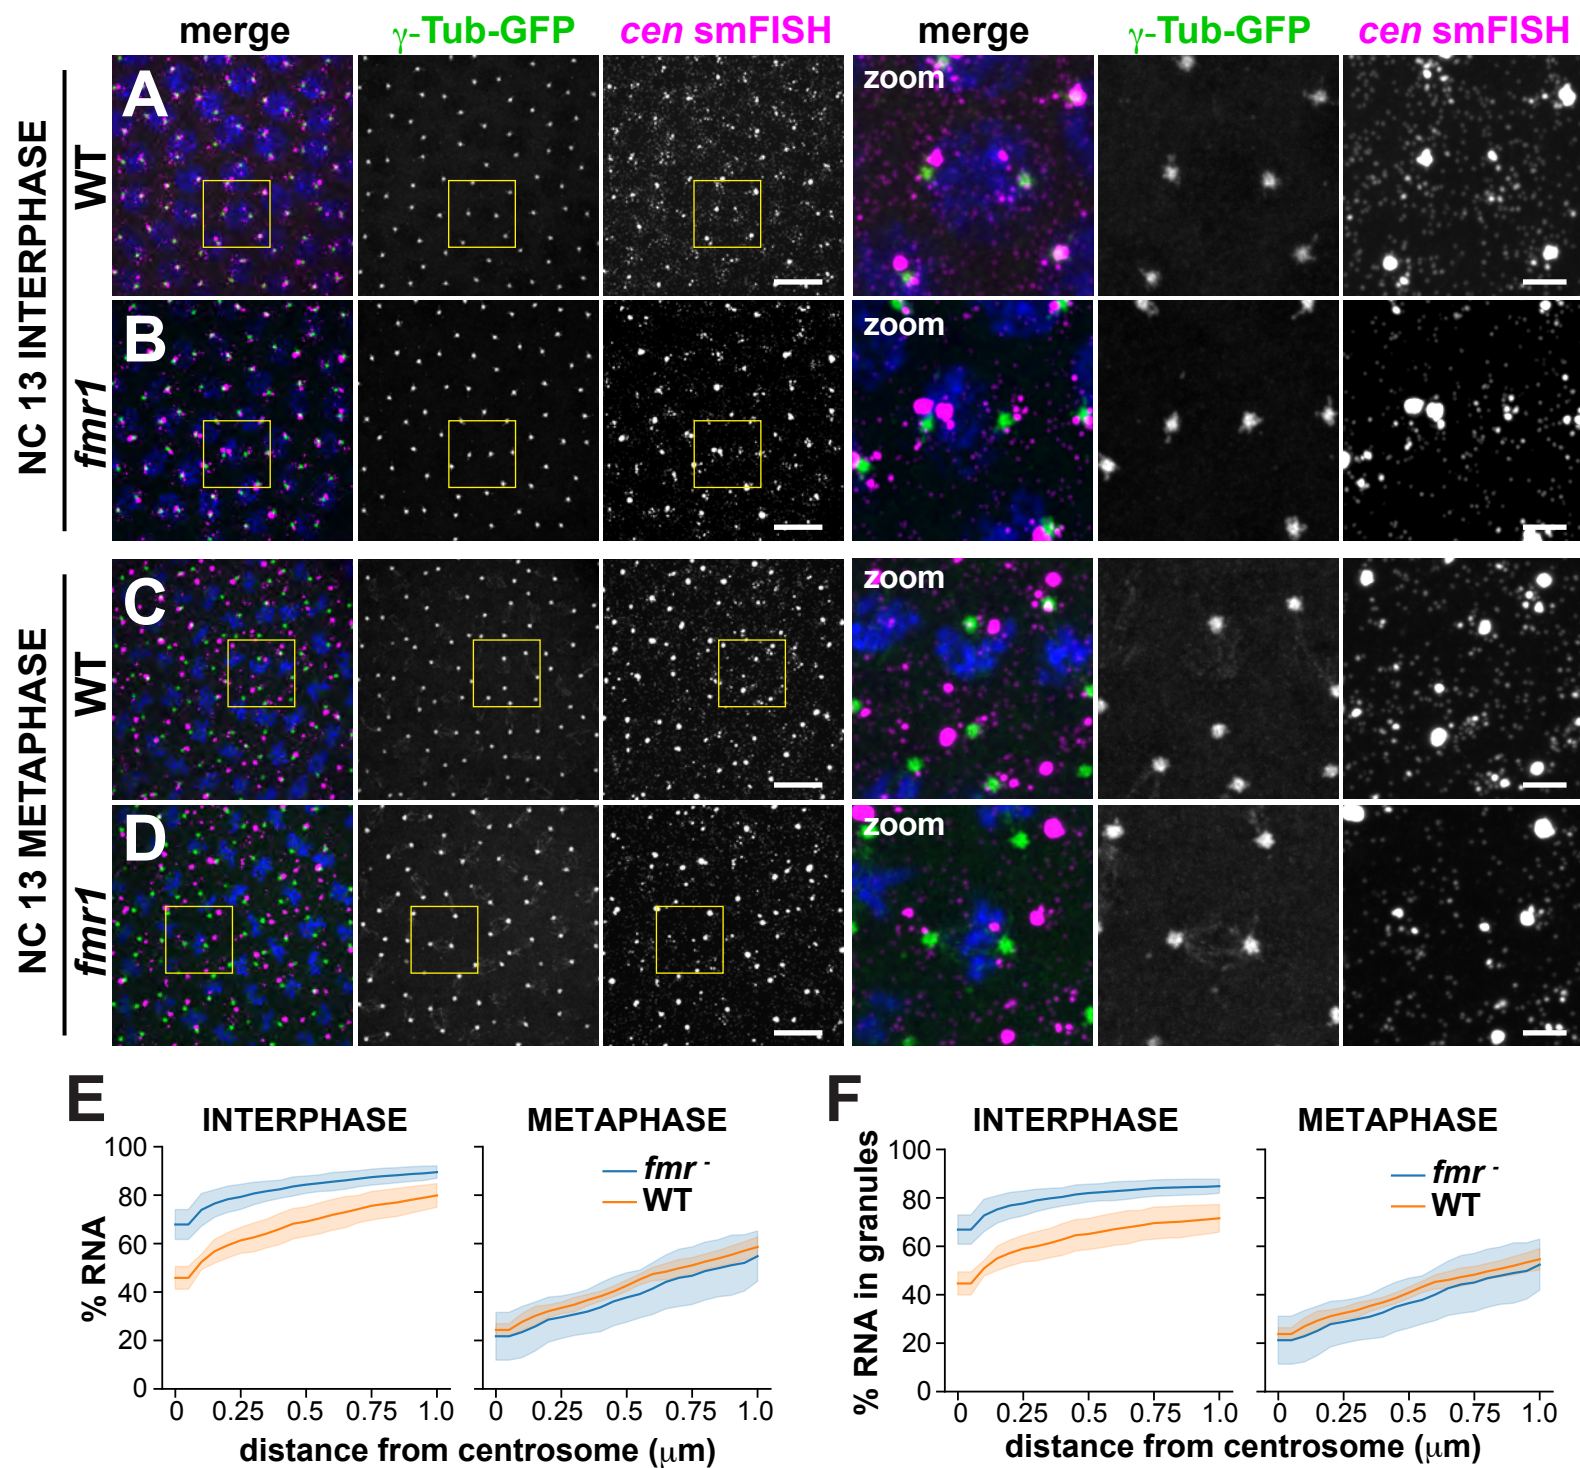

**Figure 4. *Fmr1* regulates *cen* granule formation and size.**

merge  $\gamma$ -Tub-GFP *cen* smFISH merge  $\gamma$ -Tub-GFP *cen* smFISH

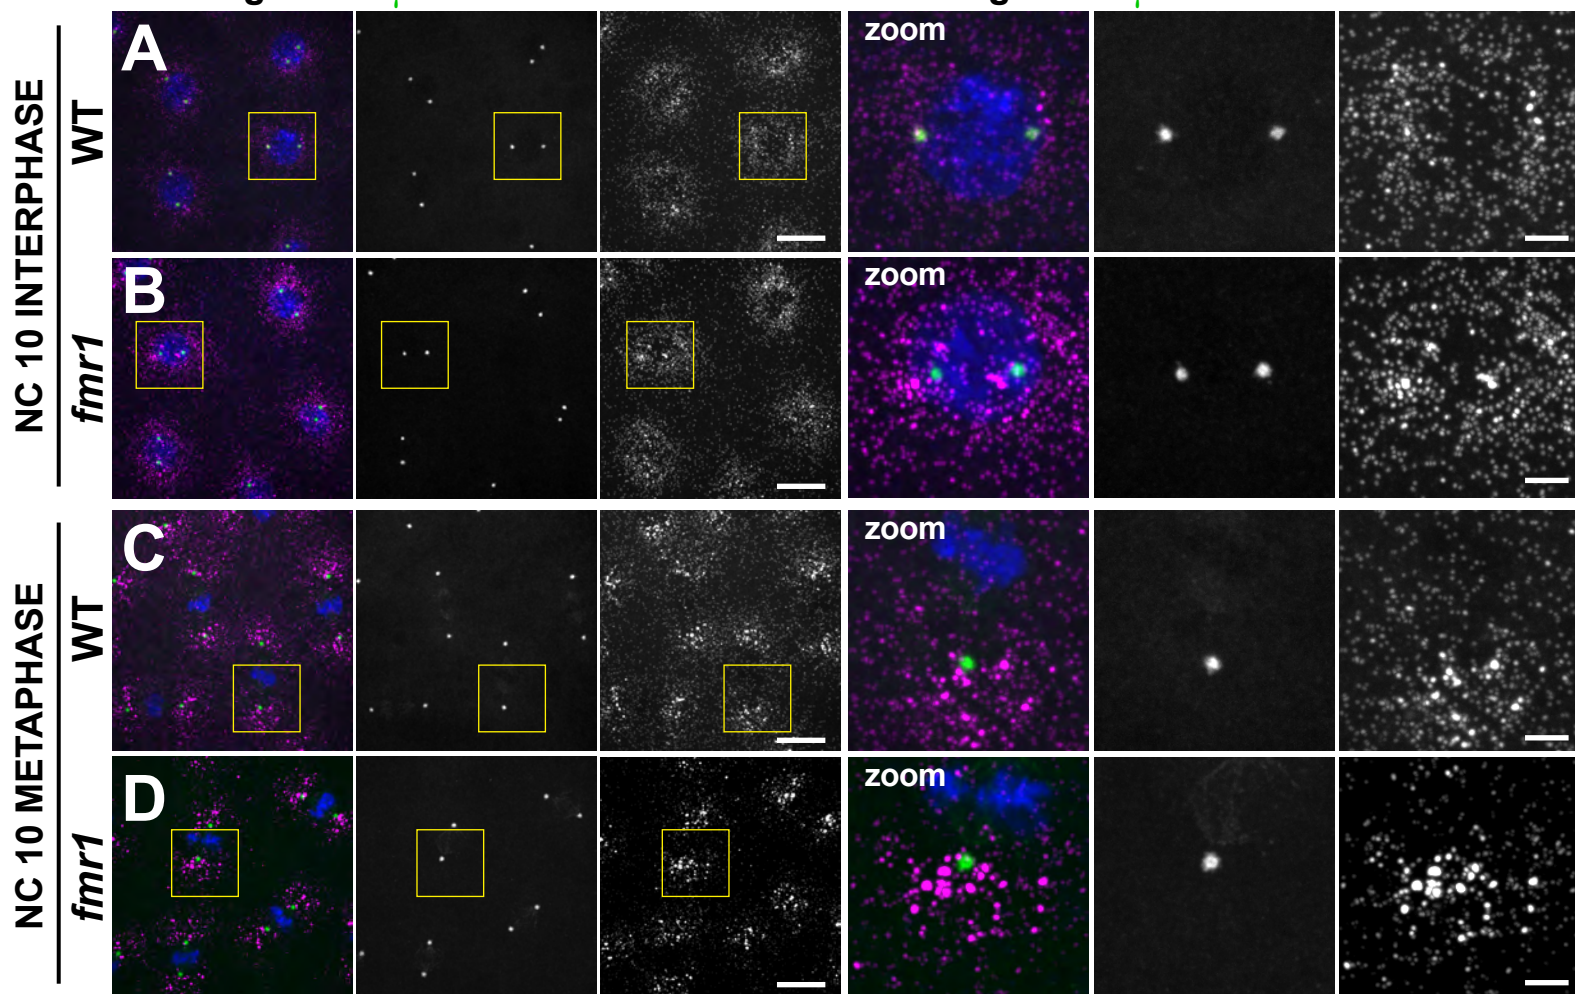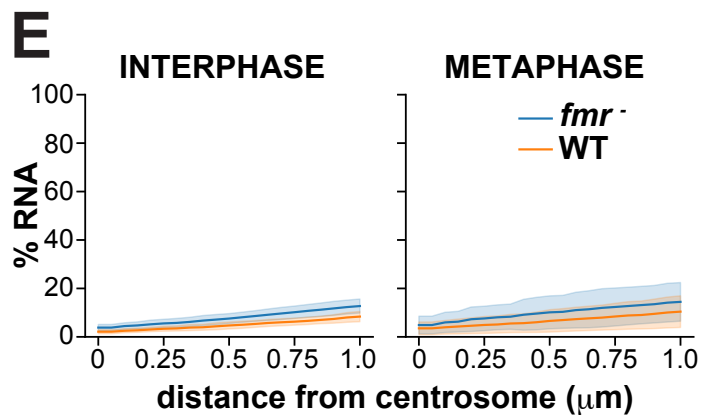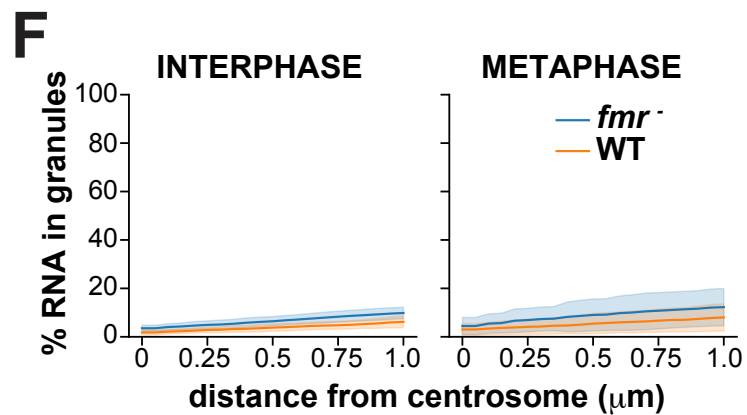

Figure 4. Supplement 1. FMRP instructs the timing of cen RNA granule formation.

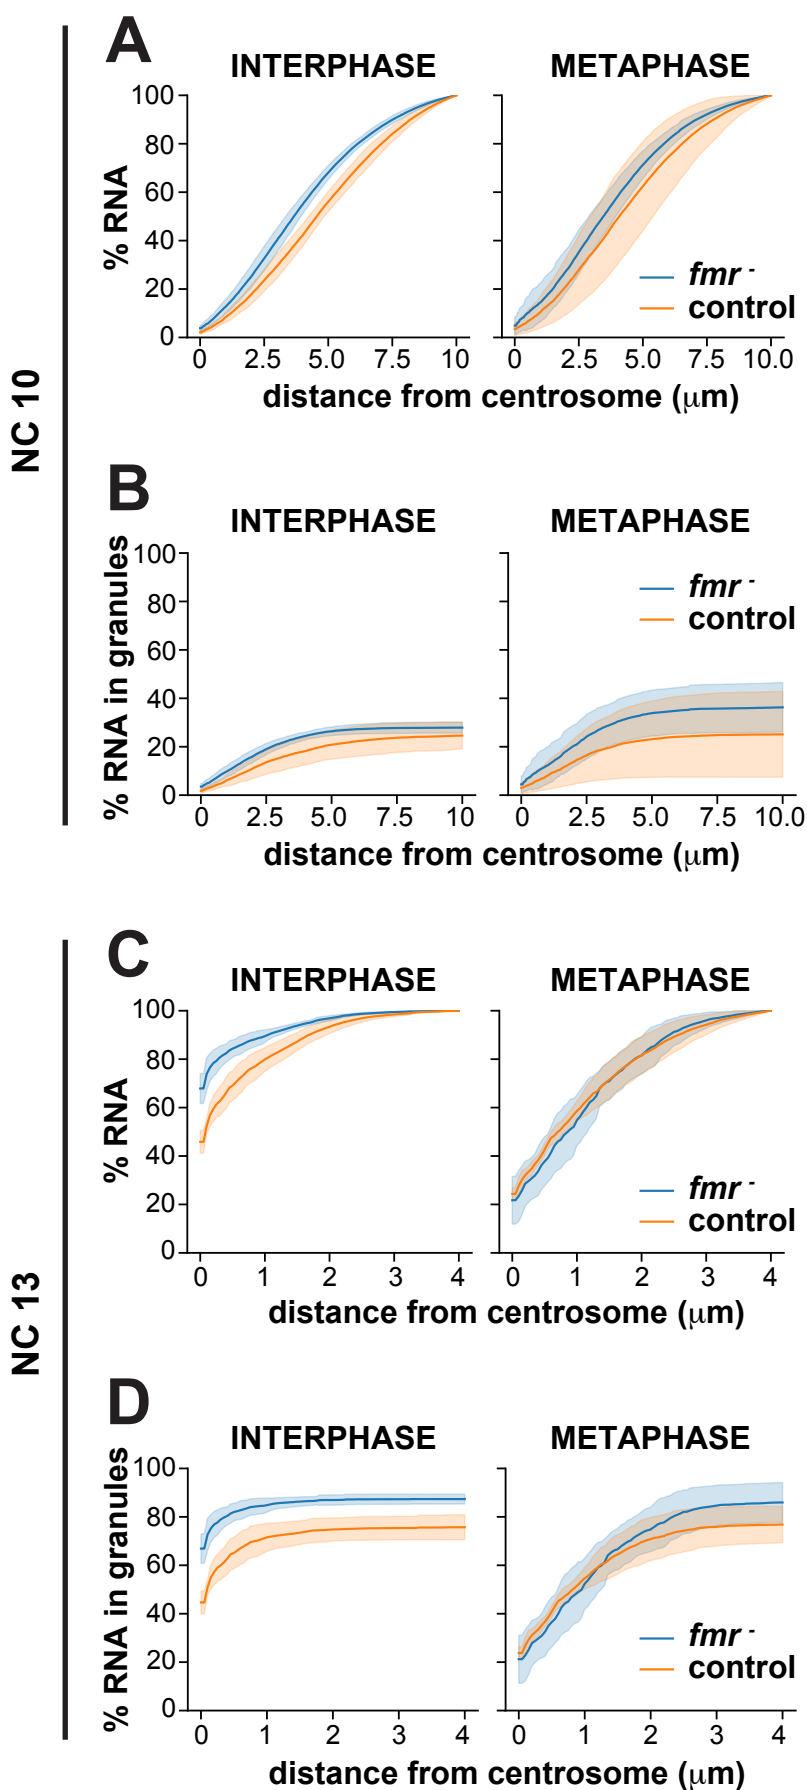

Figure 4 Supplement 2. Cumulative distributions of *cen* RNA across the total cell volume in *fmr1* mutants.

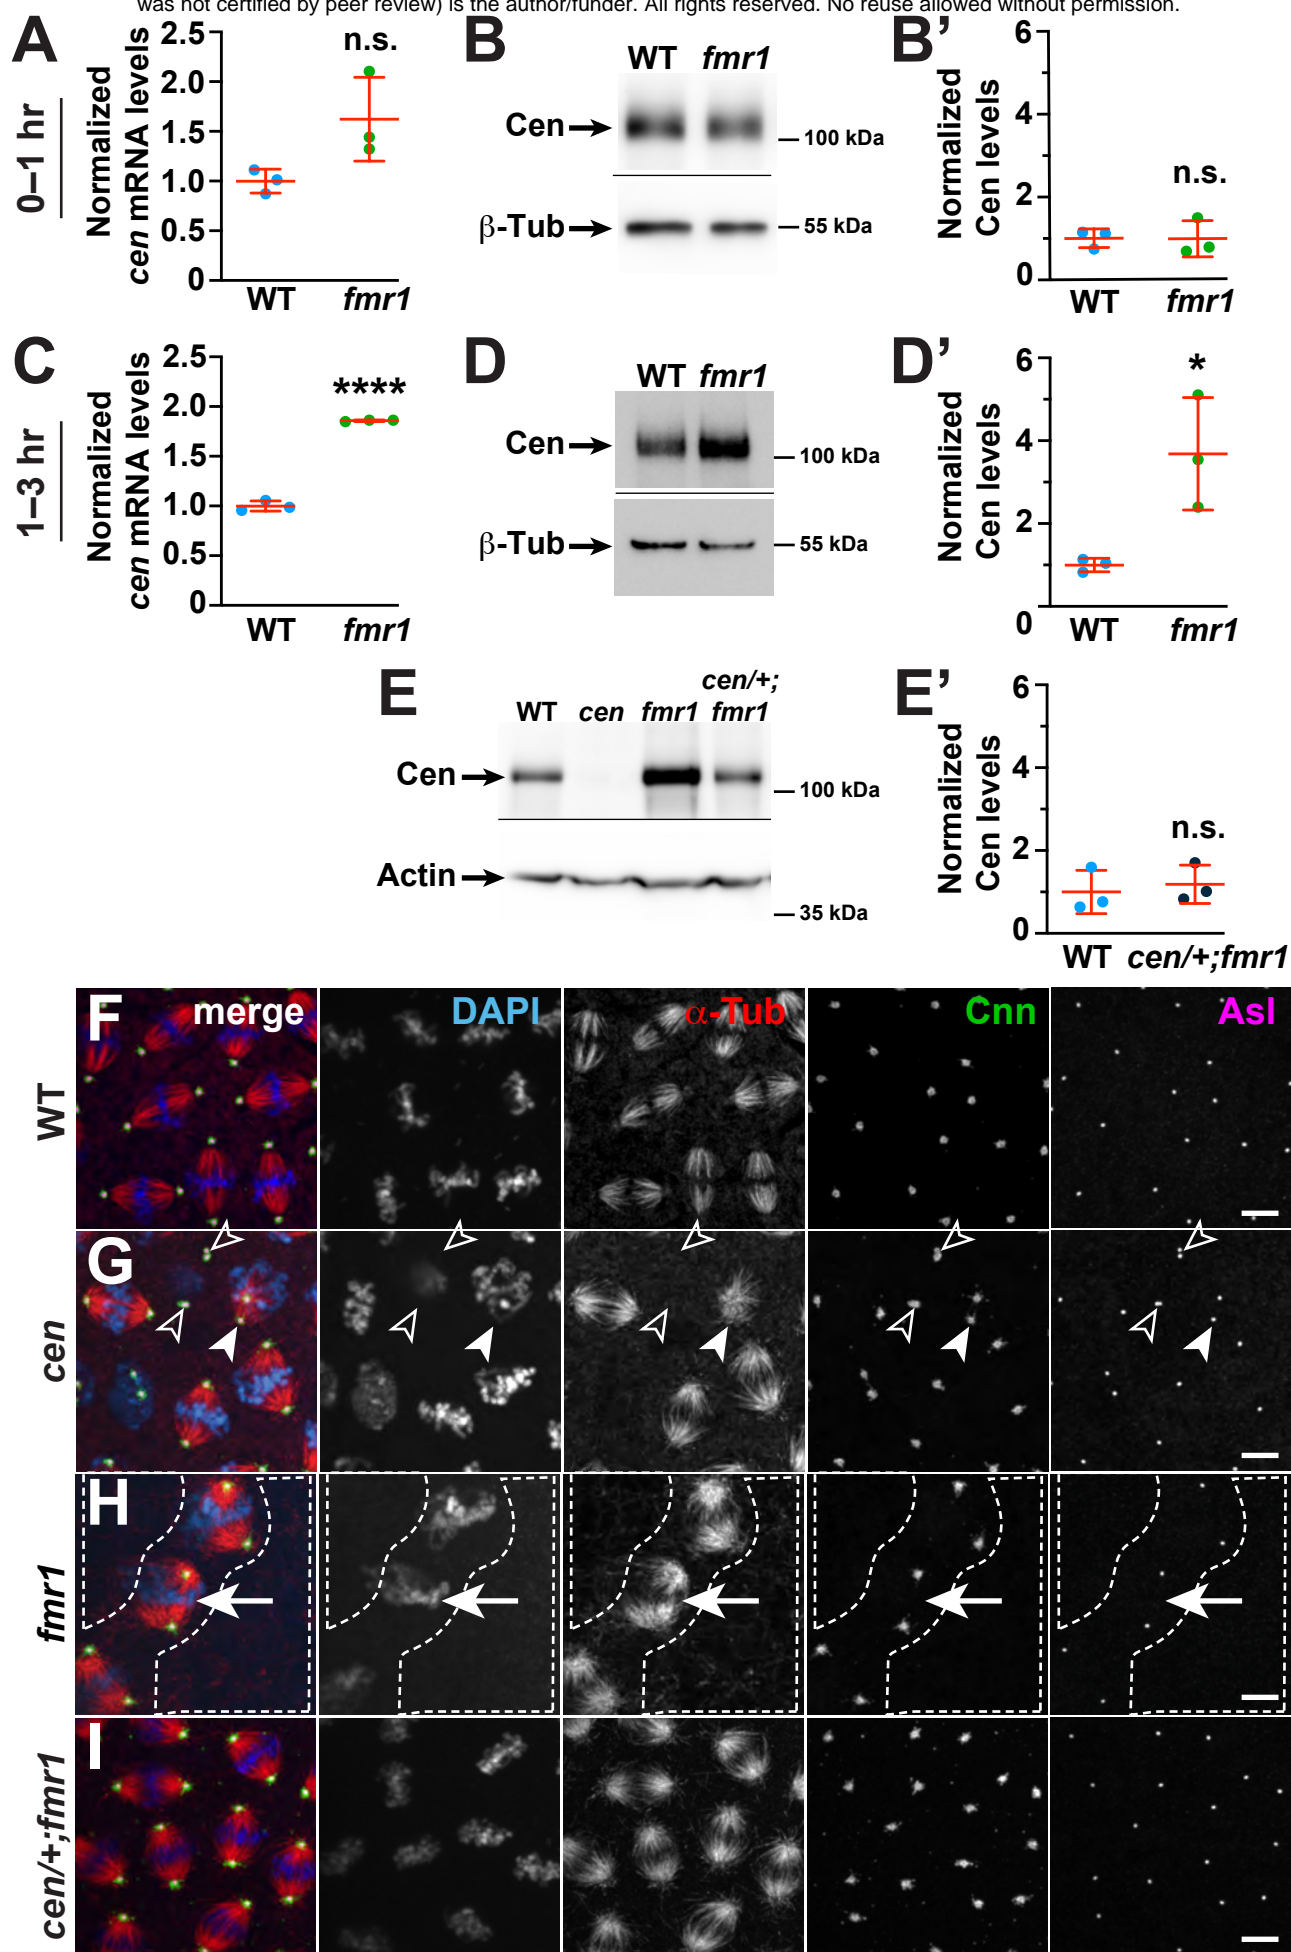

Figure 5. FMRP regulates *cen* to ensure error-free mitosis

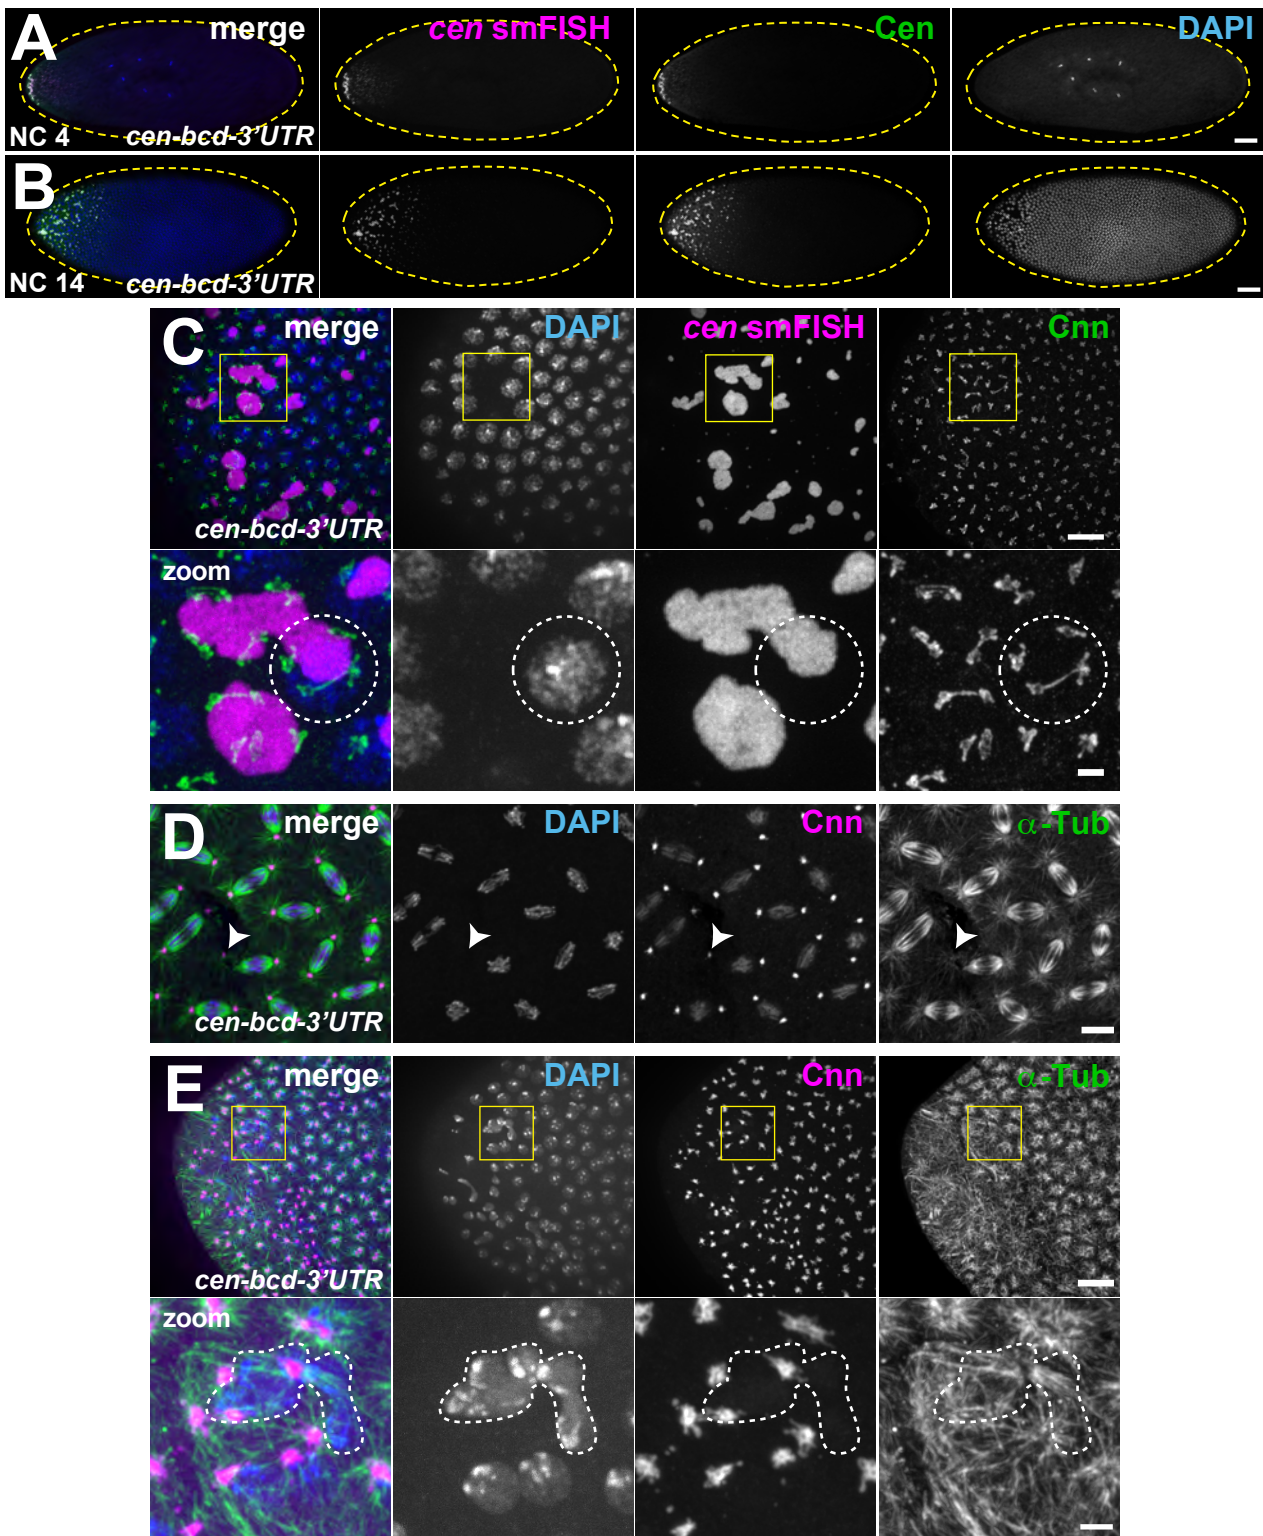

**Figure 6. Ectopic localization of *cen* RNA disrupts nuclear divisions.**



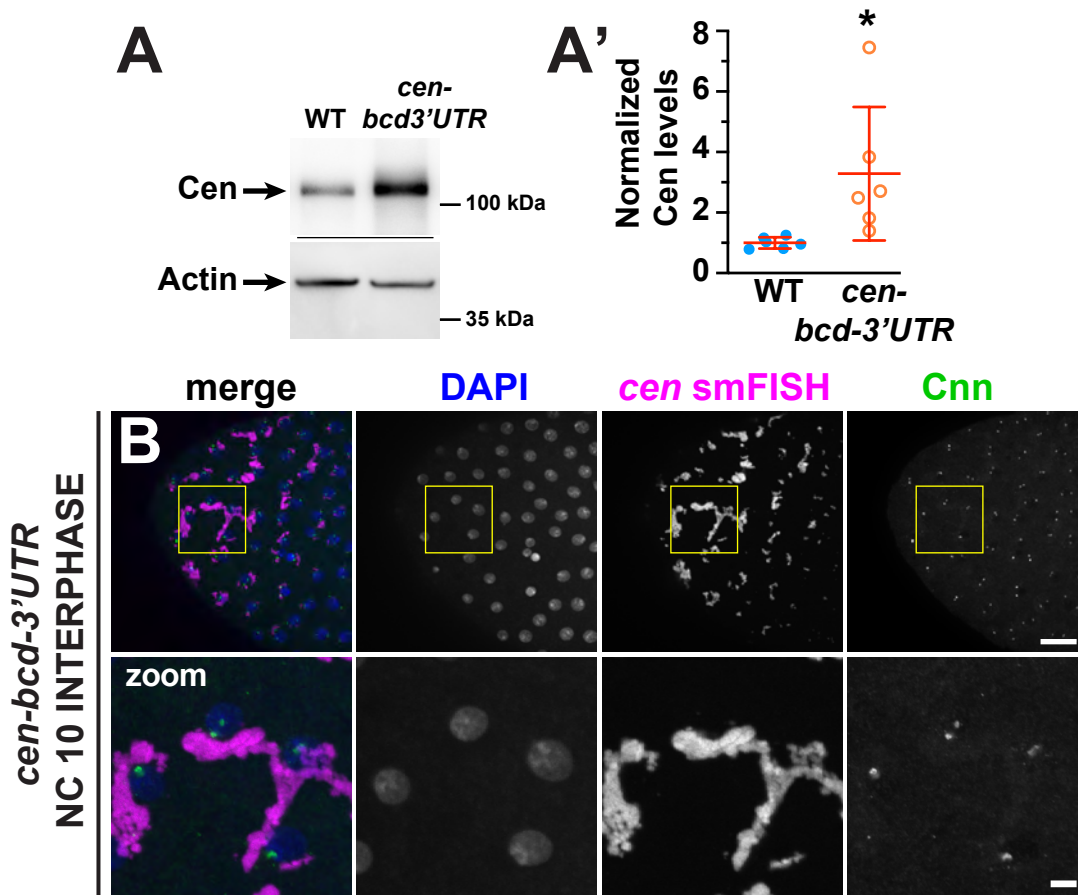

Figure 6 Supplement 1. The *cen* 3'UTR is required for temporal control of granule formation.

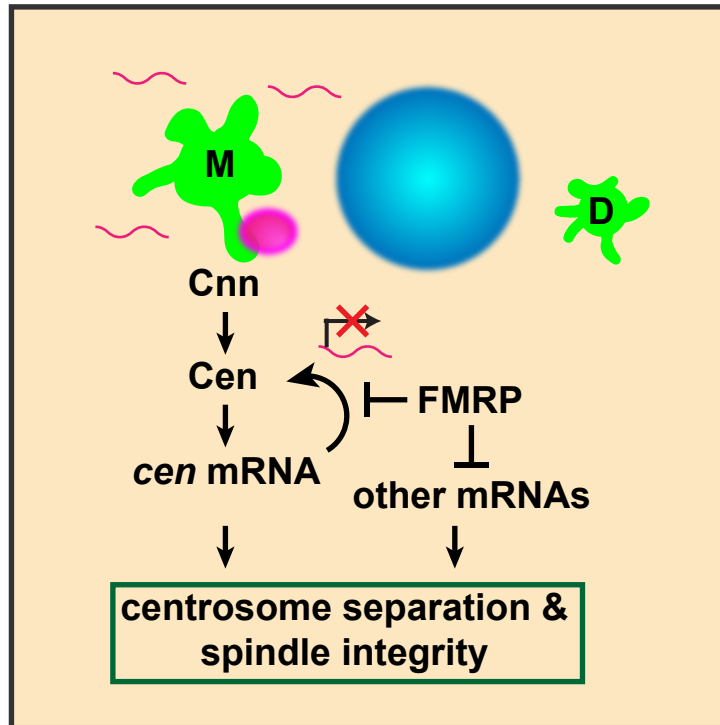

**Figure 7. Model of FMRP-mediated *cen* mRNA localization and translational control at centrosomes.**
